# Supplementary material
Source: PubMed Central journal article supplement (PMC2850442)
Supplement: mmc1.pdf [file mmc1.pdf]

# Integrating Pathway Analysis and Genetics of Gene Expression for Genome-wide Association Studies

Hua Zhong, Xia Yang, Lee M. Kaplan, Cliona Molony, and Eric Schadt

Figure S1. Diagram Illustrating the Integrative Analysis Steps

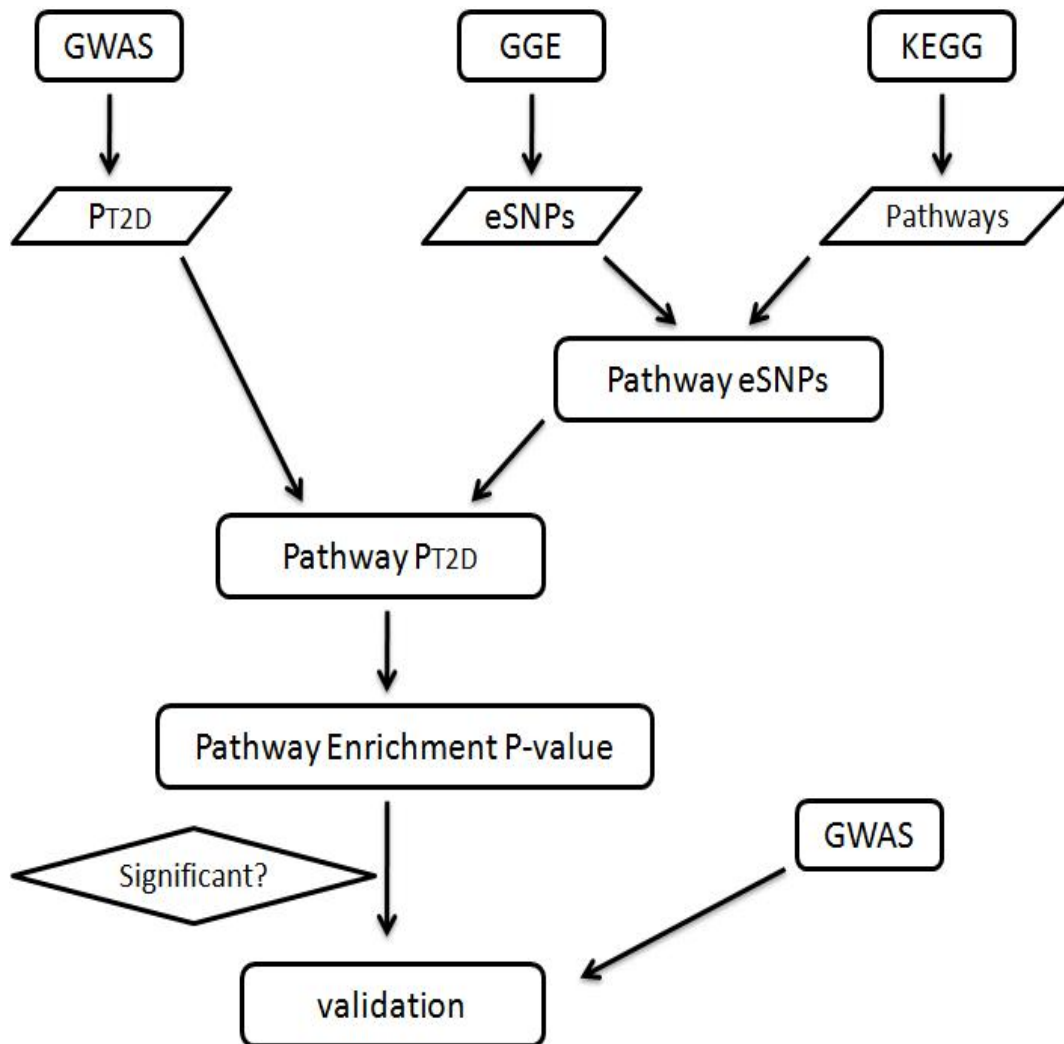

**Table S1. p Values for All the Tested Pathways**

Pathway gene counts, % of genes with eSNPs, p-values are presented for all the tested pathways, including 110 KEGG pathways and 12 artificially designed pathways (two positive controls and ten negative controls).

| <b>Pathway</b>                                        | <b>Count</b> | <b>% Genes with eSNP</b> | <b>p Value</b> |
|-------------------------------------------------------|--------------|--------------------------|----------------|
| Tight junction                                        | 186          | 39%                      | 0.0012         |
| Glycan structures - biosynthesis 1                    | 147          | 50%                      | 0.0019         |
| Pancreatic cancer                                     | 115          | 28%                      | 0.0058         |
| Bladder cancer                                        | 70           | 31%                      | 0.0068         |
| Adherens junction                                     | 110          | 45%                      | 0.0074         |
| Neuroactive ligand-receptor interaction               | 321          | 34%                      | 0.0076         |
| Calcium signaling pathway                             | 239          | 39%                      | 0.0096         |
| Hematopoietic cell lineage                            | 120          | 33%                      | 0.017          |
| Complement and coagulation cascades                   | 108          | 46%                      | 0.018          |
| N-Glycan biosynthesis                                 | 50           | 56%                      | 0.021          |
| Glycosylphosphatidylinositol(GPI)-anchor biosynthesis | 24           | 88%                      | 0.023          |
| Phosphatidylinositol signaling system                 | 214          | 18%                      | 0.025          |
| Cell Communication                                    | 106          | 58%                      | 0.025          |
| PPAR signaling pathway                                | 92           | 43%                      | 0.029          |
| Ether lipid metabolism                                | 45           | 51%                      | 0.031          |
| TGF-beta signaling pathway                            | 134          | 45%                      | 0.035          |
| Cell cycle                                            | 162          | 36%                      | 0.037          |
| Antigen processing and presentation                   | 119          | 41%                      | 0.039          |
| Systemic lupus erythematosus                          | 101          | 42%                      | 0.04           |
| Arachidonic acid metabolism                           | 74           | 49%                      | 0.045          |
| Chronic myeloid leukemia                              | 115          | 28%                      | 0.045          |
| Olfactory transduction                                | 470          | 12%                      | 0.049          |
| Glycan structures - biosynthesis 2                    | 101          | 41%                      | 0.05           |
| Ribosome                                              | 94           | 37%                      | 0.05           |
| Melanoma                                              | 100          | 28%                      | 0.051          |
| Prostate cancer                                       | 138          | 33%                      | 0.054          |
| Glioma                                                | 103          | 31%                      | 0.055          |
| Alzheimer's disease                                   | 43           | 67%                      | 0.058          |
| Allograft rejection                                   | 63           | 43%                      | 0.063          |
| Type I diabetes mellitus                              | 70           | 39%                      | 0.075          |
| Wnt signaling pathway                                 | 193          | 43%                      | 0.076          |
| Alanine and aspartate metabolism                      | 42           | 50%                      | 0.081          |
| Graft-versus-host disease                             | 65           | 45%                      | 0.082          |
| Oxidative phosphorylation                             | 207          | 28%                      | 0.087          |
| mTOR signaling pathway                                | 69           | 35%                      | 0.09           |
| MAPK signaling pathway                                | 383          | 33%                      | 0.091          |

| <b>Pathway</b>                                             | <b>Count</b> | <b>% Genes with eSNP</b> | <b>p Value</b> |
|------------------------------------------------------------|--------------|--------------------------|----------------|
| Gap junction                                               | 148          | 30%                      | 0.095          |
| Autoimmune thyroid disease                                 | 38           | 82%                      | 0.099          |
| Glycan structures - degradation                            | 75           | 29%                      | 0.099          |
| Cell adhesion molecules (CAMs)                             | 214          | 43%                      | 0.099          |
| Tyrosine metabolism                                        | 87           | 44%                      | 0.108          |
| Small cell lung cancer                                     | 124          | 36%                      | 0.11           |
| O-Glycan biosynthesis                                      | 36           | 61%                      | 0.115          |
| Toll-like receptor signaling pathway                       | 147          | 31%                      | 0.124          |
| Focal adhesion                                             | 287          | 36%                      | 0.124          |
| ECM-receptor interaction                                   | 127          | 42%                      | 0.132          |
| Insulin signaling pathway                                  | 194          | 40%                      | 0.136          |
| Epithelial cell signaling in Helicobacter pylori infection | 130          | 25%                      | 0.137          |
| Ubiquitin mediated proteolysis                             | 167          | 44%                      | 0.137          |
| Colorectal cancer                                          | 114          | 39%                      | 0.146          |
| Glycerophospholipid metabolism                             | 97           | 43%                      | 0.149          |
| GnRH signaling pathway                                     | 163          | 34%                      | 0.149          |
| Glycine, serine and threonine metabolism                   | 97           | 29%                      | 0.158          |
| Regulation of actin cytoskeleton                           | 276          | 35%                      | 0.159          |
| Acute myeloid leukemia                                     | 89           | 26%                      | 0.166          |
| Fructose and mannose metabolism                            | 45           | 60%                      | 0.188          |
| Purine metabolism                                          | 190          | 51%                      | 0.2            |
| Inositol phosphate metabolism                              | 65           | 37%                      | 0.211          |
| Renal cell carcinoma                                       | 95           | 34%                      | 0.228          |
| Cytokine-cytokine receptor interaction                     | 363          | 31%                      | 0.243          |
| Arginine and proline metabolism                            | 50           | 42%                      | 0.244          |
| Melanogenesis                                              | 139          | 41%                      | 0.258          |
| Sphingolipid metabolism                                    | 50           | 52%                      | 0.28           |
| Basal cell carcinoma                                       | 73           | 37%                      | 0.288          |
| Adipocytokine signaling pathway                            | 104          | 38%                      | 0.302          |
| Valine, leucine and isoleucine degradation                 | 64           | 53%                      | 0.31           |
| SNARE interactions in vesicular transport                  | 49           | 53%                      | 0.32           |
| Leukocyte transendothelial migration                       | 170          | 36%                      | 0.335          |
| Fc epsilon RI signaling pathway                            | 122          | 33%                      | 0.339          |
| Pyrimidine metabolism                                      | 114          | 59%                      | 0.344          |
| VEGF signaling pathway                                     | 108          | 35%                      | 0.351          |
| Glutathione metabolism                                     | 62           | 60%                      | 0.371          |
| Pyruvate metabolism                                        | 64           | 53%                      | 0.373          |
| ErbB signaling pathway                                     | 134          | 28%                      | 0.398          |
| Fatty acid metabolism                                      | 72           | 43%                      | 0.407          |
| Long-term depression                                       | 131          | 34%                      | 0.417          |
| Endometrial cancer                                         | 76           | 33%                      | 0.419          |
| EPEC                                                       | 74           | 34%                      | 0.424          |

| <b>Pathway</b>                               | <b>Count</b> | <b>% Genes with eSNP</b> | <b>p Value</b> |
|----------------------------------------------|--------------|--------------------------|----------------|
| Pathogenic Escherichia coli infection        | 74           | 34%                      | 0.424          |
| Hedgehog signaling pathway                   | 74           | 31%                      | 0.429          |
| Non-small cell lung cancer                   | 82           | 33%                      | 0.486          |
| Bile acid biosynthesis                       | 52           | 44%                      | 0.493          |
| Long-term potentiation                       | 101          | 41%                      | 0.5            |
| Axon guidance                                | 206          | 36%                      | 0.518          |
| Jak-STAT signaling pathway                   | 178          | 29%                      | 0.598          |
| Base excision repair                         | 42           | 71%                      | 0.613          |
| Propanoate metabolism                        | 51           | 51%                      | 0.619          |
| Glycerolipid metabolism                      | 73           | 37%                      | 0.636          |
| Apoptosis                                    | 109          | 32%                      | 0.644          |
| Histidine metabolism                         | 59           | 41%                      | 0.652          |
| Butanoate metabolism                         | 59           | 37%                      | 0.655          |
| T cell receptor signaling pathway            | 122          | 34%                      | 0.672          |
| Neurodegenerative Diseases                   | 62           | 45%                      | 0.726          |
| ABC transporters                             | 73           | 40%                      | 0.739          |
| Thyroid cancer                               | 50           | 46%                      | 0.754          |
| Tryptophan metabolism                        | 85           | 42%                      | 0.772          |
| Natural killer cell mediated cytotoxicity    | 178          | 42%                      | 0.792          |
| Retinol metabolism                           | 80           | 56%                      | 0.8            |
| p53 signaling pathway                        | 94           | 46%                      | 0.804          |
| Notch signaling pathway                      | 61           | 36%                      | 0.813          |
| Drug metabolism - cytochrome P450            | 92           | 65%                      | 0.819          |
| Metabolism of xenobiotics by cytochrome P450 | 94           | 65%                      | 0.827          |
| Glycolysis / Gluconeogenesis                 | 92           | 46%                      | 0.829          |
| Aminoacyl-tRNA biosynthesis                  | 52           | 48%                      | 0.887          |
| Androgen and estrogen metabolism             | 78           | 50%                      | 0.889          |
| Starch and sucrose metabolism                | 93           | 52%                      | 0.941          |
| Taste transduction                           | 64           | 33%                      | 0.947          |
| B cell receptor signaling pathway            | 85           | 34%                      | 0.952          |
| Porphyrin and chlorophyll metabolism         | 54           | 61%                      | 0.959          |
| Drug metabolism - other enzymes              | 65           | 66%                      | 0.963          |
| Positive Control Pathway 1                   | 18           | 33%                      | <0.0001        |
| Positive Control Pathway 2                   | 46           | 79%                      | 0.0006         |
| Negative Control Pathway 1                   | 20           | 100%                     | 0.447          |
| Negative Control Pathway 2                   | 58           | 100%                     | 0.426          |
| Negative Control Pathway 3                   | 60           | 100%                     | 0.405          |
| Negative Control Pathway 4                   | 80           | 100%                     | 0.389          |
| Negative Control Pathway 5                   | 100          | 100%                     | 0.389          |
| Negative Control Pathway 6                   | 120          | 100%                     | 0.365          |
| Negative Control Pathway 7                   | 140          | 100%                     | 0.349          |
| Negative Control Pathway 8                   | 160          | 100%                     | 0.346          |

| <b>Pathway</b>              | <b>Count</b> | <b>% Genes with eSNP</b> | <b>p Value</b> |
|-----------------------------|--------------|--------------------------|----------------|
| Negative Control Pathway 9  | 180          | 100%                     | 0.327          |
| Negative Control Pathway 10 | 200          | 100%                     | 0.329          |

**Table S2. Representative eSNPs Information for the Pathways with False Discovery Rate  $\leq$  20%**

Genes, their representative eSNPs, expression tissues, eSNP-expression correlation p values, eSNP WTCCC PT2D, non-WTCCC PT2D and DIAGRAM PT2D are presented for pathways with FDR  $\leq$  20%, including the six-gene positive control pathway. Some eSNPs are presented in multiple rows as they are identified as eSNPs from multiple tissues. Only unique representative eSNPs were used in the analysis.

| Pathway           | Gene   | eSNP       | Tissue               | SNP-Expression Pvalue | SNP-T2D Pvalue |         |           |
|-------------------|--------|------------|----------------------|-----------------------|----------------|---------|-----------|
|                   |        |            |                      |                       | DIAGRAM        | WTCCC   | Non-WTCCC |
| Adherens junction | ACP1   | rs6708541  | subcutaneous adipose | 6.7E-05               | 2.2E-01        | 2.2E-01 | 4.8E-01   |
| Adherens junction | ACTG1  | rs7342974  | liver                | 3.0E-30               | 3.8E-01        | 1.8E-01 | 8.9E-01   |
| Adherens junction | ACTN1  | rs743128   | liver                | 6.5E-05               | 6.6E-02        | 7.7E-03 | 6.9E-01   |
| Adherens junction | ACTN3  | rs7925108  | omental adipose      | 1.2E-25               | 6.3E-02        | 9.3E-04 | 9.3E-01   |
| Adherens junction | ACTN3  | rs7925108  | subcutaneous adipose | 7.3E-08               | 6.3E-02        | 9.3E-04 | 9.3E-01   |
| Adherens junction | ACVR1C | rs13383985 | liver                | 5.9E-06               | NA             | 4.9E-01 | NA        |
| Adherens junction | BAIAP2 | rs4969385  | liver                | 1.2E-05               | NA             | 7.0E-01 | NA        |
| Adherens junction | CDH1   | rs12917815 | omental adipose      | 8.3E-05               | 6.1E-01        | 3.9E-02 | 3.4E-01   |
| Adherens junction | CREBBP | rs129963   | omental adipose      | 1.0E-04               | NA             | 3.7E-02 | NA        |
| Adherens junction | CSNK2B | rs1077394  | liver                | 2.0E-07               | 2.1E-05        | 5.5E-04 | 1.8E-03   |
| Adherens junction | CSNK2B | rs1077394  | omental adipose      | 2.2E-08               | 2.1E-05        | 5.5E-04 | 1.8E-03   |
| Adherens junction | CSNK2B | rs1077394  | subcutaneous adipose | 9.5E-08               | 2.1E-05        | 5.5E-04 | 1.8E-03   |
| Adherens junction | CTNNA1 | rs10062943 | omental adipose      | 3.0E-19               | 1.4E-01        | 1.9E-01 | 3.2E-01   |
| Adherens junction | CTNNA1 | rs10062943 | subcutaneous adipose | 1.1E-09               | 1.4E-01        | 1.9E-01 | 3.2E-01   |
| Adherens junction | CTNNA1 | rs744675   | omental adipose      | 2.9E-18               | 1.4E-01        | 1.9E-01 | 3.2E-01   |
| Adherens junction | CTNNA1 | rs744675   | subcutaneous adipose | 2.2E-11               | 1.4E-01        | 1.9E-01 | 3.2E-01   |
| Adherens junction | CTNNA2 | rs4296451  | omental adipose      | 1.6E-06               | 9.5E-01        | 1.0E-01 | 2.2E-01   |
| Adherens junction | CTNNA3 | rs2441718  | liver                | 8.8E-07               | 6.7E-02        | 1.6E-01 | 1.6E-01   |
| Adherens junction | CTNNB1 | rs9862024  | omental adipose      | 7.2E-05               | 9.2E-01        | 9.2E-02 | 2.2E-01   |
| Adherens junction | CTNND1 | rs549022   | omental adipose      | 2.7E-05               | 4.1E-01        | 5.3E-02 | 6.8E-01   |
| Adherens junction | EGFR   | rs13244925 | subcutaneous adipose | 2.1E-05               | 2.9E-01        | 1.1E-01 | 8.6E-01   |

| Pathway           | Gene   | eSNP       | Tissue               | SNP-Expression Pvalue | SNP-T2D Pvalue |          |            |
|-------------------|--------|------------|----------------------|-----------------------|----------------|----------|------------|
|                   |        |            |                      |                       | DIAGRAM        | WTCCC    | Non-WTCCC  |
| Adherens junction | EP300  | rs133036   | liver                | 2.9E-05               | 1.2E-01        | 2.5E-01  | 2.2E-01    |
| Adherens junction | FARP2  | rs17387035 | liver                | 7.4E-08               | 1.3E-02        | 3.1E-02  | 8.8E-02    |
| Adherens junction | FARP2  | rs17387035 | omental adipose      | 1.6E-11               | 1.3E-02        | 3.1E-02  | 8.8E-02    |
| Adherens junction | FARP2  | rs17387035 | subcutaneous adipose | 1.9E-05               | 1.3E-02        | 3.1E-02  | 8.8E-02    |
| Adherens junction | FGFR1  | rs7821392  | omental adipose      | 5.7E-05               | 8.5E-01        | 6.2E-01  | 8.9E-01    |
| Adherens junction | FGFR1  | rs7821392  | subcutaneous adipose | 5.0E-05               | 8.5E-01        | 6.2E-01  | 8.9E-01    |
| Adherens junction | FYN    | rs354545   | liver                | 8.20E-05              | 1.60E-01       | 7.70E-01 | 8.67E-02   |
| Adherens junction | IGF1R  | rs733710   | omental adipose      | 5.10E-05              | 1.10E-01       | 2.60E-01 | 1.91E-01   |
| Adherens junction | INSR   | rs2914572  | liver                | 6.30E-06              | NA             | 2.70E-01 | NA         |
| Adherens junction | INSR   | rs2914572  | omental adipose      | 3.80E-08              | NA             | 2.70E-01 | NA         |
| Adherens junction | INSR   | rs2914572  | subcutaneous adipose | 1.40E-05              | NA             | 2.70E-01 | NA         |
| Adherens junction | IQGAP1 | rs7163622  | omental adipose      | 5.00E-05              | 9.00E-01       | 3.50E-01 | 5.62E-01   |
| Adherens junction | LMO7   | rs9543947  | subcutaneous adipose | 0.00012               | 0.015          | 0.0073   | 0.22629414 |
| Adherens junction | MAPK3  | rs11865086 | subcutaneous adipose | 9.30E-05              | 8.00E-01       | 4.10E-01 | 7.54E-01   |
| Adherens junction | MLLT4  | rs6906754  | liver                | 1.20E-06              | 4.60E-01       | 6.40E-01 | 5.17E-01   |
| Adherens junction | MLLT4  | rs6906754  | omental adipose      | 6.90E-08              | 4.60E-01       | 6.40E-01 | 5.17E-01   |
| Adherens junction | PARD3  | rs3781128  | liver                | 0                     | 0.28           | 0.26     | 0.55522983 |
| Adherens junction | PTPN1  | rs4811072  | omental adipose      | 4.50E-05              | NA             | 1.10E-02 | NA         |
| Adherens junction | PTPRB  | rs7313937  | liver                | 8.50E-05              | 7.50E-01       | 5.10E-03 | 6.93E-02   |
| Adherens junction | PTPRF  | rs1887402  | liver                | 1.00E-04              | 2.90E-02       | 2.90E-03 | 5.31E-01   |
| Adherens junction | PTPRM  | rs1318213  | omental adipose      | 0.00012               | 0.65           | 0.25     | 0.76547273 |
| Adherens junction | PTPRM  | rs1318213  | subcutaneous adipose | 4.90E-07              | 6.50E-01       | 2.50E-01 | 7.65E-01   |
| Adherens junction | PVRL1  | rs10892507 | subcutaneous adipose | 9.00E-05              | 4.90E-01       | 8.20E-01 | 4.39E-01   |
| Adherens junction | PVRL2  | rs440277   | liver                | 0                     | 0.97           | 0.58     | 0.69353038 |
| Adherens junction | PVRL3  | rs17667034 | omental adipose      | 8.10E-05              | 2.80E-01       | 8.60E-02 | 9.09E-01   |
| Adherens junction | RAC1   | rs2347338  | omental adipose      | 8.00E-11              | 9.10E-01       | 1.30E-01 | 2.87E-01   |
| Adherens junction | RAC1   | rs2347338  | subcutaneous adipose | 4.70E-08              | 9.10E-01       | 1.30E-01 | 2.87E-01   |
| Adherens junction | RHOA   | rs9586     | omental adipose      | 3.60E-06              | 4.50E-01       | 3.00E-01 | 8.32E-01   |
| Adherens junction | SMAD2  | rs8085335  | subcutaneous adipose | 4.40E-05              | 5.20E-01       | 9.30E-02 | 6.44E-01   |
| Adherens junction | SMAD3  | rs266332   | liver                | 2.90E-05              | 4.60E-02       | 1.80E-03 | 8.02E-01   |

| Pathway           | Gene   | eSNP       | Tissue               | SNP-Expression Pvalue | SNP-T2D Pvalue |          |            |
|-------------------|--------|------------|----------------------|-----------------------|----------------|----------|------------|
|                   |        |            |                      |                       | DIAGRAM        | WTCCC    | Non-WTCCC  |
| Adherens junction | SMAD4  | rs12456284 | omental adipose      | 1.80E-05              | 1.30E-01       | 1.60E-01 | 3.34E-01   |
| Adherens junction | SNAI1  | rs1555317  | omental adipose      | 1.70E-06              | 3.80E-02       | 2.30E-02 | 2.96E-01   |
| Adherens junction | SNAI1  | rs1555317  | subcutaneous adipose | 8.10E-06              | 3.80E-02       | 2.30E-02 | 2.96E-01   |
| Adherens junction | SNAI2  | rs11987140 | liver                | 2.70E-05              | 2.90E-01       | 5.30E-01 | 3.37E-01   |
| Adherens junction | SORBS1 | rs3193970  | liver                | 5.60E-06              | 6.40E-01       | 1.60E-01 | 6.28E-01   |
| Adherens junction | TCF4   | rs17090051 | liver                | 4.60E-05              | 7.90E-01       | 4.10E-01 | 7.68E-01   |
| Adherens junction | TCF7   | rs2548975  | omental adipose      | 0.00013               | 0.87           | 0.087    | 0.2488846  |
| Adherens junction | TCF7L1 | rs4832156  | omental adipose      | 1.60E-05              | 1.50E-01       | 4.80E-02 | 6.88E-01   |
| Adherens junction | TGFBR1 | rs10819634 | liver                | 4.40E-05              | 7.30E-01       | 4.30E-02 | 2.49E-01   |
| Adherens junction | TGFBR2 | rs7625163  | liver                | 0                     | 0.7            | 0.24     | 0.67954428 |
| Adherens junction | VCL    | rs4745727  | omental adipose      | 4.30E-19              | 5.90E-02       | 6.40E-02 | 2.61E-01   |
| Adherens junction | VCL    | rs4745727  | subcutaneous adipose | 1.70E-07              | 5.90E-02       | 6.40E-02 | 2.61E-01   |
| Adherens junction | WASF1  | rs11757982 | omental adipose      | 1.10E-05              | 2.60E-01       | 3.40E-02 | 8.83E-01   |
| Adherens junction | WASF1  | rs11757982 | subcutaneous adipose | 3.90E-07              | 2.60E-01       | 3.40E-02 | 8.83E-01   |
| Adherens junction | WASF3  | rs793639   | liver                | 4.50E-10              | 3.70E-01       | 1.70E-02 | 4.96E-01   |
| Adherens junction | WASF3  | rs793639   | omental adipose      | 2.00E-07              | 3.70E-01       | 1.70E-02 | 4.96E-01   |
| Bladder cancer    | BRAF   | rs10487888 | omental adipose      | 5.60E-07              | 5.70E-01       | 3.60E-01 | 9.60E-01   |
| Bladder cancer    | BRAF   | rs10487888 | subcutaneous adipose | 7.30E-08              | 5.70E-01       | 3.60E-01 | 9.60E-01   |
| Bladder cancer    | CCND1  | rs4584599  | subcutaneous adipose | 1.10E-06              | NA             | 2.40E-02 | NA         |
| Bladder cancer    | CDH1   | rs12917815 | omental adipose      | 8.30E-05              | 6.10E-01       | 3.90E-02 | 3.39E-01   |
| Bladder cancer    | CDK4   | rs867008   | subcutaneous adipose | 1.30E-05              | 4.30E-01       | 3.80E-01 | 6.99E-01   |
| Bladder cancer    | DAPK1  | rs3128479  | omental adipose      | 2.90E-05              | 8.70E-01       | 9.60E-01 | 8.52E-01   |
| Bladder cancer    | E2F3   | rs9368222  | subcutaneous adipose | 5.20E-06              | 1.50E-11       | 1.50E-05 | 4.42E-09   |
| Bladder cancer    | ECGF1  | rs762669   | liver                | 9.80E-07              | NA             | 2.50E-03 | NA         |
| Bladder cancer    | EGFR   | rs13244925 | subcutaneous adipose | 2.10E-05              | 2.90E-01       | 1.10E-01 | 8.58E-01   |
| Bladder cancer    | FGFR3  | rs798754   | omental adipose      | 2.20E-15              | 2.50E-01       | 2.60E-02 | 8.42E-01   |
| Bladder cancer    | FGFR3  | rs798754   | subcutaneous adipose | 1.30E-22              | 2.50E-01       | 2.60E-02 | 8.42E-01   |
| Bladder cancer    | HRAS   | rs4963128  | omental adipose      | 5.70E-09              | 9.30E-01       | 2.50E-01 | 4.20E-01   |
| Bladder cancer    | KRAS   | rs11048019 | omental adipose      | 0.00011               | 0.051          | 0.041    | 0.28980561 |
| Bladder cancer    | KRAS   | rs4963884  | omental adipose      | 5.90E-05              | 6.30E-02       | 4.10E-02 | 3.52E-01   |



| Pathway                   | Gene    | eSNP       | Tissue               | SNP-Expression Pvalue | SNP-T2D Pvalue |          |            |
|---------------------------|---------|------------|----------------------|-----------------------|----------------|----------|------------|
|                           |         |            |                      |                       | DIAGRAM        | WTCCC    | Non-WTCCC  |
| Bladder cancer            | MAP2K1  | rs11857642 | subcutaneous adipose | 1.30E-08              | 7.20E-01       | 6.60E-01 | 8.87E-01   |
| Bladder cancer            | MAPK3   | rs11865086 | subcutaneous adipose | 9.30E-05              | 8.00E-01       | 4.10E-01 | 7.54E-01   |
| Bladder cancer            | MDM2    | rs1908668  | subcutaneous adipose | 0.00012               | 0.17           | 0.16     | 0.44128888 |
| Bladder cancer            | MMP2    | rs8043908  | subcutaneous adipose | 5.70E-05              | 9.00E-01       | 7.60E-01 | 9.43E-01   |
| Bladder cancer            | RAF1    | rs7617041  | liver                | 3.10E-05              | 3.60E-01       | 4.00E-01 | 5.55E-01   |
| Bladder cancer            | RASSF1  | rs1540293  | omental adipose      | 4.50E-05              | 8.60E-01       | 5.60E-01 | 8.22E-01   |
| Bladder cancer            | THBS1   | rs11070174 | omental adipose      | 4.10E-05              | 8.30E-01       | 4.10E-01 | 7.14E-01   |
| Bladder cancer            | VEGF    | rs3025033  | omental adipose      | 1.80E-06              | NA             | 4.10E-02 | NA         |
| Bladder cancer            | VEGFB   | rs3751120  | omental adipose      | 1.50E-10              | 8.70E-02       | 2.30E-02 | 5.89E-01   |
| Bladder cancer            | VEGFB   | rs3751120  | subcutaneous adipose | 1.30E-05              | 8.70E-02       | 2.30E-02 | 5.89E-01   |
| Bladder cancer            | VEGFC   | rs1449738  | omental adipose      | 9.00E-05              | 1.40E-01       | 4.40E-01 | 1.54E-01   |
| Calcium signaling pathway | ADCY1   | rs1521470  | omental adipose      | 4.70E-05              | 4.80E-01       | 3.50E-02 | 4.71E-01   |
| Calcium signaling pathway | ADCY3   | rs1077492  | omental adipose      | 1.50E-05              | 4.70E-01       | 4.70E-01 | 6.75E-01   |
| Calcium signaling pathway | ADCY4   | rs6573766  | omental adipose      | 1.40E-06              | 2.30E-01       | 3.90E-02 | 1.00E+00   |
| Calcium signaling pathway | ADCY7   | rs1064448  | subcutaneous adipose | 5.90E-05              | 9.60E-01       | 5.70E-01 | 6.98E-01   |
| Calcium signaling pathway | ADCY9   | rs8049367  | subcutaneous adipose | 2.60E-05              | 7.50E-01       | 3.80E-02 | 2.18E-01   |
| Calcium signaling pathway | ADORA2A | rs3788372  | liver                | 2.90E-07              | 2.60E-01       | 1.10E-01 | 7.85E-01   |
| Calcium signaling pathway | ADORA2A | rs3788372  | omental adipose      | 2.20E-05              | 2.60E-01       | 1.10E-01 | 7.85E-01   |
| Calcium signaling pathway | ADORA2B | rs3112521  | liver                | 2.70E-06              | 3.40E-01       | 3.00E-01 | 6.26E-01   |
| Calcium signaling pathway | ADRA1A  | rs6992095  | subcutaneous adipose | 6.20E-05              | 1.50E-01       | 3.40E-02 | 7.74E-01   |
| Calcium signaling pathway | ADRA1B  | rs938541   | subcutaneous adipose | 6.30E-05              | 9.70E-01       | 3.30E-01 | 4.63E-01   |
| Calcium signaling pathway | ADRB1   | rs2782979  | liver                | 1.40E-08              | 1.20E-01       | 3.60E-04 | 4.71E-01   |
| Calcium signaling pathway | ADRB2   | rs973057   | omental adipose      | 5.90E-07              | 1.80E-01       | 7.50E-02 | 6.72E-01   |

| Pathway                   | Gene    | eSNP       | Tissue               | SNP-Expression Pvalue | SNP-T2D Pvalue |          |           |
|---------------------------|---------|------------|----------------------|-----------------------|----------------|----------|-----------|
|                           |         |            |                      |                       | DIAGRAM        | WTCCC    | Non-WTCCC |
| Calcium signaling pathway | AGTR1   | rs16861027 | liver                | 7.30E-05              | 8.30E-03       | 3.30E-02 | 5.22E-02  |
| Calcium signaling pathway | ATP2A3  | rs6502762  | subcutaneous adipose | 3.80E-05              | 4.50E-01       | 7.10E-02 | 6.83E-01  |
| Calcium signaling pathway | ATP2B1  | rs2220729  | omental adipose      | 1.00E-05              | 4.80E-01       | 1.40E-02 | 3.16E-01  |
| Calcium signaling pathway | ATP2B1  | rs2220729  | subcutaneous adipose | 9.50E-08              | 4.80E-01       | 1.40E-02 | 3.16E-01  |
| Calcium signaling pathway | ATP2B1  | rs2230283  | omental adipose      | 1.80E-05              | 6.20E-01       | 1.40E-02 | 1.96E-01  |
| Calcium signaling pathway | ATP2B1  | rs2230283  | subcutaneous adipose | 8.80E-08              | 6.20E-01       | 1.40E-02 | 1.96E-01  |
| Calcium signaling pathway | ATP2B4  | rs955865   | omental adipose      | 3.30E-08              | NA             | 3.00E-01 | NA        |
| Calcium signaling pathway | ATP2B4  | rs955865   | subcutaneous adipose | 2.30E-08              | NA             | 3.00E-01 | NA        |
| Calcium signaling pathway | BDKRB2  | rs4349080  | subcutaneous adipose | 2.20E-05              | 1.40E-01       | 2.10E-01 | 3.00E-01  |
| Calcium signaling pathway | BST1    | rs997250   | omental adipose      | 1.90E-09              | 3.80E-01       | 6.60E-03 | 3.31E-01  |
| Calcium signaling pathway | BST1    | rs997250   | subcutaneous adipose | 4.50E-08              | 3.80E-01       | 6.60E-03 | 3.31E-01  |
| Calcium signaling pathway | CACNA1D | rs555480   | liver                | 5.30E-07              | 1.40E-01       | 6.90E-02 | 5.62E-01  |
| Calcium signaling pathway | CACNA1G | rs989128   | subcutaneous adipose | 1.30E-05              | 7.70E-01       | 4.20E-01 | 8.07E-01  |
| Calcium signaling pathway | CALM1   | rs3213718  | liver                | 2.60E-06              | 1.50E-01       | 4.50E-02 | 7.04E-01  |
| Calcium signaling pathway | CALM2   | rs13430277 | omental adipose      | 1.10E-05              | 3.60E-01       | 1.80E-03 | 2.12E-01  |
| Calcium signaling pathway | CALM3   | rs11083846 | omental adipose      | 4.20E-05              | 7.60E-01       | 6.30E-01 | 9.72E-01  |
| Calcium signaling pathway | CALML5  | rs7098007  | liver                | 5.90E-05              | 7.30E-01       | 6.60E-02 | 3.15E-01  |
| Calcium signaling pathway | CALML6  | rs4648592  | omental adipose      | 4.80E-05              | 9.10E-01       | 3.10E-01 | 5.08E-01  |
| Calcium signaling pathway | CALML6  | rs4648592  | subcutaneous adipose | 9.10E-05              | 9.10E-01       | 3.10E-01 | 5.08E-01  |

| Pathway                   | Gene   | eSNP       | Tissue               | SNP-Expression Pvalue | SNP-T2D Pvalue |          |           |
|---------------------------|--------|------------|----------------------|-----------------------|----------------|----------|-----------|
|                           |        |            |                      |                       | DIAGRAM        | WTCCC    | Non-WTCCC |
| Calcium signaling pathway | CAMK2D | rs6835088  | liver                | 3.50E-12              | 3.80E-02       | 5.00E-02 | 1.95E-01  |
| Calcium signaling pathway | CAMK2D | rs6835088  | omental adipose      | 1.20E-48              | 3.80E-02       | 5.00E-02 | 1.95E-01  |
| Calcium signaling pathway | CAMK2D | rs6835088  | subcutaneous adipose | 2.80E-24              | 3.80E-02       | 5.00E-02 | 1.95E-01  |
| Calcium signaling pathway | CAMK2G | rs2894040  | subcutaneous adipose | 1.20E-06              | NA             | 1.50E-01 | NA        |
| Calcium signaling pathway | CAMK4  | rs7704970  | liver                | 3.30E-07              | 5.10E-01       | 4.50E-01 | 7.61E-01  |
| Calcium signaling pathway | CCKBR  | rs1876826  | omental adipose      | 5.80E-07              | 3.30E-01       | 4.10E-02 | 7.67E-01  |
| Calcium signaling pathway | CD38   | rs997250   | omental adipose      | 8.00E-10              | 3.80E-01       | 6.60E-03 | 3.31E-01  |
| Calcium signaling pathway | CHRM1  | rs530752   | omental adipose      | 6.40E-05              | 5.30E-02       | 3.70E-01 | 4.99E-02  |
| Calcium signaling pathway | CHRM3  | rs10495433 | liver                | 6.20E-05              | 4.50E-02       | 6.00E-02 | 2.06E-01  |
| Calcium signaling pathway | CHRM3  | rs10495434 | liver                | 1.00E-05              | 5.20E-02       | 6.00E-02 | 2.39E-01  |
| Calcium signaling pathway | CHRNA7 | rs1580141  | omental adipose      | 9.80E-08              | 1.50E-02       | 3.00E-05 | 9.94E-01  |
| Calcium signaling pathway | CHRNA7 | rs1580141  | subcutaneous adipose | 2.40E-05              | 1.50E-02       | 3.00E-05 | 9.94E-01  |
| Calcium signaling pathway | DRD1   | rs11949641 | subcutaneous adipose | 9.70E-05              | 9.20E-01       | 1.70E-01 | 3.33E-01  |
| Calcium signaling pathway | EDNRA  | rs2163011  | liver                | 6.40E-05              | 8.70E-02       | 6.90E-01 | 4.02E-02  |
| Calcium signaling pathway | EDNRB  | rs6563019  | subcutaneous adipose | 2.60E-06              | 4.40E-01       | 1.80E-02 | 4.03E-01  |
| Calcium signaling pathway | EGFR   | rs13244925 | subcutaneous adipose | 2.10E-05              | 2.90E-01       | 1.10E-01 | 8.58E-01  |
| Calcium signaling pathway | ERBB4  | rs1394782  | omental adipose      | 8.80E-06              | 6.00E-01       | 1.80E-01 | 7.23E-01  |
| Calcium signaling pathway | ERBB4  | rs1394782  | subcutaneous adipose | 3.20E-05              | 6.00E-01       | 1.80E-01 | 7.23E-01  |
| Calcium signaling pathway | F2R    | rs250760   | omental adipose      | 4.80E-05              | 3.50E-02       | 2.20E-01 | 5.30E-02  |

| Pathway                   | Gene   | eSNP       | Tissue               | SNP-Expression Pvalue | SNP-T2D Pvalue |          |            |
|---------------------------|--------|------------|----------------------|-----------------------|----------------|----------|------------|
|                           |        |            |                      |                       | DIAGRAM        | WTCCC    | Non-WTCCC  |
| Calcium signaling pathway | GNA11  | rs3746069  | liver                | 0                     | NA             | 0.72     | NA         |
| Calcium signaling pathway | GNA14  | rs11145448 | omental adipose      | 2.10E-05              | 5.50E-01       | 5.30E-01 | 7.47E-01   |
| Calcium signaling pathway | GNAL   | rs16976538 | omental adipose      | 6.50E-06              | 2.40E-01       | 1.50E-02 | 7.40E-01   |
| Calcium signaling pathway | GNAL   | rs16976538 | subcutaneous adipose | 9.00E-09              | 2.40E-01       | 1.50E-02 | 7.40E-01   |
| Calcium signaling pathway | GNAS   | rs259971   | liver                | 0                     | 0.39           | 0.4      | 0.6076069  |
| Calcium signaling pathway | GRIN2C | rs6501741  | omental adipose      | 4.30E-05              | 7.10E-03       | 3.00E-02 | 4.73E-02   |
| Calcium signaling pathway | GRM1   | rs3804295  | subcutaneous adipose | 6.30E-05              | 2.30E-01       | 1.60E-01 | 5.95E-01   |
| Calcium signaling pathway | GRM5   | rs2226624  | omental adipose      | 0.00012               | 0.71           | 0.71     | 0.82910397 |
| Calcium signaling pathway | HRH1   | rs2171543  | liver                | 3.80E-07              | 8.10E-01       | 5.10E-01 | 8.43E-01   |
| Calcium signaling pathway | HTR2B  | rs1472959  | omental adipose      | 8.40E-06              | 8.30E-01       | 2.70E-02 | 1.37E-01   |
| Calcium signaling pathway | HTR2B  | rs1472959  | subcutaneous adipose | 8.40E-05              | 8.30E-01       | 2.70E-02 | 1.37E-01   |
| Calcium signaling pathway | HTR7   | rs7895851  | omental adipose      | 9.80E-05              | 3.10E-01       | 8.40E-03 | 4.73E-01   |
| Calcium signaling pathway | ITPKB  | rs837748   | omental adipose      | 1.00E-04              | 1.50E-01       | 5.00E-01 | 1.46E-01   |
| Calcium signaling pathway | ITPR1  | rs4684443  | liver                | 1.70E-06              | 8.00E-03       | 1.70E-02 | 7.95E-02   |
| Calcium signaling pathway | ITPR2  | rs10506007 | omental adipose      | 4.20E-05              | 6.80E-01       | 5.20E-01 | 9.58E-01   |
| Calcium signaling pathway | ITPR3  | rs7769838  | liver                | 1.60E-06              | 7.90E-01       | 2.20E-01 | 5.35E-01   |
| Calcium signaling pathway | LHCGR  | rs6705602  | omental adipose      | 6.90E-05              | 7.40E-01       | 1.50E-01 | 4.84E-01   |
| Calcium signaling pathway | MYLK   | rs17373884 | subcutaneous adipose | 7.40E-05              | 5.70E-01       | 3.20E-01 | 9.89E-01   |
| Calcium signaling pathway | MYLK   | rs9289225  | subcutaneous adipose | 8.30E-05              | 5.70E-01       | 3.20E-01 | 9.89E-01   |

| Pathway                   | Gene  | eSNP       | Tissue               | SNP-Expression Pvalue | SNP-T2D Pvalue |          |            |
|---------------------------|-------|------------|----------------------|-----------------------|----------------|----------|------------|
|                           |       |            |                      |                       | DIAGRAM        | WTCCC    | Non-WTCCC  |
| Calcium signaling pathway | NOS2A | rs4796190  | omental adipose      | 4.70E-30              | 4.50E-01       | 4.20E-02 | 5.54E-01   |
| Calcium signaling pathway | NOS2A | rs4796190  | subcutaneous adipose | 3.30E-30              | 4.50E-01       | 4.20E-02 | 5.54E-01   |
| Calcium signaling pathway | NOS3  | rs13224758 | liver                | 5.00E-05              | NA             | 4.80E-01 | NA         |
| Calcium signaling pathway | P2RX1 | rs9904166  | subcutaneous adipose | 4.50E-06              | NA             | 2.80E-01 | NA         |
| Calcium signaling pathway | P2RX2 | rs5744750  | omental adipose      | 8.80E-06              | 5.40E-01       | 2.50E-02 | 3.38E-01   |
| Calcium signaling pathway | P2RX3 | rs10400305 | liver                | 1.30E-05              | 1.90E-01       | 2.70E-01 | 3.53E-01   |
| Calcium signaling pathway | P2RX4 | rs1180051  | liver                | 2.10E-09              | 1.10E-01       | 6.10E-02 | 4.80E-01   |
| Calcium signaling pathway | P2RX4 | rs1180051  | omental adipose      | 1.00E-08              | 1.10E-01       | 6.10E-02 | 4.80E-01   |
| Calcium signaling pathway | P2RX4 | rs1180051  | subcutaneous adipose | 5.90E-06              | 1.10E-01       | 6.10E-02 | 4.80E-01   |
| Calcium signaling pathway | P2RX7 | rs1180012  | liver                | 1.90E-05              | 6.50E-01       | 6.70E-01 | 7.75E-01   |
| Calcium signaling pathway | PDE1A | rs6711862  | omental adipose      | 3.20E-20              | 1.70E-03       | 2.30E-02 | 1.18E-02   |
| Calcium signaling pathway | PDE1A | rs6711862  | subcutaneous adipose | 1.50E-10              | 1.70E-03       | 2.30E-02 | 1.18E-02   |
| Calcium signaling pathway | PDE1B | rs4759088  | liver                | 8.90E-05              | NA             | 7.60E-02 | NA         |
| Calcium signaling pathway | PDE1C | rs4551232  | omental adipose      | 9.70E-05              | 9.20E-01       | 1.40E-01 | 2.93E-01   |
| Calcium signaling pathway | PHKG1 | rs7778601  | liver                | 9.30E-08              | 9.40E-02       | 2.30E-02 | 6.25E-01   |
| Calcium signaling pathway | PHKG2 | rs9934806  | liver                | 2.80E-07              | 9.30E-01       | 4.00E-01 | 5.78E-01   |
| Calcium signaling pathway | PLCB1 | rs978266   | subcutaneous adipose | 0.00012               | 0.47           | 0.021    | 0.39028309 |
| Calcium signaling pathway | PLCB2 | rs3743033  | liver                | 0                     | 0.23           | 0.47     | 0.2792028  |
| Calcium signaling pathway | PLCD1 | rs11129780 | subcutaneous adipose | 7.20E-08              | 2.40E-01       | 5.40E-02 | 9.40E-01   |

| Pathway                   | Gene   | eSNP       | Tissue               | SNP-Expression Pvalue | SNP-T2D Pvalue |          |            |
|---------------------------|--------|------------|----------------------|-----------------------|----------------|----------|------------|
|                           |        |            |                      |                       | DIAGRAM        | WTCCC    | Non-WTCCC  |
| Calcium signaling pathway | PLCD3  | rs12450321 | subcutaneous adipose | 7.40E-06              | 8.50E-01       | 2.40E-01 | 4.93E-01   |
| Calcium signaling pathway | PLCD4  | rs2279014  | liver                | 3.70E-05              | 8.00E-01       | 1.20E-02 | 9.41E-02   |
| Calcium signaling pathway | PLCE1  | rs11593126 | omental adipose      | 5.90E-05              | 5.20E-01       | 2.10E-01 | 9.06E-01   |
| Calcium signaling pathway | PLCG2  | rs4074445  | subcutaneous adipose | 6.50E-05              | NA             | 1.60E-01 | NA         |
| Calcium signaling pathway | PPID   | rs12505475 | omental adipose      | 2.80E-07              | 1.70E-01       | 1.80E-01 | 4.11E-01   |
| Calcium signaling pathway | PPID   | rs7689418  | omental adipose      | 1.10E-08              | 1.70E-01       | 1.80E-01 | 4.11E-01   |
| Calcium signaling pathway | PPP3CA | rs3804357  | liver                | 1.80E-12              | 2.10E-01       | 4.30E-01 | 2.70E-01   |
| Calcium signaling pathway | PPP3CC | rs17733133 | omental adipose      | 2.60E-06              | NA             | 2.10E-01 | NA         |
| Calcium signaling pathway | PPP3CC | rs17733133 | subcutaneous adipose | 9.60E-05              | NA             | 2.10E-01 | NA         |
| Calcium signaling pathway | PPP3R1 | rs6758449  | omental adipose      | 7.60E-05              | 8.30E-01       | 4.40E-01 | 7.45E-01   |
| Calcium signaling pathway | PRKACB | rs678794   | liver                | 1.10E-06              | 9.40E-01       | 7.30E-01 | 8.62E-01   |
| Calcium signaling pathway | PRKCA  | rs16960228 | liver                | 1.60E-06              | 5.30E-01       | 1.90E-03 | 1.02E-01   |
| Calcium signaling pathway | PRKCB1 | rs12931116 | subcutaneous adipose | 2.70E-06              | 2.50E-01       | 3.20E-01 | 4.28E-01   |
| Calcium signaling pathway | PTAFR  | rs1053107  | omental adipose      | 7.90E-07              | 8.20E-01       | 3.10E-01 | 6.15E-01   |
| Calcium signaling pathway | PTGER3 | rs1891417  | subcutaneous adipose | 2.50E-05              | 2.10E-01       | 2.60E-01 | 4.06E-01   |
| Calcium signaling pathway | PTGER3 | rs2796200  | subcutaneous adipose | 4.50E-05              | 2.60E-01       | 2.60E-01 | 5.13E-01   |
| Calcium signaling pathway | PTGFR  | rs12737480 | liver                | 9.30E-07              | 6.30E-01       | 1.30E-01 | 5.80E-01   |
| Calcium signaling pathway | RYR1   | rs2163823  | subcutaneous adipose | 5.00E-06              | 7.50E-01       | 1.60E-01 | 4.90E-01   |
| Calcium signaling pathway | RYR2   | rs3011566  | liver                | 0                     | 0.23           | 0.093    | 0.75641899 |

| Pathway                   | Gene    | eSNP       | Tissue               | SNP-Expression Pvalue | SNP-T2D Pvalue |          |           |
|---------------------------|---------|------------|----------------------|-----------------------|----------------|----------|-----------|
|                           |         |            |                      |                       | DIAGRAM        | WTCCC    | Non-WTCCC |
| Calcium signaling pathway | RYR3    | rs8041171  | subcutaneous adipose | 1.10E-05              | 1.40E-02       | 1.40E-01 | 2.66E-02  |
| Calcium signaling pathway | SPHK2   | rs11880333 | omental adipose      | 3.90E-05              | NA             | 5.40E-01 | NA        |
| Calcium signaling pathway | TACR2   | rs4745987  | omental adipose      | 3.50E-07              | 1.00E-01       | 2.80E-01 | 1.59E-01  |
| Calcium signaling pathway | VDAC1   | rs4958208  | liver                | 2.70E-06              | 9.90E-01       | 6.80E-01 | 7.53E-01  |
| Cell Communication        | ACTG1   | rs7342974  | liver                | 0                     | 0.38           | 0.18     | 0.8915344 |
| Cell Communication        | ACTG1   | rs7342974  | liver                | 3.00E-30              | 3.80E-01       | 1.80E-01 | 8.92E-01  |
| Cell Communication        | CHAD    | rs11869714 | liver                | 1.90E-12              | 6.90E-01       | 2.10E-01 | 6.47E-01  |
| Cell Communication        | COL11A2 | rs213213   | liver                | 4.20E-07              | 8.10E-01       | 5.40E-01 | 8.72E-01  |
| Cell Communication        | COL2A1  | rs4760683  | omental adipose      | 1.50E-05              | 4.70E-01       | 4.50E-01 | 6.94E-01  |
| Cell Communication        | COL4A1  | rs599483   | omental adipose      | 9.70E-05              | 8.80E-02       | 2.30E-01 | 1.62E-01  |
| Cell Communication        | COL4A2  | rs387298   | omental adipose      | 4.30E-08              | 2.80E-01       | 7.40E-02 | 9.54E-01  |
| Cell Communication        | COL4A2  | rs387298   | subcutaneous adipose | 4.80E-08              | 2.80E-01       | 7.40E-02 | 9.54E-01  |
| Cell Communication        | COL4A4  | rs1574248  | subcutaneous adipose | 4.00E-21              | 9.00E-02       | 2.20E-04 | 5.30E-01  |
| Cell Communication        | COL5A1  | rs9410002  | subcutaneous adipose | 7.90E-05              | NA             | 6.20E-01 | NA        |
| Cell Communication        | COL5A2  | rs1356168  | omental adipose      | 1.40E-05              | 1.40E-01       | 2.50E-02 | 8.11E-01  |
| Cell Communication        | COL5A3  | rs889130   | subcutaneous adipose | 4.70E-06              | NA             | 5.20E-02 | NA        |
| Cell Communication        | COL6A1  | rs1736424  | omental adipose      | 6.80E-05              | 5.40E-01       | 2.80E-01 | 9.83E-01  |
| Cell Communication        | COL6A2  | rs2839160  | subcutaneous adipose | 4.40E-06              | 3.30E-01       | 2.10E-01 | 7.34E-01  |
| Cell Communication        | DSC2    | rs4799305  | omental adipose      | 1.30E-05              | 4.00E-01       | 2.40E-01 | 8.26E-01  |
| Cell Communication        | DSC3    | rs2047082  | omental adipose      | 6.40E-05              | NA             | 1.40E-01 | NA        |
| Cell Communication        | DSG1    | rs1426308  | liver                | 5.80E-05              | 7.30E-01       | 1.40E-01 | 4.77E-01  |
| Cell Communication        | DSG2    | rs1031729  | liver                | 8.30E-05              | 4.30E-01       | 2.30E-01 | 8.99E-01  |
| Cell Communication        | FN1     | rs6753702  | liver                | 4.20E-05              | 4.10E-02       | 3.50E-02 | 2.57E-01  |
| Cell Communication        | GJA1    | rs2679651  | subcutaneous adipose | 2.60E-05              | 6.00E-01       | 1.20E-01 | 5.99E-01  |
| Cell Communication        | GJA10   | rs13374459 | subcutaneous adipose | 8.50E-05              | 1.00E-02       | 3.90E-02 | 5.64E-02  |
| Cell Communication        | GJA4    | rs12076918 | liver                | 4.50E-05              | NA             | 1.80E-01 | NA        |
| Cell Communication        | GJA5    | rs1908627  | omental adipose      | 7.80E-17              | 5.90E-01       | 6.80E-01 | 6.78E-01  |
| Cell Communication        | GJA5    | rs1908627  | subcutaneous adipose | 5.10E-07              | 5.90E-01       | 6.80E-01 | 6.78E-01  |

| Pathway            | Gene  | eSNP       | Tissue               | SNP-Expression Pvalue | SNP-T2D Pvalue |          |            |
|--------------------|-------|------------|----------------------|-----------------------|----------------|----------|------------|
|                    |       |            |                      |                       | DIAGRAM        | WTCCC    | Non-WTCCC  |
| Cell Communication | GJA7  | rs4239142  | omental adipose      | 6.80E-05              | 1.80E-01       | 1.50E-02 | 9.19E-01   |
| Cell Communication | IBSP  | rs340643   | subcutaneous adipose | 0.00012               | 0.72           | 0.9      | 0.69225874 |
| Cell Communication | ITGA6 | rs1882165  | liver                | 1.00E-04              | 6.20E-01       | 4.40E-01 | 9.48E-01   |
| Cell Communication | KRT1  | rs17118093 | omental adipose      | 5.80E-14              | NA             | 3.10E-04 | NA         |
| Cell Communication | KRT1  | rs17118093 | subcutaneous adipose | 2.40E-08              | NA             | 3.10E-04 | NA         |
| Cell Communication | KRT10 | rs1558282  | subcutaneous adipose | 3.50E-05              | 8.50E-01       | 2.10E-01 | 4.54E-01   |
| Cell Communication | KRT12 | rs2239710  | liver                | 9.30E-05              | 3.80E-01       | 9.80E-01 | 2.31E-01   |
| Cell Communication | KRT16 | rs4796588  | omental adipose      | 1.90E-06              | 5.80E-01       | 3.50E-01 | 9.89E-01   |
| Cell Communication | KRT16 | rs4796588  | subcutaneous adipose | 1.50E-25              | 5.80E-01       | 3.50E-01 | 9.89E-01   |
| Cell Communication | KRT16 | rs7208807  | omental adipose      | 2.60E-06              | 5.50E-01       | 3.50E-01 | 9.40E-01   |
| Cell Communication | KRT16 | rs7208807  | subcutaneous adipose | 4.80E-25              | 5.50E-01       | 3.50E-01 | 9.40E-01   |
| Cell Communication | KRT23 | rs1859251  | omental adipose      | 0.00011               | 0.19           | 0.9      | 0.08612267 |
| Cell Communication | KRT24 | rs2014704  | omental adipose      | 8.60E-06              | 9.80E-01       | 1.90E-01 | 3.07E-01   |
| Cell Communication | KRT27 | rs17558560 | omental adipose      | 3.30E-09              | 1.70E-01       | 1.30E-01 | 4.95E-01   |
| Cell Communication | KRT31 | rs7223332  | omental adipose      | 0.00011               | 1              | 0.25     | 0.35362011 |
| Cell Communication | KRT32 | rs11652600 | liver                | 4.10E-05              | 6.00E-01       | 2.20E-01 | 7.94E-01   |
| Cell Communication | KRT32 | rs4796754  | liver                | 5.90E-05              | 6.70E-01       | 2.20E-01 | 6.91E-01   |
| Cell Communication | KRT5  | rs3847831  | omental adipose      | 1.10E-08              | 3.20E-02       | 1.90E-02 | 2.79E-01   |
| Cell Communication | KRT6A | rs1907671  | liver                | 2.60E-05              | 9.90E-01       | 9.10E-02 | 1.78E-01   |
| Cell Communication | KRT6C | rs607860   | omental adipose      | 9.60E-06              | 1.10E-02       | 5.20E-03 | 2.03E-01   |
| Cell Communication | KRT7  | rs6580870  | omental adipose      | 0.00013               | 0.11           | 0.0069   | 0.96973766 |
| Cell Communication | KRT73 | rs17117158 | subcutaneous adipose | 3.70E-05              | 6.70E-01       | 2.70E-01 | 7.65E-01   |
| Cell Communication | KRT77 | rs10783528 | subcutaneous adipose | 2.20E-06              | 5.90E-01       | 4.00E-01 | 9.45E-01   |
| Cell Communication | KRT8  | rs11170319 | liver                | 1.00E-04              | 8.00E-01       | 1.00E-01 | 3.30E-01   |
| Cell Communication | LAMA1 | rs2567259  | subcutaneous adipose | 2.60E-05              | 3.20E-02       | 1.90E-01 | 5.52E-02   |
| Cell Communication | LAMA3 | rs11662907 | omental adipose      | 1.50E-10              | 8.50E-01       | 1.20E-01 | 3.21E-01   |
| Cell Communication | LAMA4 | rs925755   | liver                | 9.40E-05              | 1.80E-01       | 5.30E-01 | 1.76E-01   |
| Cell Communication | LAMA5 | rs10460672 | liver                | 5.70E-06              | 1.00E-02       | 2.00E-02 | 8.98E-02   |
| Cell Communication | LAMB1 | rs4730287  | liver                | 6.60E-19              | 2.90E-01       | 2.70E-02 | 7.52E-01   |
| Cell Communication | LAMB3 | rs2298928  | subcutaneous adipose | 0.00011               | 0.93           | 0.17     | 0.32479185 |



| Pathway                             | Gene   | eSNP       | Tissue               | SNP-Expression Pvalue | SNP-T2D Pvalue |          |            |
|-------------------------------------|--------|------------|----------------------|-----------------------|----------------|----------|------------|
|                                     |        |            |                      |                       | DIAGRAM        | WTCCC    | Non-WTCCC  |
| Cell Communication                  | LAMB4  | rs1636958  | omental adipose      | 5.40E-05              | 6.60E-01       | 4.30E-01 | 9.79E-01   |
| Cell Communication                  | LAMC1  | rs9425569  | liver                | 6.90E-05              | 4.50E-02       | 1.10E-01 | 1.36E-01   |
| Cell Communication                  | LAMC1  | rs9425569  | omental adipose      | 1.20E-12              | 4.50E-02       | 1.10E-01 | 1.36E-01   |
| Cell Communication                  | LAMC1  | rs9425569  | subcutaneous adipose | 8.00E-17              | 4.50E-02       | 1.10E-01 | 1.36E-01   |
| Cell Communication                  | LAMC2  | rs12739316 | omental adipose      | 3.80E-14              | NA             | 2.20E-01 | NA         |
| Cell Communication                  | LAMC3  | rs3765567  | omental adipose      | 6.40E-05              | 6.50E-01       | 4.90E-01 | 9.42E-01   |
| Cell Communication                  | RELN   | rs7787675  | subcutaneous adipose | 7.70E-05              | 6.10E-01       | 2.50E-01 | 8.26E-01   |
| Cell Communication                  | SPP1   | rs1463091  | liver                | 4.60E-06              | 3.60E-03       | 2.00E-03 | 1.22E-01   |
| Cell Communication                  | THBS1  | rs11070174 | omental adipose      | 4.10E-05              | 8.30E-01       | 4.10E-01 | 7.14E-01   |
| Cell Communication                  | THBS2  | rs2494673  | omental adipose      | 1.60E-05              | NA             | 8.70E-01 | NA         |
| Cell Communication                  | THBS3  | rs4246529  | subcutaneous adipose | 3.40E-05              | 2.90E-01       | 1.10E-01 | 8.58E-01   |
| Cell Communication                  | THBS4  | rs11749003 | omental adipose      | 0.00012               | 0.3            | 0.052    | 0.89695784 |
| Cell Communication                  | TNC    | rs1335332  | liver                | 1.00E-10              | 4.60E-01       | 6.10E-02 | 6.27E-01   |
| Cell Communication                  | TNN    | rs6696455  | omental adipose      | 8.90E-05              | 8.20E-02       | 3.40E-02 | 4.82E-01   |
| Cell Communication                  | TNN    | rs6696455  | subcutaneous adipose | 1.30E-05              | 8.20E-02       | 3.40E-02 | 4.82E-01   |
| Cell Communication                  | TNXB   | rs2596503  | omental adipose      | 1.00E-04              | 2.40E-03       | 3.20E-03 | 6.68E-02   |
| Cell Communication                  | VIM    | rs359288   | liver                | 4.60E-06              | 2.60E-01       | 1.90E-01 | 6.13E-01   |
| Complement and coagulation cascades | A2M    | rs12822596 | omental adipose      | 2.00E-05              | 9.50E-01       | 2.00E-01 | 3.44E-01   |
| Complement and coagulation cascades | A2M    | rs7309821  | omental adipose      | 2.10E-05              | 9.40E-01       | 2.00E-01 | 3.53E-01   |
| Complement and coagulation cascades | BDKRB2 | rs4349080  | subcutaneous adipose | 2.20E-05              | 1.40E-01       | 2.10E-01 | 3.00E-01   |
| Complement and coagulation cascades | C1QC   | rs17433871 | liver                | 2.70E-06              | 1.60E-01       | 3.00E-01 | 2.66E-01   |
| Complement and coagulation cascades | C1QC   | rs17433871 | omental adipose      | 2.80E-06              | 1.60E-01       | 3.00E-01 | 2.66E-01   |
| Complement and coagulation cascades | C1QC   | rs17433871 | subcutaneous adipose | 1.50E-06              | 1.60E-01       | 3.00E-01 | 2.66E-01   |
| Complement and coagulation cascades | C2     | rs3130531  | omental adipose      | 6.80E-05              | 5.10E-02       | 2.30E-02 | 3.83E-01   |

| Pathway                             | Gene  | eSNP       | Tissue               | SNP-Expression Pvalue | SNP-T2D Pvalue |          |           |
|-------------------------------------|-------|------------|----------------------|-----------------------|----------------|----------|-----------|
|                                     |       |            |                      |                       | DIAGRAM        | WTCCC    | Non-WTCCC |
| Complement and coagulation cascades | C4A   | rs1077394  | liver                | 2.70E-07              | 2.10E-05       | 5.50E-04 | 1.85E-03  |
| Complement and coagulation cascades | C4A   | rs1077394  | omental adipose      | 1.70E-09              | 2.10E-05       | 5.50E-04 | 1.85E-03  |
| Complement and coagulation cascades | C4A   | rs1077394  | subcutaneous adipose | 2.00E-10              | 2.10E-05       | 5.50E-04 | 1.85E-03  |
| Complement and coagulation cascades | C4B   | rs1077394  | liver                | 2.20E-05              | 2.10E-05       | 5.50E-04 | 1.85E-03  |
| Complement and coagulation cascades | C4B   | rs1077394  | omental adipose      | 3.20E-08              | 2.10E-05       | 5.50E-04 | 1.85E-03  |
| Complement and coagulation cascades | C4B   | rs1077394  | subcutaneous adipose | 8.20E-10              | 2.10E-05       | 5.50E-04 | 1.85E-03  |
| Complement and coagulation cascades | C4BPA | rs6690037  | liver                | 3.80E-06              | 6.80E-01       | 7.20E-02 | 3.80E-01  |
| Complement and coagulation cascades | C4BPA | rs6690037  | omental adipose      | 8.50E-08              | 6.80E-01       | 7.20E-02 | 3.80E-01  |
| Complement and coagulation cascades | C4BPB | rs6690037  | omental adipose      | 3.70E-14              | 6.80E-01       | 7.20E-02 | 3.80E-01  |
| Complement and coagulation cascades | C4BPB | rs6690037  | subcutaneous adipose | 1.80E-09              | 6.80E-01       | 7.20E-02 | 3.80E-01  |
| Complement and coagulation cascades | C5    | rs10818503 | subcutaneous adipose | 1.70E-05              | 8.80E-03       | 4.50E-03 | 1.79E-01  |
| Complement and coagulation cascades | C6    | rs749629   | omental adipose      | 1.40E-05              | 5.00E-01       | 3.00E-02 | 4.15E-01  |
| Complement and coagulation cascades | C6    | rs749629   | subcutaneous adipose | 8.70E-07              | 5.00E-01       | 3.00E-02 | 4.15E-01  |
| Complement and coagulation cascades | C7    | rs391781   | liver                | 5.00E-05              | 8.20E-01       | 6.20E-01 | 9.33E-01  |
| Complement and coagulation cascades | C7    | rs391781   | omental adipose      | 6.60E-06              | 8.20E-01       | 6.20E-01 | 9.33E-01  |
| Complement and coagulation cascades | C8B   | rs679350   | liver                | 9.00E-11              | 4.70E-01       | 1.40E-02 | 3.27E-01  |
| Complement and coagulation cascades | C8G   | rs4880158  | liver                | 5.60E-05              | 1.80E-02       | 2.10E-02 | 1.56E-01  |

| Pathway                             | Gene | eSNP       | Tissue               | SNP-Expression Pvalue | SNP-T2D Pvalue |          |           |
|-------------------------------------|------|------------|----------------------|-----------------------|----------------|----------|-----------|
|                                     |      |            |                      |                       | DIAGRAM        | WTCCC    | Non-WTCCC |
| Complement and coagulation cascades | C8G  | rs4880162  | liver                | 5.60E-05              | 1.90E-02       | 2.10E-02 | 1.64E-01  |
| Complement and coagulation cascades | C9   | rs10512696 | omental adipose      | 8.30E-08              | 6.00E-01       | 4.00E-01 | 9.61E-01  |
| Complement and coagulation cascades | CD46 | rs7144     | liver                | 2.80E-05              | 6.30E-01       | 1.60E-02 | 2.03E-01  |
| Complement and coagulation cascades | CD55 | rs6672985  | liver                | 3.40E-06              | 3.10E-01       | 1.50E-01 | 8.05E-01  |
| Complement and coagulation cascades | CD59 | rs704700   | liver                | 2.80E-08              | 4.60E-02       | 1.40E-02 | 4.32E-01  |
| Complement and coagulation cascades | CD59 | rs704700   | omental adipose      | 8.00E-08              | 4.60E-02       | 1.40E-02 | 4.32E-01  |
| Complement and coagulation cascades | CD59 | rs704700   | subcutaneous adipose | 7.00E-06              | 4.60E-02       | 1.40E-02 | 4.32E-01  |
| Complement and coagulation cascades | CFB  | rs1265093  | omental adipose      | 9.00E-06              | 1.70E-02       | 3.60E-02 | 1.05E-01  |
| Complement and coagulation cascades | CFD  | rs1683591  | liver                | 5.50E-13              | 7.60E-01       | 1.50E-01 | 4.61E-01  |
| Complement and coagulation cascades | CFH  | rs4085749  | omental adipose      | 2.70E-07              | 8.40E-01       | 8.90E-02 | 2.75E-01  |
| Complement and coagulation cascades | CFH  | rs4085749  | subcutaneous adipose | 3.90E-05              | 8.40E-01       | 8.90E-02 | 2.75E-01  |
| Complement and coagulation cascades | CFI  | rs3181187  | liver                | 3.80E-05              | 8.50E-01       | 3.20E-02 | 1.42E-01  |
| Complement and coagulation cascades | CPB2 | rs718530   | liver                | 9.00E-07              | 1.60E-01       | 6.20E-02 | 6.57E-01  |
| Complement and coagulation cascades | CR1  | rs1323720  | liver                | 1.10E-09              | 6.30E-03       | 6.30E-03 | 1.13E-01  |
| Complement and coagulation cascades | CR1  | rs1323720  | omental adipose      | 1.40E-06              | 6.30E-03       | 6.30E-03 | 1.13E-01  |
| Complement and coagulation cascades | CR1  | rs1323720  | subcutaneous adipose | 7.50E-10              | 6.30E-03       | 6.30E-03 | 1.13E-01  |
| Complement and coagulation cascades | F10  | rs3024718  | omental adipose      | 6.00E-05              | 4.70E-01       | 3.70E-02 | 4.97E-01  |

| Pathway                             | Gene  | eSNP       | Tissue               | SNP-Expression Pvalue | SNP-T2D Pvalue |          |            |
|-------------------------------------|-------|------------|----------------------|-----------------------|----------------|----------|------------|
|                                     |       |            |                      |                       | DIAGRAM        | WTCCC    | Non-WTCCC  |
| Complement and coagulation cascades | F11   | rs3822058  | liver                | 0                     | 0.83           | 0.058    | 0.21837794 |
| Complement and coagulation cascades | F11   | rs3822058  | liver                | 1.50E-21              | 8.30E-01       | 5.80E-02 | 2.18E-01   |
| Complement and coagulation cascades | F12   | rs6420094  | liver                | 3.10E-06              | 6.90E-01       | 1.60E-01 | 5.62E-01   |
| Complement and coagulation cascades | F13A1 | rs1058242  | liver                | 9.50E-05              | 6.90E-01       | 2.20E-02 | 1.96E-01   |
| Complement and coagulation cascades | F13B  | rs4085749  | liver                | 1.70E-19              | 8.40E-01       | 8.90E-02 | 2.75E-01   |
| Complement and coagulation cascades | F2    | rs2291443  | liver                | 9.50E-06              | 5.30E-01       | 4.20E-01 | 8.25E-01   |
| Complement and coagulation cascades | F2R   | rs250760   | omental adipose      | 4.80E-05              | 3.50E-02       | 2.20E-01 | 5.30E-02   |
| Complement and coagulation cascades | F5    | rs3917744  | omental adipose      | 1.40E-05              | 1.80E-02       | 1.80E-01 | 2.78E-02   |
| Complement and coagulation cascades | F7    | rs12583706 | liver                | 4.30E-05              | 1.10E-01       | 1.50E-01 | 2.91E-01   |
| Complement and coagulation cascades | FGB   | rs2227401  | liver                | 9.40E-18              | 2.20E-01       | 1.10E-01 | 6.80E-01   |
| Complement and coagulation cascades | FGG   | rs4463047  | liver                | 1.20E-05              | NA             | 1.00E-01 | NA         |
| Complement and coagulation cascades | KLK3  | rs2735839  | subcutaneous adipose | 8.30E-05              | 8.00E-01       | 7.90E-02 | 2.87E-01   |
| Complement and coagulation cascades | KLKB1 | rs3822058  | omental adipose      | 4.20E-05              | 8.30E-01       | 5.80E-02 | 2.18E-01   |
| Complement and coagulation cascades | MASP1 | rs698084   | omental adipose      | 3.10E-11              | 5.00E-01       | 5.40E-02 | 5.36E-01   |
| Complement and coagulation cascades | MASP1 | rs698084   | subcutaneous adipose | 4.60E-23              | 5.00E-01       | 5.40E-02 | 5.36E-01   |
| Complement and coagulation cascades | MASP2 | rs1033638  | liver                | 0                     | 0.12           | 0.056    | 0.53840684 |
| Complement and coagulation cascades | MASP2 | rs1033638  | liver                | 5.40E-37              | 1.20E-01       | 5.60E-02 | 5.38E-01   |

| Pathway                             | Gene     | eSNP       | Tissue               | SNP-Expression Pvalue | SNP-T2D Pvalue |          |            |
|-------------------------------------|----------|------------|----------------------|-----------------------|----------------|----------|------------|
|                                     |          |            |                      |                       | DIAGRAM        | WTCCC    | Non-WTCCC  |
| Complement and coagulation cascades | MBL2     | rs12258303 | liver                | 6.80E-07              | 1.50E-01       | 1.80E-02 | 9.29E-01   |
| Complement and coagulation cascades | PLAT     | rs7015100  | liver                | 8.30E-05              | 9.80E-01       | 3.70E-01 | 4.91E-01   |
| Complement and coagulation cascades | PLAT     | rs7015100  | subcutaneous adipose | 9.80E-05              | 9.80E-01       | 3.70E-01 | 4.91E-01   |
| Complement and coagulation cascades | PROC     | rs6755028  | liver                | 6.90E-05              | 1.00E+00       | 5.80E-01 | 6.55E-01   |
| Complement and coagulation cascades | PROS1    | rs9289536  | omental adipose      | 9.90E-06              | 5.70E-01       | 5.60E-01 | 7.51E-01   |
| Complement and coagulation cascades | PROS1    | rs9289536  | subcutaneous adipose | 7.10E-05              | 5.70E-01       | 5.60E-01 | 7.51E-01   |
| Complement and coagulation cascades | SERPINA1 | rs760335   | liver                | 7.90E-05              | 9.00E-01       | 1.60E-01 | 3.38E-01   |
| Complement and coagulation cascades | SERPINA1 | rs760335   | omental adipose      | 0.00012               | 0.9            | 0.16     | 0.33770148 |
| Complement and coagulation cascades | SERPINA1 | rs760335   | subcutaneous adipose | 3.90E-05              | 9.00E-01       | 1.60E-01 | 3.38E-01   |
| Complement and coagulation cascades | SERPINA5 | rs1955656  | liver                | 8.60E-05              | 9.10E-01       | 1.20E-01 | 2.73E-01   |
| Complement and coagulation cascades | SERPINC1 | rs1884994  | omental adipose      | 1.10E-09              | 9.10E-01       | 1.50E-01 | 3.15E-01   |
| Complement and coagulation cascades | SERPINC1 | rs1884994  | subcutaneous adipose | 1.20E-14              | 9.10E-01       | 1.50E-01 | 3.15E-01   |
| Complement and coagulation cascades | SERPIND1 | rs9612573  | omental adipose      | 2.10E-06              | 6.80E-01       | 5.20E-02 | 3.20E-01   |
| Complement and coagulation cascades | SERPINF2 | rs11657222 | omental adipose      | 4.80E-21              | NA             | 1.90E-01 | NA         |
| Complement and coagulation cascades | SERPINF2 | rs11657222 | subcutaneous adipose | 1.60E-14              | NA             | 1.90E-01 | NA         |
| Complement and coagulation cascades | TFPI     | rs12104503 | omental adipose      | 8.60E-05              | 6.10E-01       | 2.00E-01 | 7.44E-01   |
| Ether lipid metabolism              | AGPAT3   | rs743463   | subcutaneous adipose | 5.00E-05              | 2.70E-01       | 3.50E-01 | 4.38E-01   |
| Ether lipid metabolism              | AGPAT4   | rs3798923  | liver                | 1.40E-06              | 5.90E-01       | 1.60E-01 | 7.00E-01   |

| Pathway                | Gene     | eSNP       | Tissue               | SNP-Expression Pvalue | SNP-T2D Pvalue |          |            |
|------------------------|----------|------------|----------------------|-----------------------|----------------|----------|------------|
|                        |          |            |                      |                       | DIAGRAM        | WTCCC    | Non-WTCCC  |
| Ether lipid metabolism | AGPAT6   | rs919035   | liver                | 1.10E-11              | 3.20E-03       | 1.40E-01 | 3.75E-03   |
| Ether lipid metabolism | AGPS     | rs13404970 | subcutaneous adipose | 8.60E-05              | 4.40E-01       | 1.10E-02 | 3.27E-01   |
| Ether lipid metabolism | CHPT1    | rs10823    | liver                | 6.90E-05              | 2.60E-01       | 2.70E-01 | 5.01E-01   |
| Ether lipid metabolism | CHPT1    | rs10823    | omental adipose      | 5.10E-11              | 2.60E-01       | 2.70E-01 | 5.01E-01   |
| Ether lipid metabolism | ENPP6    | rs4241784  | omental adipose      | 1.70E-05              | 3.90E-01       | 1.10E-01 | 9.23E-01   |
| Ether lipid metabolism | ENPP6    | rs4241784  | subcutaneous adipose | 1.60E-06              | 3.90E-01       | 1.10E-01 | 9.23E-01   |
| Ether lipid metabolism | LYCAT    | rs7583600  | liver                | 1.20E-12              | 1.30E-02       | 8.40E-04 | 4.52E-01   |
| Ether lipid metabolism | LYCAT    | rs7583600  | omental adipose      | 2.00E-05              | 1.30E-02       | 8.40E-04 | 4.52E-01   |
| Ether lipid metabolism | LYCAT    | rs7583600  | subcutaneous adipose | 9.60E-09              | 1.30E-02       | 8.40E-04 | 4.52E-01   |
| Ether lipid metabolism | PAFAH1B1 | rs4790344  | subcutaneous adipose | 1.60E-06              | 4.70E-01       | 3.30E-02 | 4.73E-01   |
| Ether lipid metabolism | PAFAH1B2 | rs12271161 | subcutaneous adipose | 7.10E-07              | 1.00E-01       | 1.50E-01 | 2.63E-01   |
| Ether lipid metabolism | PAFAH2   | rs11247954 | liver                | 2.50E-06              | NA             | 8.90E-02 | NA         |
| Ether lipid metabolism | PLA2G12A | rs6533444  | omental adipose      | 3.90E-10              | 5.30E-01       | 2.80E-03 | 1.24E-01   |
| Ether lipid metabolism | PLA2G1B  | rs10774518 | subcutaneous adipose | 9.80E-05              | 4.80E-01       | 6.30E-01 | 5.54E-01   |
| Ether lipid metabolism | PLA2G1B  | rs10774519 | subcutaneous adipose | 4.30E-05              | 5.10E-01       | 6.30E-01 | 5.99E-01   |
| Ether lipid metabolism | PLA2G2A  | rs6672057  | liver                | 6.80E-18              | 8.60E-01       | 2.40E-02 | 1.15E-01   |
| Ether lipid metabolism | PLA2G4A  | rs6683416  | omental adipose      | 7.90E-10              | 1.00E-01       | 2.20E-01 | 1.96E-01   |
| Ether lipid metabolism | PLA2G4A  | rs6683416  | subcutaneous adipose | 3.60E-06              | 1.00E-01       | 2.20E-01 | 1.96E-01   |
| Ether lipid metabolism | PLA2G4B  | rs2303518  | omental adipose      | 0.00011               | 0.019          | 0.003    | 0.38990595 |
| Ether lipid metabolism | PLA2G5   | rs17402685 | subcutaneous adipose | 1.10E-05              | 9.30E-01       | 8.00E-02 | 1.97E-01   |
| Ether lipid metabolism | PLA2G6   | rs132966   | liver                | 0                     | NA             | 0.68     | NA         |
| Ether lipid metabolism | PLD1     | rs4894512  | subcutaneous adipose | 1.00E-04              | 9.60E-01       | 2.60E-01 | 4.02E-01   |
| Ether lipid metabolism | PLD2     | rs2286670  | liver                | 2.40E-06              | NA             | 1.00E-01 | NA         |
| Ether lipid metabolism | PLD2     | rs2286670  | omental adipose      | 2.70E-06              | NA             | 1.00E-01 | NA         |
| Ether lipid metabolism | PLD2     | rs2286670  | subcutaneous adipose | 1.10E-09              | NA             | 1.00E-01 | NA         |
| Ether lipid metabolism | PPAP2A   | rs231622   | omental adipose      | 2.70E-06              | 2.60E-01       | 4.30E-02 | 9.44E-01   |
| Ether lipid metabolism | PPAP2B   | rs1777276  | omental adipose      | 6.50E-05              | 9.60E-01       | 4.90E-01 | 6.26E-01   |
| Ether lipid metabolism | PPAP2C   | rs11878315 | omental adipose      | 6.30E-27              | 6.20E-01       | 1.40E-01 | 6.15E-01   |
| Ether lipid metabolism | PPAP2C   | rs11878315 | subcutaneous adipose | 2.20E-15              | 6.20E-01       | 1.40E-01 | 6.15E-01   |

| Pathway                            | Gene    | eSNP       | Tissue               | SNP-Expression Pvalue | SNP-T2D Pvalue |          |            |
|------------------------------------|---------|------------|----------------------|-----------------------|----------------|----------|------------|
|                                    |         |            |                      |                       | DIAGRAM        | WTCCC    | Non-WTCCC  |
| Glycan structures - biosynthesis 1 | ALG1    | rs3760030  | liver                | 7.60E-34              | NA             | 3.30E-01 | NA         |
| Glycan structures - biosynthesis 1 | ALG1    | rs3760030  | omental adipose      | 7.10E-42              | NA             | 3.30E-01 | NA         |
| Glycan structures - biosynthesis 1 | ALG1    | rs3760030  | subcutaneous adipose | 1.80E-33              | NA             | 3.30E-01 | NA         |
| Glycan structures - biosynthesis 1 | ALG10   | rs11053254 | liver                | 2.40E-06              | 5.20E-01       | 9.20E-02 | 6.41E-01   |
| Glycan structures - biosynthesis 1 | ALG11   | rs6650384  | liver                | 0                     | 0.42           | 0.52     | 0.54877316 |
| Glycan structures - biosynthesis 1 | ALG12   | rs6009870  | omental adipose      | 4.90E-06              | NA             | 1.10E-01 | NA         |
| Glycan structures - biosynthesis 1 | ALG14   | rs3789445  | subcutaneous adipose | 1.40E-05              | 5.30E-02       | 6.10E-04 | 9.36E-01   |
| Glycan structures - biosynthesis 1 | ALG3    | rs17774396 | omental adipose      | 4.20E-09              | NA             | 3.20E-02 | NA         |
| Glycan structures - biosynthesis 1 | ALG3    | rs17774396 | subcutaneous adipose | 2.70E-08              | NA             | 3.20E-02 | NA         |
| Glycan structures - biosynthesis 1 | ALG6    | rs3004318  | omental adipose      | 4.00E-05              | 9.30E-01       | 3.70E-01 | 5.48E-01   |
| Glycan structures - biosynthesis 1 | ALG8    | rs567697   | liver                | 1.60E-07              | 1.40E-01       | 2.20E-01 | 2.90E-01   |
| Glycan structures - biosynthesis 1 | ALG8    | rs567697   | omental adipose      | 2.80E-08              | 1.40E-01       | 2.20E-01 | 2.90E-01   |
| Glycan structures - biosynthesis 1 | ALG8    | rs567697   | subcutaneous adipose | 2.70E-05              | 1.40E-01       | 2.20E-01 | 2.90E-01   |
| Glycan structures - biosynthesis 1 | B3GAT1  | rs10894863 | liver                | 1.20E-12              | NA             | 5.20E-03 | NA         |
| Glycan structures - biosynthesis 1 | B4GALT1 | rs10971438 | subcutaneous adipose | 5.30E-05              | 5.90E-01       | 1.40E-01 | 6.58E-01   |
| Glycan structures - biosynthesis 1 | B4GALT3 | rs11576830 | subcutaneous adipose | 3.50E-05              | 3.50E-01       | 3.70E-01 | 5.66E-01   |
| Glycan structures - biosynthesis 1 | B4GALT4 | rs3936077  | subcutaneous adipose | 1.20E-05              | 4.30E-01       | 2.00E-01 | 9.51E-01   |
| Glycan structures - biosynthesis 1 | B4GALT5 | rs1056198  | subcutaneous adipose | 0.00011               | 0.52           | 0.44     | 0.7875104  |
| Glycan structures - biosynthesis 1 | B4GALT5 | rs4810997  | subcutaneous adipose | 8.70E-05              | 6.70E-01       | 4.40E-01 | 9.75E-01   |

| Pathway                            | Gene    | eSNP       | Tissue               | SNP-Expression Pvalue | SNP-T2D Pvalue |          |            |
|------------------------------------|---------|------------|----------------------|-----------------------|----------------|----------|------------|
|                                    |         |            |                      |                       | DIAGRAM        | WTCCC    | Non-WTCCC  |
| Glycan structures - biosynthesis 1 | C1GALT1 | rs10487592 | liver                | 2.60E-06              | 9.00E-01       | 1.00E-02 | 5.71E-02   |
| Glycan structures - biosynthesis 1 | C1GALT1 | rs10487592 | omental adipose      | 5.40E-12              | 9.00E-01       | 1.00E-02 | 5.71E-02   |
| Glycan structures - biosynthesis 1 | C1GALT1 | rs10487592 | subcutaneous adipose | 5.10E-13              | 9.00E-01       | 1.00E-02 | 5.71E-02   |
| Glycan structures - biosynthesis 1 | CHST1   | rs1348965  | omental adipose      | 5.20E-07              | 6.00E-02       | 2.70E-02 | 4.09E-01   |
| Glycan structures - biosynthesis 1 | CHST11  | rs2463019  | omental adipose      | 5.00E-05              | 2.70E-01       | 4.70E-01 | 3.44E-01   |
| Glycan structures - biosynthesis 1 | CHST12  | rs1548597  | liver                | 2.60E-05              | NA             | 1.50E-01 | NA         |
| Glycan structures - biosynthesis 1 | CHST12  | rs1548597  | omental adipose      | 5.10E-05              | NA             | 1.50E-01 | NA         |
| Glycan structures - biosynthesis 1 | CHST13  | rs17742502 | omental adipose      | 3.20E-12              | 3.70E-01       | 4.00E-02 | 6.80E-01   |
| Glycan structures - biosynthesis 1 | CHST13  | rs17742502 | subcutaneous adipose | 1.20E-10              | 3.70E-01       | 4.00E-02 | 6.80E-01   |
| Glycan structures - biosynthesis 1 | CHST3   | rs10823878 | liver                | 0                     | 0.95           | 0.13     | 0.25681937 |
| Glycan structures - biosynthesis 1 | CHST4   | rs904763   | omental adipose      | 4.80E-06              | 1.40E-01       | 1.20E-01 | 4.28E-01   |
| Glycan structures - biosynthesis 1 | CHST6   | rs12928076 | liver                | 6.40E-06              | 2.80E-01       | 6.80E-01 | 2.44E-01   |
| Glycan structures - biosynthesis 1 | DAD1    | rs3811189  | subcutaneous adipose | 0.00011               | 0.45           | 0.094    | 0.76208262 |
| Glycan structures - biosynthesis 1 | DDOST   | rs3738133  | subcutaneous adipose | 6.10E-05              | 3.10E-01       | 6.60E-01 | 2.92E-01   |
| Glycan structures - biosynthesis 1 | DPAGT1  | rs639373   | liver                | 2.80E-06              | 1.30E-01       | 7.00E-01 | 7.36E-02   |
| Glycan structures - biosynthesis 1 | EXT1    | rs11562664 | subcutaneous adipose | 4.00E-05              | 4.80E-01       | 4.60E-02 | 5.29E-01   |
| Glycan structures - biosynthesis 1 | EXT2    | rs11037858 | omental adipose      | 3.60E-06              | 6.00E-02       | 1.50E-02 | 5.18E-01   |
| Glycan structures - biosynthesis 1 | EXT2    | rs11037858 | subcutaneous adipose | 6.90E-06              | 6.00E-02       | 1.50E-02 | 5.18E-01   |
| Glycan structures - biosynthesis 1 | EXTL1   | rs12074420 | omental adipose      | 9.10E-05              | 3.90E-01       | 3.50E-01 | 6.61E-01   |



| Pathway                            | Gene    | eSNP       | Tissue               | SNP-Expression Pvalue | SNP-T2D Pvalue |          |            |
|------------------------------------|---------|------------|----------------------|-----------------------|----------------|----------|------------|
|                                    |         |            |                      |                       | DIAGRAM        | WTCCC    | Non-WTCCC  |
| Glycan structures - biosynthesis 1 | EXTL2   | rs3737580  | omental adipose      | 3.30E-06              | 9.90E-01       | 5.20E-01 | 6.16E-01   |
| Glycan structures - biosynthesis 1 | EXTL2   | rs3737580  | subcutaneous adipose | 9.40E-08              | 9.90E-01       | 5.20E-01 | 6.16E-01   |
| Glycan structures - biosynthesis 1 | FUT8    | rs10132229 | omental adipose      | 3.80E-05              | 6.60E-01       | 1.30E-01 | 5.41E-01   |
| Glycan structures - biosynthesis 1 | GALNT10 | rs6873488  | omental adipose      | 8.40E-07              | 2.30E-02       | 2.10E-03 | 5.01E-01   |
| Glycan structures - biosynthesis 1 | GALNT10 | rs6873488  | subcutaneous adipose | 1.70E-07              | 2.30E-02       | 2.10E-03 | 5.01E-01   |
| Glycan structures - biosynthesis 1 | GALNT11 | rs1029949  | liver                | 0                     | 0.51           | 0.9      | 0.41658258 |
| Glycan structures - biosynthesis 1 | GALNT13 | rs12693824 | subcutaneous adipose | 2.70E-05              | 4.50E-01       | 7.10E-03 | 2.61E-01   |
| Glycan structures - biosynthesis 1 | GALNT13 | rs7558722  | subcutaneous adipose | 2.20E-05              | 4.70E-01       | 7.10E-03 | 2.42E-01   |
| Glycan structures - biosynthesis 1 | GALNT14 | rs12990027 | liver                | 9.90E-06              | 6.20E-01       | 2.70E-01 | 8.40E-01   |
| Glycan structures - biosynthesis 1 | GALNT14 | rs12991678 | liver                | 7.20E-06              | 8.00E-01       | 2.70E-01 | 5.90E-01   |
| Glycan structures - biosynthesis 1 | GALNT14 | rs4952023  | liver                | 8.10E-06              | 6.30E-01       | 2.70E-01 | 8.25E-01   |
| Glycan structures - biosynthesis 1 | GALNT2  | rs6687864  | omental adipose      | 1.00E-04              | 8.00E-01       | 2.60E-01 | 5.78E-01   |
| Glycan structures - biosynthesis 1 | GALNT4  | rs17782889 | subcutaneous adipose | 2.50E-05              | 4.80E-02       | 4.20E-02 | 2.70E-01   |
| Glycan structures - biosynthesis 1 | GALNT6  | rs10876162 | omental adipose      | 1.50E-05              | 6.50E-01       | 4.60E-01 | 9.73E-01   |
| Glycan structures - biosynthesis 1 | GALNT8  | rs17776335 | subcutaneous adipose | 4.40E-05              | 6.10E-01       | 4.90E-01 | 8.80E-01   |
| Glycan structures - biosynthesis 1 | GALNT9  | rs12319239 | liver                | 4.90E-05              | 6.10E-01       | 5.30E-01 | 8.41E-01   |
| Glycan structures - biosynthesis 1 | GALNTL1 | rs11158808 | omental adipose      | 1.40E-05              | 6.20E-01       | 3.50E-01 | 9.47E-01   |
| Glycan structures - biosynthesis 1 | GALNTL2 | rs6766571  | liver                | 8.70E-11              | 1.20E-02       | 1.10E-02 | 1.52E-01   |
| Glycan structures - biosynthesis 1 | GALNTL4 | rs10765880 | subcutaneous adipose | 2.20E-05              | 3.30E-01       | 3.00E-03 | 2.97E-01   |

| Pathway                            | Gene     | eSNP       | Tissue               | SNP-Expression Pvalue | SNP-T2D Pvalue |          |            |
|------------------------------------|----------|------------|----------------------|-----------------------|----------------|----------|------------|
|                                    |          |            |                      |                       | DIAGRAM        | WTCCC    | Non-WTCCC  |
| Glycan structures - biosynthesis 1 | GCNT1    | rs890152   | subcutaneous adipose | 3.70E-05              | 5.90E-01       | 7.40E-01 | 6.31E-01   |
| Glycan structures - biosynthesis 1 | GCNT3    | rs6494102  | liver                | 2.60E-05              | 3.20E-01       | 6.00E-01 | 3.39E-01   |
| Glycan structures - biosynthesis 1 | HS3ST1   | rs923997   | subcutaneous adipose | 5.30E-09              | 8.80E-01       | 1.30E-01 | 3.12E-01   |
| Glycan structures - biosynthesis 1 | HS3ST3A1 | rs11869775 | omental adipose      | 8.00E-06              | 3.00E-03       | 1.60E-03 | 1.16E-01   |
| Glycan structures - biosynthesis 1 | HS3ST3B1 | rs17669311 | liver                | 9.90E-09              | 3.00E-02       | 4.90E-02 | 1.55E-01   |
| Glycan structures - biosynthesis 1 | HS6ST1   | rs3732209  | liver                | 0                     | 0.85           | 0.25     | 0.5058482  |
| Glycan structures - biosynthesis 1 | MAN1A1   | rs924397   | liver                | 5.40E-07              | 3.00E-01       | 5.10E-02 | 8.92E-01   |
| Glycan structures - biosynthesis 1 | MAN1A2   | rs2767322  | subcutaneous adipose | 2.70E-06              | 8.40E-02       | 4.90E-03 | 8.98E-01   |
| Glycan structures - biosynthesis 1 | MAN1B1   | rs4880201  | liver                | 7.10E-07              | NA             | 8.20E-02 | NA         |
| Glycan structures - biosynthesis 1 | MAN1B1   | rs4880201  | omental adipose      | 1.30E-05              | NA             | 8.20E-02 | NA         |
| Glycan structures - biosynthesis 1 | MAN1B1   | rs4880201  | subcutaneous adipose | 1.60E-05              | NA             | 8.20E-02 | NA         |
| Glycan structures - biosynthesis 1 | MAN1C1   | rs760599   | liver                | 3.20E-10              | 9.50E-04       | 2.00E-01 | 3.85E-04   |
| Glycan structures - biosynthesis 1 | MAN1C1   | rs760599   | liver                | 0                     | 0.00095        | 0.2      | 0.00038527 |
| Glycan structures - biosynthesis 1 | MAN2A1   | rs11744065 | subcutaneous adipose | 5.70E-05              | 2.40E-01       | 6.90E-03 | 5.83E-01   |
| Glycan structures - biosynthesis 1 | MGAT2    | rs4900927  | liver                | 1.00E-04              | 1.50E-01       | 8.50E-03 | 9.00E-01   |
| Glycan structures - biosynthesis 1 | MGAT2    | rs4900928  | liver                | 9.50E-05              | 1.80E-01       | 8.50E-03 | 7.93E-01   |
| Glycan structures - biosynthesis 1 | MGAT3    | rs5757373  | omental adipose      | 3.80E-05              | 2.90E-01       | 3.80E-01 | 4.48E-01   |
| Glycan structures - biosynthesis 1 | MGAT4A   | rs2276645  | subcutaneous adipose | 9.50E-05              | 9.70E-01       | 1.70E-01 | 2.92E-01   |
| Glycan structures - biosynthesis 1 | MGAT5    | rs3748900  | subcutaneous adipose | 4.90E-05              | 3.50E-01       | 2.00E-01 | 7.93E-01   |

| Pathway                                               | Gene    | eSNP       | Tissue               | SNP-Expression Pvalue | SNP-T2D Pvalue |          |           |
|-------------------------------------------------------|---------|------------|----------------------|-----------------------|----------------|----------|-----------|
|                                                       |         |            |                      |                       | DIAGRAM        | WTCCC    | Non-WTCCC |
| Glycan structures - biosynthesis 1                    | NDST1   | rs4428396  | subcutaneous adipose | 9.80E-06              | 6.10E-01       | 1.90E-01 | 7.27E-01  |
| Glycan structures - biosynthesis 1                    | NDST2   | rs2292307  | omental adipose      | 1.50E-05              | 5.90E-01       | 6.10E-01 | 7.37E-01  |
| Glycan structures - biosynthesis 1                    | NDST2   | rs4082339  | omental adipose      | 1.50E-05              | 5.70E-01       | 6.10E-01 | 7.07E-01  |
| Glycan structures - biosynthesis 1                    | POMGNT1 | rs12410307 | liver                | 6.00E-06              | 3.40E-01       | 7.30E-01 | 2.96E-01  |
| Glycan structures - biosynthesis 1                    | POMT2   | rs17105732 | subcutaneous adipose | 0.00011               | 0.49           | 0.3      | 0.9032131 |
| Glycan structures - biosynthesis 1                    | RPN1    | rs7429360  | omental adipose      | 4.40E-05              | 2.10E-01       | 2.30E-01 | 4.41E-01  |
| Glycan structures - biosynthesis 1                    | RPN1    | rs7429360  | subcutaneous adipose | 2.40E-05              | 2.10E-01       | 2.30E-01 | 4.41E-01  |
| Glycan structures - biosynthesis 1                    | ST3GAL1 | rs12678229 | liver                | 7.00E-05              | 4.30E-01       | 4.50E-03 | 2.32E-01  |
| Glycan structures - biosynthesis 1                    | ST3GAL3 | rs2782641  | subcutaneous adipose | 1.00E-04              | 3.30E-02       | 1.00E-03 | 7.62E-01  |
| Glycan structures - biosynthesis 1                    | ST3GAL4 | rs11220477 | liver                | 1.00E-04              | 9.70E-01       | 7.30E-02 | 1.63E-01  |
| Glycan structures - biosynthesis 1                    | STT3B   | rs3792551  | omental adipose      | 1.50E-13              | NA             | 1.70E-02 | NA        |
| Glycan structures - biosynthesis 1                    | STT3B   | rs3792551  | subcutaneous adipose | 2.70E-06              | NA             | 1.70E-02 | NA        |
| Glycan structures - biosynthesis 1                    | WBSCR17 | rs2079406  | subcutaneous adipose | 2.30E-05              | 8.40E-01       | 1.50E-01 | 3.78E-01  |
| Glycan structures - biosynthesis 1                    | XYLT2   | rs16949053 | liver                | 3.80E-05              | NA             | 3.00E-02 | NA        |
| Glycosylphosphatidylinositol(GPI)-anchor biosynthesis | CDC91L1 | rs6120400  | omental adipose      | 6.50E-05              | 4.90E-01       | 8.90E-01 | 3.98E-01  |
| Glycosylphosphatidylinositol(GPI)-anchor biosynthesis | DPM2    | rs7874186  | liver                | 7.80E-08              | 2.10E-01       | 3.20E-03 | 5.23E-01  |
| Glycosylphosphatidylinositol(GPI)-anchor biosynthesis | DPM2    | rs7874186  | omental adipose      | 3.00E-10              | 2.10E-01       | 3.20E-03 | 5.23E-01  |

| Pathway                                               | Gene  | eSNP       | Tissue               | SNP-Expression Pvalue | SNP-T2D Pvalue |          |           |
|-------------------------------------------------------|-------|------------|----------------------|-----------------------|----------------|----------|-----------|
|                                                       |       |            |                      |                       | DIAGRAM        | WTCCC    | Non-WTCCC |
| Glycosylphosphatidylinositol(GPI)-anchor biosynthesis | DPM2  | rs7874186  | subcutaneous adipose | 7.00E-07              | 2.10E-01       | 3.20E-03 | 5.23E-01  |
| Glycosylphosphatidylinositol(GPI)-anchor biosynthesis | GPAA1 | rs11780874 | liver                | 5.30E-06              | 4.90E-01       | 6.60E-03 | 2.18E-01  |
| Glycosylphosphatidylinositol(GPI)-anchor biosynthesis | GPAA1 | rs7822232  | liver                | 7.20E-06              | NA             | 6.60E-03 | NA        |
| Glycosylphosphatidylinositol(GPI)-anchor biosynthesis | GPLD1 | rs3761789  | subcutaneous adipose | 9.10E-05              | 2.60E-01       | 1.70E-01 | 6.49E-01  |
| Glycosylphosphatidylinositol(GPI)-anchor biosynthesis | PIGB  | rs8040756  | omental adipose      | 9.70E-07              | 3.20E-01       | 2.80E-03 | 3.03E-01  |
| Glycosylphosphatidylinositol(GPI)-anchor biosynthesis | PIGC  | rs6702667  | liver                | 9.50E-08              | 5.80E-01       | 5.70E-01 | 7.57E-01  |
| Glycosylphosphatidylinositol(GPI)-anchor biosynthesis | PIGF  | rs2012022  | omental adipose      | 1.60E-05              | 8.30E-02       | 8.60E-02 | 3.08E-01  |
| Glycosylphosphatidylinositol(GPI)-anchor biosynthesis | PIGH  | rs2038490  | omental adipose      | 6.70E-05              | 4.20E-02       | 2.80E-04 | 9.13E-01  |
| Glycosylphosphatidylinositol(GPI)-anchor biosynthesis | PIGK  | rs12403340 | liver                | 2.40E-06              | 2.70E-01       | 4.80E-01 | 3.37E-01  |
| Glycosylphosphatidylinositol(GPI)-anchor biosynthesis | PIGK  | rs12403340 | omental adipose      | 8.60E-06              | 2.70E-01       | 4.80E-01 | 3.37E-01  |
| Glycosylphosphatidylinositol(GPI)-anchor biosynthesis | PIGK  | rs12403340 | subcutaneous adipose | 6.10E-05              | 2.70E-01       | 4.80E-01 | 3.37E-01  |
| Glycosylphosphatidylinositol(GPI)-anchor biosynthesis | PIGM  | rs1934078  | subcutaneous adipose | 4.30E-05              | 8.30E-01       | 4.20E-01 | 7.24E-01  |
| Glycosylphosphatidylinositol(GPI)-anchor biosynthesis | PIGN  | rs8097062  | omental adipose      | 7.10E-05              | 7.10E-01       | 3.00E-02 | 2.17E-01  |

| Pathway                                               | Gene | eSNP       | Tissue               | SNP-Expression Pvalue | SNP-T2D Pvalue |          |           |
|-------------------------------------------------------|------|------------|----------------------|-----------------------|----------------|----------|-----------|
|                                                       |      |            |                      |                       | DIAGRAM        | WTCCC    | Non-WTCCC |
| Glycosylphosphatidylinositol(GPI)-anchor biosynthesis | PIGO | rs1566595  | omental adipose      | 7.50E-05              | 1.90E-02       | 6.10E-02 | 8.15E-02  |
| Glycosylphosphatidylinositol(GPI)-anchor biosynthesis | PIGO | rs1566595  | subcutaneous adipose | 1.30E-05              | 1.90E-02       | 6.10E-02 | 8.15E-02  |
| Glycosylphosphatidylinositol(GPI)-anchor biosynthesis | PIGP | rs2835685  | omental adipose      | 2.40E-12              | 9.30E-02       | 1.70E-02 | 6.85E-01  |
| Glycosylphosphatidylinositol(GPI)-anchor biosynthesis | PIGP | rs2835685  | subcutaneous adipose | 1.10E-06              | 9.30E-02       | 1.70E-02 | 6.85E-01  |
| Glycosylphosphatidylinositol(GPI)-anchor biosynthesis | PIGQ | rs2017567  | omental adipose      | 3.90E-08              | 4.70E-01       | 8.60E-02 | 7.02E-01  |
| Glycosylphosphatidylinositol(GPI)-anchor biosynthesis | PIGQ | rs4144003  | omental adipose      | 1.60E-07              | 5.20E-01       | 8.60E-02 | 6.23E-01  |
| Glycosylphosphatidylinositol(GPI)-anchor biosynthesis | PIGQ | rs4984898  | omental adipose      | 2.60E-07              | 5.20E-01       | 8.60E-02 | 6.23E-01  |
| Glycosylphosphatidylinositol(GPI)-anchor biosynthesis | PIGQ | rs710925   | omental adipose      | 5.70E-08              | 5.00E-01       | 8.60E-02 | 6.53E-01  |
| Glycosylphosphatidylinositol(GPI)-anchor biosynthesis | PIGT | rs2743439  | omental adipose      | 3.30E-09              | 3.20E-01       | 5.20E-02 | 8.51E-01  |
| Glycosylphosphatidylinositol(GPI)-anchor biosynthesis | PIGT | rs2743439  | subcutaneous adipose | 5.40E-06              | 3.20E-01       | 5.20E-02 | 8.51E-01  |
| Glycosylphosphatidylinositol(GPI)-anchor biosynthesis | PIGV | rs11807824 | omental adipose      | 2.20E-05              | 2.00E-01       | 2.20E-01 | 4.31E-01  |
| Glycosylphosphatidylinositol(GPI)-anchor biosynthesis | PIGX | rs10446497 | omental adipose      | 3.10E-07              | 8.20E-01       | 2.80E-01 | 5.79E-01  |
| Glycosylphosphatidylinositol(GPI)-anchor biosynthesis | PIGX | rs10446497 | subcutaneous adipose | 1.10E-06              | 8.20E-01       | 2.80E-01 | 5.79E-01  |

| Pathway                    | Gene  | eSNP       | Tissue               | SNP-Expression Pvalue | SNP-T2D Pvalue |          |            |
|----------------------------|-------|------------|----------------------|-----------------------|----------------|----------|------------|
|                            |       |            |                      |                       | DIAGRAM        | WTCCC    | Non-WTCCC  |
| Hematopoietic cell lineage | ANPEP | rs4932145  | omental adipose      | 1.10E-06              | 6.90E-02       | 1.40E-02 | 5.89E-01   |
| Hematopoietic cell lineage | CD14  | rs7721577  | liver                | 2.80E-05              | 3.20E-01       | 6.40E-02 | 9.09E-01   |
| Hematopoietic cell lineage | CD1A  | rs12756570 | omental adipose      | 3.70E-06              | 9.80E-02       | 1.20E-01 | 2.98E-01   |
| Hematopoietic cell lineage | CD1A  | rs12756570 | subcutaneous adipose | 1.20E-05              | 9.80E-02       | 1.20E-01 | 2.98E-01   |
| Hematopoietic cell lineage | CD1E  | rs16840121 | subcutaneous adipose | 8.30E-05              | 9.00E-01       | 2.40E-01 | 4.39E-01   |
| Hematopoietic cell lineage | CD22  | rs7251526  | liver                | 3.70E-08              | 3.30E-01       | 1.90E-01 | 7.69E-01   |
| Hematopoietic cell lineage | CD22  | rs7251526  | omental adipose      | 1.00E-11              | 3.30E-01       | 1.90E-01 | 7.69E-01   |
| Hematopoietic cell lineage | CD33  | rs273634   | liver                | 1.40E-06              | 6.60E-01       | 5.90E-01 | 8.61E-01   |
| Hematopoietic cell lineage | CD33  | rs273634   | subcutaneous adipose | 2.00E-05              | 6.60E-01       | 5.90E-01 | 8.61E-01   |
| Hematopoietic cell lineage | CD33  | rs273639   | liver                | 5.10E-07              | 6.60E-01       | 5.90E-01 | 8.61E-01   |
| Hematopoietic cell lineage | CD33  | rs273639   | subcutaneous adipose | 1.70E-05              | 6.60E-01       | 5.90E-01 | 8.61E-01   |
| Hematopoietic cell lineage | CD36  | rs1722505  | omental adipose      | 9.50E-14              | 5.20E-02       | 1.20E-02 | 5.03E-01   |
| Hematopoietic cell lineage | CD36  | rs1722505  | subcutaneous adipose | 5.10E-14              | 5.20E-02       | 1.20E-02 | 5.03E-01   |
| Hematopoietic cell lineage | CD37  | rs2288478  | subcutaneous adipose | 2.40E-05              | 8.30E-02       | 5.80E-02 | 3.81E-01   |
| Hematopoietic cell lineage | CD38  | rs997250   | omental adipose      | 8.00E-10              | 3.80E-01       | 6.60E-03 | 3.31E-01   |
| Hematopoietic cell lineage | CD3D  | rs529717   | subcutaneous adipose | 0.00012               | 0.57           | 0.13     | 0.66493012 |
| Hematopoietic cell lineage | CD4   | rs1055141  | liver                | 1.40E-06              | 1.90E-01       | 5.50E-02 | 7.87E-01   |
| Hematopoietic cell lineage | CD44  | rs13347    | omental adipose      | 1.40E-07              | 2.10E-01       | 3.60E-02 | 9.62E-01   |
| Hematopoietic cell lineage | CD44  | rs13347    | subcutaneous adipose | 9.50E-07              | 2.10E-01       | 3.60E-02 | 9.62E-01   |

| Pathway                    | Gene     | eSNP       | Tissue               | SNP-Expression Pvalue | SNP-T2D Pvalue |          |            |
|----------------------------|----------|------------|----------------------|-----------------------|----------------|----------|------------|
|                            |          |            |                      |                       | DIAGRAM        | WTCCC    | Non-WTCCC  |
| Hematopoietic cell lineage | CD55     | rs6672985  | liver                | 3.40E-06              | 3.10E-01       | 1.50E-01 | 8.05E-01   |
| Hematopoietic cell lineage | CD59     | rs704700   | liver                | 2.80E-08              | 4.60E-02       | 1.40E-02 | 4.32E-01   |
| Hematopoietic cell lineage | CD59     | rs704700   | omental adipose      | 8.00E-08              | 4.60E-02       | 1.40E-02 | 4.32E-01   |
| Hematopoietic cell lineage | CD59     | rs704700   | subcutaneous adipose | 7.00E-06              | 4.60E-02       | 1.40E-02 | 4.32E-01   |
| Hematopoietic cell lineage | CD8B     | rs6547705  | omental adipose      | 0.00013               | 0.2            | 0.087    | 0.69117694 |
| Hematopoietic cell lineage | CD9      | rs10849399 | liver                | 6.00E-05              | 8.50E-01       | 2.20E-02 | 1.13E-01   |
| Hematopoietic cell lineage | CD9      | rs10849401 | liver                | 8.60E-06              | 8.40E-01       | 2.20E-02 | 1.17E-01   |
| Hematopoietic cell lineage | CR1      | rs1323720  | liver                | 1.10E-09              | 6.30E-03       | 6.30E-03 | 1.13E-01   |
| Hematopoietic cell lineage | CR1      | rs1323720  | omental adipose      | 1.40E-06              | 6.30E-03       | 6.30E-03 | 1.13E-01   |
| Hematopoietic cell lineage | CR1      | rs1323720  | subcutaneous adipose | 7.50E-10              | 6.30E-03       | 6.30E-03 | 1.13E-01   |
| Hematopoietic cell lineage | CSF3R    | rs3917987  | omental adipose      | 0.00012               | NA             | 0.19     | NA         |
| Hematopoietic cell lineage | FCER2    | rs1990975  | omental adipose      | 1.50E-19              | NA             | 6.70E-01 | NA         |
| Hematopoietic cell lineage | FCER2    | rs1990975  | subcutaneous adipose | 2.30E-11              | NA             | 6.70E-01 | NA         |
| Hematopoietic cell lineage | FLT3LG   | rs6509443  | liver                | 3.20E-05              | NA             | 9.80E-01 | NA         |
| Hematopoietic cell lineage | GP1BB    | rs9605002  | omental adipose      | 6.70E-05              | NA             | 3.50E-01 | NA         |
| Hematopoietic cell lineage | HLA-DRA  | rs2858331  | liver                | 1.90E-07              | 9.00E-02       | 2.70E-03 | 9.46E-01   |
| Hematopoietic cell lineage | HLA-DRB1 | rs1077394  | liver                | 1.50E-05              | 2.10E-05       | 5.50E-04 | 1.85E-03   |
| Hematopoietic cell lineage | HLA-DRB1 | rs1077394  | omental adipose      | 2.90E-11              | 2.10E-05       | 5.50E-04 | 1.85E-03   |
| Hematopoietic cell lineage | HLA-DRB1 | rs1077394  | subcutaneous adipose | 2.20E-09              | 2.10E-05       | 5.50E-04 | 1.85E-03   |

| Pathway                                 | Gene     | eSNP       | Tissue               | SNP-Expression Pvalue | SNP-T2D Pvalue |          |           |
|-----------------------------------------|----------|------------|----------------------|-----------------------|----------------|----------|-----------|
|                                         |          |            |                      |                       | DIAGRAM        | WTCCC    | Non-WTCCC |
| Hematopoietic cell lineage              | HLA-DRB5 | rs1077394  | omental adipose      | 1.40E-05              | 2.10E-05       | 5.50E-04 | 1.85E-03  |
| Hematopoietic cell lineage              | HLA-DRB5 | rs1077394  | subcutaneous adipose | 2.20E-05              | 2.10E-05       | 5.50E-04 | 1.85E-03  |
| Hematopoietic cell lineage              | IL11RA   | rs11575584 | omental adipose      | 9.70E-05              | 1.60E-01       | 3.40E-01 | 2.38E-01  |
| Hematopoietic cell lineage              | IL11RA   | rs11575584 | subcutaneous adipose | 4.10E-06              | 1.60E-01       | 3.40E-01 | 2.38E-01  |
| Hematopoietic cell lineage              | IL1R2    | rs12467316 | liver                | 3.60E-15              | 7.40E-01       | 2.10E-01 | 5.82E-01  |
| Hematopoietic cell lineage              | IL2RA    | rs10905879 | omental adipose      | 4.20E-11              | 1.60E-01       | 7.30E-03 | 8.30E-01  |
| Hematopoietic cell lineage              | IL4      | rs7729507  | liver                | 4.30E-05              | 3.10E-01       | 6.10E-01 | 3.19E-01  |
| Hematopoietic cell lineage              | IL4R     | rs16976728 | liver                | 4.10E-07              | 5.60E-01       | 1.50E-01 | 7.24E-01  |
| Hematopoietic cell lineage              | IL7R     | rs6892686  | liver                | 1.30E-05              | 9.90E-01       | 3.70E-01 | 4.81E-01  |
| Hematopoietic cell lineage              | ITGA1    | rs9292020  | subcutaneous adipose | 9.90E-05              | 8.40E-01       | 9.70E-02 | 2.90E-01  |
| Hematopoietic cell lineage              | ITGA2    | rs13155884 | omental adipose      | 4.40E-07              | NA             | 4.90E-03 | NA        |
| Hematopoietic cell lineage              | ITGA2    | rs13155884 | subcutaneous adipose | 6.40E-06              | NA             | 4.90E-03 | NA        |
| Hematopoietic cell lineage              | ITGA2B   | rs11652522 | subcutaneous adipose | 2.10E-05              | 7.70E-01       | 3.10E-01 | 6.79E-01  |
| Hematopoietic cell lineage              | ITGA6    | rs1882165  | liver                | 1.00E-04              | 6.20E-01       | 4.40E-01 | 9.48E-01  |
| Hematopoietic cell lineage              | ITGAM    | rs8056505  | subcutaneous adipose | 3.20E-05              | 1.80E-01       | 1.90E-01 | 4.22E-01  |
| Hematopoietic cell lineage              | KITLG    | rs4842610  | liver                | 7.50E-05              | 1.50E-01       | 5.40E-02 | 6.58E-01  |
| Hematopoietic cell lineage              | TFRC     | rs9843585  | liver                | 5.80E-05              | NA             | 2.80E-01 | NA        |
| Hematopoietic cell lineage              | TPO      | rs4927594  | omental adipose      | 4.00E-06              | 8.80E-01       | 1.40E-01 | 3.27E-01  |
| Neuroactive ligand-receptor interaction | ADORA1   | rs1874142  | omental adipose      | 7.90E-08              | 3.40E-01       | 4.40E-01 | 4.84E-01  |



| Pathway                                 | Gene    | eSNP       | Tissue               | SNP-Expression Pvalue | SNP-T2D Pvalue |          |           |
|-----------------------------------------|---------|------------|----------------------|-----------------------|----------------|----------|-----------|
|                                         |         |            |                      |                       | DIAGRAM        | WTCCC    | Non-WTCCC |
| Neuroactive ligand-receptor interaction | ADORA1  | rs1874142  | subcutaneous adipose | 1.80E-05              | 3.40E-01       | 4.40E-01 | 4.84E-01  |
| Neuroactive ligand-receptor interaction | ADORA2A | rs3788372  | liver                | 2.90E-07              | 2.60E-01       | 1.10E-01 | 7.85E-01  |
| Neuroactive ligand-receptor interaction | ADORA2A | rs3788372  | omental adipose      | 2.20E-05              | 2.60E-01       | 1.10E-01 | 7.85E-01  |
| Neuroactive ligand-receptor interaction | ADORA2B | rs3112521  | liver                | 2.70E-06              | 3.40E-01       | 3.00E-01 | 6.26E-01  |
| Neuroactive ligand-receptor interaction | ADORA3  | rs3767602  | omental adipose      | 8.40E-15              | 6.70E-01       | 8.60E-02 | 4.28E-01  |
| Neuroactive ligand-receptor interaction | ADORA3  | rs3767602  | subcutaneous adipose | 1.60E-11              | 6.70E-01       | 8.60E-02 | 4.28E-01  |
| Neuroactive ligand-receptor interaction | ADRA1A  | rs6992095  | subcutaneous adipose | 6.20E-05              | 1.50E-01       | 3.40E-02 | 7.74E-01  |
| Neuroactive ligand-receptor interaction | ADRA1B  | rs938541   | subcutaneous adipose | 6.30E-05              | 9.70E-01       | 3.30E-01 | 4.63E-01  |
| Neuroactive ligand-receptor interaction | ADRA2A  | rs945332   | omental adipose      | 3.80E-05              | 1.20E-01       | 1.10E-02 | 9.16E-01  |
| Neuroactive ligand-receptor interaction | ADRA2B  | rs7562544  | omental adipose      | 1.30E-11              | 2.80E-01       | 4.60E-02 | 9.12E-01  |
| Neuroactive ligand-receptor interaction | ADRA2C  | rs2857960  | liver                | 2.90E-08              | NA             | 5.90E-01 | NA        |
| Neuroactive ligand-receptor interaction | ADRB1   | rs2782979  | liver                | 1.40E-08              | 1.20E-01       | 3.60E-04 | 4.71E-01  |
| Neuroactive ligand-receptor interaction | ADRB2   | rs973057   | omental adipose      | 5.90E-07              | 1.80E-01       | 7.50E-02 | 6.72E-01  |
| Neuroactive ligand-receptor interaction | AGTR1   | rs16861027 | liver                | 7.30E-05              | 8.30E-03       | 3.30E-02 | 5.22E-02  |
| Neuroactive ligand-receptor interaction | BDKRB2  | rs4349080  | subcutaneous adipose | 2.20E-05              | 1.40E-01       | 2.10E-01 | 3.00E-01  |
| Neuroactive ligand-receptor interaction | CALCRL  | rs17751491 | subcutaneous adipose | 6.00E-05              | 3.50E-01       | 1.90E-01 | 8.11E-01  |
| Neuroactive ligand-receptor interaction | CCKBR   | rs1876826  | omental adipose      | 5.80E-07              | 3.30E-01       | 4.10E-02 | 7.67E-01  |

| Pathway                                 | Gene  | eSNP       | Tissue               | SNP-Expression Pvalue | SNP-T2D Pvalue |          |            |
|-----------------------------------------|-------|------------|----------------------|-----------------------|----------------|----------|------------|
|                                         |       |            |                      |                       | DIAGRAM        | WTCCC    | Non-WTCCC  |
| Neuroactive ligand-receptor interaction | CHRM1 | rs530752   | omental adipose      | 6.40E-05              | 5.30E-02       | 3.70E-01 | 4.99E-02   |
| Neuroactive ligand-receptor interaction | CHRM3 | rs10495433 | liver                | 6.20E-05              | 4.50E-02       | 6.00E-02 | 2.06E-01   |
| Neuroactive ligand-receptor interaction | CHRM3 | rs10495434 | liver                | 1.00E-05              | 5.20E-02       | 6.00E-02 | 2.39E-01   |
| Neuroactive ligand-receptor interaction | CNR1  | rs13197090 | liver                | 0                     | 0.39           | 0.32     | 0.69635037 |
| Neuroactive ligand-receptor interaction | CTSG  | rs4982958  | subcutaneous adipose | 9.00E-05              | 4.00E-01       | 3.00E-01 | 7.40E-01   |
| Neuroactive ligand-receptor interaction | DRD1  | rs11949641 | subcutaneous adipose | 9.70E-05              | 9.20E-01       | 1.70E-01 | 3.33E-01   |
| Neuroactive ligand-receptor interaction | DRD2  | rs10736469 | subcutaneous adipose | 5.30E-09              | 3.90E-01       | 1.70E-01 | 9.32E-01   |
| Neuroactive ligand-receptor interaction | DRD4  | rs12421158 | omental adipose      | 7.80E-05              | 9.40E-01       | 1.80E-01 | 3.29E-01   |
| Neuroactive ligand-receptor interaction | EDG2  | rs544276   | subcutaneous adipose | 2.20E-06              | 7.10E-01       | 9.90E-02 | 4.15E-01   |
| Neuroactive ligand-receptor interaction | EDG3  | rs9314668  | subcutaneous adipose | 1.60E-06              | 6.80E-01       | 9.40E-01 | 6.09E-01   |
| Neuroactive ligand-receptor interaction | EDG7  | rs9729018  | liver                | 2.70E-06              | 4.00E-01       | 6.30E-02 | 7.40E-01   |
| Neuroactive ligand-receptor interaction | EDNRA | rs2163011  | liver                | 6.40E-05              | 8.70E-02       | 6.90E-01 | 4.02E-02   |
| Neuroactive ligand-receptor interaction | EDNRB | rs6563019  | subcutaneous adipose | 2.60E-06              | 4.40E-01       | 1.80E-02 | 4.03E-01   |
| Neuroactive ligand-receptor interaction | F2    | rs2291443  | liver                | 9.50E-06              | 5.30E-01       | 4.20E-01 | 8.25E-01   |
| Neuroactive ligand-receptor interaction | F2R   | rs250760   | omental adipose      | 4.80E-05              | 3.50E-02       | 2.20E-01 | 5.30E-02   |
| Neuroactive ligand-receptor interaction | F2RL1 | rs353964   | subcutaneous adipose | 0.00011               | 0.046          | 0.053    | 0.22742213 |
| Neuroactive ligand-receptor interaction | F2RL2 | rs2455236  | liver                | 1.90E-05              | 8.20E-01       | 2.30E-01 | 5.14E-01   |

| Pathway                                 | Gene   | eSNP       | Tissue               | SNP-Expression Pvalue | SNP-T2D Pvalue |          |            |
|-----------------------------------------|--------|------------|----------------------|-----------------------|----------------|----------|------------|
|                                         |        |            |                      |                       | DIAGRAM        | WTCCC    | Non-WTCCC  |
| Neuroactive ligand-receptor interaction | FPR1   | rs10422751 | omental adipose      | 1.50E-06              | NA             | 1.80E-01 | NA         |
| Neuroactive ligand-receptor interaction | FPRL1  | rs4802863  | subcutaneous adipose | 5.50E-09              | NA             | 2.70E-01 | NA         |
| Neuroactive ligand-receptor interaction | FPRL2  | rs4464193  | liver                | 1.00E-04              | 3.70E-01       | 9.60E-01 | 2.29E-01   |
| Neuroactive ligand-receptor interaction | GABBR2 | rs6478563  | liver                | 5.30E-05              | 8.50E-01       | 8.50E-01 | 9.13E-01   |
| Neuroactive ligand-receptor interaction | GABRA2 | rs1504497  | subcutaneous adipose | 1.40E-06              | 5.30E-01       | 6.70E-01 | 5.98E-01   |
| Neuroactive ligand-receptor interaction | GABRA5 | rs6576628  | liver                | 1.60E-05              | NA             | 6.80E-02 | NA         |
| Neuroactive ligand-receptor interaction | GABRB1 | rs2078610  | subcutaneous adipose | 9.70E-05              | 2.60E-02       | 2.40E-02 | 2.05E-01   |
| Neuroactive ligand-receptor interaction | GABRB3 | rs4906679  | omental adipose      | 9.90E-07              | 3.70E-01       | 1.60E-02 | 4.84E-01   |
| Neuroactive ligand-receptor interaction | GABRB3 | rs4906679  | subcutaneous adipose | 3.00E-05              | 3.70E-01       | 1.60E-02 | 4.84E-01   |
| Neuroactive ligand-receptor interaction | GABRP  | rs10073556 | subcutaneous adipose | 3.70E-05              | 4.50E-01       | 5.20E-02 | 6.04E-01   |
| Neuroactive ligand-receptor interaction | GALR1  | rs2850878  | subcutaneous adipose | 5.60E-07              | 9.40E-01       | 6.80E-02 | 1.72E-01   |
| Neuroactive ligand-receptor interaction | GALR3  | rs5756685  | liver                | 5.90E-05              | NA             | 1.70E-01 | NA         |
| Neuroactive ligand-receptor interaction | GH1    | rs2008018  | omental adipose      | 9.90E-05              | 4.50E-01       | 5.80E-01 | 5.48E-01   |
| Neuroactive ligand-receptor interaction | GHR    | rs276260   | omental adipose      | 7.20E-05              | 2.40E-01       | 1.80E-01 | 5.83E-01   |
| Neuroactive ligand-receptor interaction | GHR    | rs276260   | subcutaneous adipose | 2.50E-05              | 2.40E-01       | 1.80E-01 | 5.83E-01   |
| Neuroactive ligand-receptor interaction | GHSR   | rs2041692  | liver                | 0                     | 0.14           | 0.7      | 0.08257134 |
| Neuroactive ligand-receptor interaction | GLP1R  | rs9394492  | omental adipose      | 1.50E-05              | 4.20E-01       | 8.50E-01 | 3.34E-01   |

| Pathway                                 | Gene   | eSNP       | Tissue               | SNP-Expression Pvalue | SNP-T2D Pvalue |          |            |
|-----------------------------------------|--------|------------|----------------------|-----------------------|----------------|----------|------------|
|                                         |        |            |                      |                       | DIAGRAM        | WTCCC    | Non-WTCCC  |
| Neuroactive ligand-receptor interaction | GLRB   | rs12508572 | liver                | 1.50E-10              | 8.80E-01       | 2.00E-01 | 4.10E-01   |
| Neuroactive ligand-receptor interaction | GPR156 | rs4234654  | liver                | 4.20E-05              | 3.30E-01       | 9.60E-01 | 1.90E-01   |
| Neuroactive ligand-receptor interaction | GPR83  | rs7950328  | liver                | 3.30E-10              | 1.50E-01       | 3.40E-02 | 7.74E-01   |
| Neuroactive ligand-receptor interaction | GRID1  | rs874758   | subcutaneous adipose | 5.60E-07              | 8.00E-02       | 6.20E-03 | 8.25E-01   |
| Neuroactive ligand-receptor interaction | GRIK1  | rs2832390  | liver                | 5.80E-06              | 2.30E-02       | 2.00E-04 | 8.78E-01   |
| Neuroactive ligand-receptor interaction | GRIK2  | rs1925227  | omental adipose      | 3.40E-07              | 5.80E-02       | 6.60E-02 | 2.52E-01   |
| Neuroactive ligand-receptor interaction | GRIK3  | rs2492301  | subcutaneous adipose | 8.10E-05              | 5.30E-01       | 1.40E-01 | 7.50E-01   |
| Neuroactive ligand-receptor interaction | GRIN2C | rs6501741  | omental adipose      | 4.30E-05              | 7.10E-03       | 3.00E-02 | 4.73E-02   |
| Neuroactive ligand-receptor interaction | GRIN3A | rs2786798  | liver                | 0                     | 0.53           | 0.29     | 0.98586863 |
| Neuroactive ligand-receptor interaction | GRIN3B | rs1860661  | liver                | 0                     | NA             | 0.51     | NA         |
| Neuroactive ligand-receptor interaction | GRM1   | rs3804295  | subcutaneous adipose | 6.30E-05              | 2.30E-01       | 1.60E-01 | 5.95E-01   |
| Neuroactive ligand-receptor interaction | GRM5   | rs2226624  | omental adipose      | 0.00012               | 0.71           | 0.71     | 0.82910397 |
| Neuroactive ligand-receptor interaction | GRM7   | rs7641476  | subcutaneous adipose | 5.60E-13              | 9.10E-01       | 8.80E-02 | 2.23E-01   |
| Neuroactive ligand-receptor interaction | GRM8   | rs2040502  | liver                | 6.00E-06              | 2.80E-04       | 6.90E-03 | 4.24E-03   |
| Neuroactive ligand-receptor interaction | HCRTR2 | rs2653363  | omental adipose      | 0.00011               | 0.0032         | 0.0082   | 0.05042273 |
| Neuroactive ligand-receptor interaction | HRH1   | rs2171543  | liver                | 3.80E-07              | 8.10E-01       | 5.10E-01 | 8.43E-01   |
| Neuroactive ligand-receptor interaction | HTR1F  | rs17467509 | omental adipose      | 0.00013               | 0.98           | 0.88     | 0.93069642 |

| Pathway                                 | Gene   | eSNP       | Tissue               | SNP-Expression Pvalue | SNP-T2D Pvalue |          |            |
|-----------------------------------------|--------|------------|----------------------|-----------------------|----------------|----------|------------|
|                                         |        |            |                      |                       | DIAGRAM        | WTCCC    | Non-WTCCC  |
| Neuroactive ligand-receptor interaction | HTR2B  | rs1472959  | omental adipose      | 8.40E-06              | 8.30E-01       | 2.70E-02 | 1.37E-01   |
| Neuroactive ligand-receptor interaction | HTR2B  | rs1472959  | subcutaneous adipose | 8.40E-05              | 8.30E-01       | 2.70E-02 | 1.37E-01   |
| Neuroactive ligand-receptor interaction | HTR7   | rs7895851  | omental adipose      | 9.80E-05              | 3.10E-01       | 8.40E-03 | 4.73E-01   |
| Neuroactive ligand-receptor interaction | LEPR   | rs6673324  | liver                | 4.80E-05              | 1.30E-01       | 6.20E-02 | 5.52E-01   |
| Neuroactive ligand-receptor interaction | LHCGR  | rs6705602  | omental adipose      | 6.90E-05              | 7.40E-01       | 1.50E-01 | 4.84E-01   |
| Neuroactive ligand-receptor interaction | LTB4R  | rs12895335 | subcutaneous adipose | 6.60E-05              | 7.80E-02       | 5.70E-02 | 3.63E-01   |
| Neuroactive ligand-receptor interaction | MC3R   | rs882678   | liver                | 9.80E-06              | 4.00E-01       | 1.80E-01 | 9.31E-01   |
| Neuroactive ligand-receptor interaction | MC5R   | rs2159942  | subcutaneous adipose | 8.60E-06              | 7.40E-01       | 7.20E-01 | 8.64E-01   |
| Neuroactive ligand-receptor interaction | MTNR1A | rs7687823  | omental adipose      | 0.00012               | 0.69           | 0.41     | 0.91145051 |
| Neuroactive ligand-receptor interaction | NMUR1  | rs1667301  | omental adipose      | 2.60E-05              | 9.80E-01       | 2.30E-01 | 3.51E-01   |
| Neuroactive ligand-receptor interaction | NMUR1  | rs1667301  | subcutaneous adipose | 0.00013               | 0.98           | 0.23     | 0.35074275 |
| Neuroactive ligand-receptor interaction | NMUR2  | rs11959584 | subcutaneous adipose | 2.90E-05              | 6.90E-01       | 6.70E-01 | 8.34E-01   |
| Neuroactive ligand-receptor interaction | NPFFR2 | rs1402162  | omental adipose      | 7.30E-05              | 1.10E-02       | 3.50E-02 | 6.78E-02   |
| Neuroactive ligand-receptor interaction | NPY1R  | rs11732470 | subcutaneous adipose | 2.00E-09              | 4.60E-02       | 3.10E-02 | 3.04E-01   |
| Neuroactive ligand-receptor interaction | NPY5R  | rs11732470 | subcutaneous adipose | 8.70E-05              | 4.60E-02       | 3.10E-02 | 3.04E-01   |
| Neuroactive ligand-receptor interaction | NR3C1  | rs33383    | liver                | 8.30E-05              | 6.30E-01       | 3.80E-01 | 9.68E-01   |
| Neuroactive ligand-receptor interaction | NR3C1  | rs33383    | omental adipose      | 1.60E-05              | 6.30E-01       | 3.80E-01 | 9.68E-01   |

| Pathway                                 | Gene   | eSNP       | Tissue               | SNP-Expression Pvalue | SNP-T2D Pvalue |          |            |
|-----------------------------------------|--------|------------|----------------------|-----------------------|----------------|----------|------------|
|                                         |        |            |                      |                       | DIAGRAM        | WTCCC    | Non-WTCCC  |
| Neuroactive ligand-receptor interaction | NR3C1  | rs33383    | subcutaneous adipose | 9.90E-11              | 6.30E-01       | 3.80E-01 | 9.68E-01   |
| Neuroactive ligand-receptor interaction | OPRK1  | rs10958356 | subcutaneous adipose | 1.20E-06              | 5.70E-02       | 2.20E-01 | 9.88E-02   |
| Neuroactive ligand-receptor interaction | OPRL1  | rs6062661  | subcutaneous adipose | 2.70E-05              | 2.60E-01       | 2.90E-03 | 4.01E-01   |
| Neuroactive ligand-receptor interaction | P2RX1  | rs9904166  | subcutaneous adipose | 4.50E-06              | NA             | 2.80E-01 | NA         |
| Neuroactive ligand-receptor interaction | P2RX2  | rs5744750  | omental adipose      | 8.80E-06              | 5.40E-01       | 2.50E-02 | 3.38E-01   |
| Neuroactive ligand-receptor interaction | P2RX3  | rs10400305 | liver                | 1.30E-05              | 1.90E-01       | 2.70E-01 | 3.53E-01   |
| Neuroactive ligand-receptor interaction | P2RX4  | rs1180051  | liver                | 2.10E-09              | 1.10E-01       | 6.10E-02 | 4.80E-01   |
| Neuroactive ligand-receptor interaction | P2RX4  | rs1180051  | omental adipose      | 1.00E-08              | 1.10E-01       | 6.10E-02 | 4.80E-01   |
| Neuroactive ligand-receptor interaction | P2RX4  | rs1180051  | subcutaneous adipose | 5.90E-06              | 1.10E-01       | 6.10E-02 | 4.80E-01   |
| Neuroactive ligand-receptor interaction | P2RX7  | rs1180012  | liver                | 1.90E-05              | 6.50E-01       | 6.70E-01 | 7.75E-01   |
| Neuroactive ligand-receptor interaction | P2RY13 | rs1873619  | liver                | 1.10E-11              | 6.90E-01       | 2.60E-01 | 7.22E-01   |
| Neuroactive ligand-receptor interaction | P2RY13 | rs2242353  | liver                | 6.30E-11              | 6.30E-01       | 2.60E-01 | 8.10E-01   |
| Neuroactive ligand-receptor interaction | P2RY2  | rs366066   | subcutaneous adipose | 8.90E-05              | NA             | 3.00E-01 | NA         |
| Neuroactive ligand-receptor interaction | P2RY6  | rs7925649  | subcutaneous adipose | 2.90E-06              | 1.90E-01       | 6.90E-01 | 1.35E-01   |
| Neuroactive ligand-receptor interaction | PAR3   | rs3781128  | liver                | 0                     | 0.28           | 0.26     | 0.55522983 |
| Neuroactive ligand-receptor interaction | PRLR   | rs10040617 | liver                | 7.20E-05              | 9.30E-01       | 2.30E-01 | 3.98E-01   |
| Neuroactive ligand-receptor interaction | PRSS3  | rs1856201  | liver                | 8.20E-06              | 4.10E-02       | 5.50E-01 | 1.87E-02   |

| Pathway                                 | Gene   | eSNP       | Tissue               | SNP-Expression Pvalue | SNP-T2D Pvalue |          |           |
|-----------------------------------------|--------|------------|----------------------|-----------------------|----------------|----------|-----------|
|                                         |        |            |                      |                       | DIAGRAM        | WTCCC    | Non-WTCCC |
| Neuroactive ligand-receptor interaction | PTAFR  | rs1053107  | omental adipose      | 7.90E-07              | 8.20E-01       | 3.10E-01 | 6.15E-01  |
| Neuroactive ligand-receptor interaction | PTGDR  | rs708486   | subcutaneous adipose | 1.60E-12              | 9.60E-02       | 5.50E-02 | 4.47E-01  |
| Neuroactive ligand-receptor interaction | PTGER2 | rs708519   | omental adipose      | 4.80E-07              | 1.70E-01       | 2.00E-01 | 3.85E-01  |
| Neuroactive ligand-receptor interaction | PTGER3 | rs1891417  | subcutaneous adipose | 2.50E-05              | 2.10E-01       | 2.60E-01 | 4.06E-01  |
| Neuroactive ligand-receptor interaction | PTGER3 | rs2796200  | subcutaneous adipose | 4.50E-05              | 2.60E-01       | 2.60E-01 | 5.13E-01  |
| Neuroactive ligand-receptor interaction | PTGFR  | rs12737480 | liver                | 9.30E-07              | 6.30E-01       | 1.30E-01 | 5.80E-01  |
| Neuroactive ligand-receptor interaction | PTGIR  | rs931647   | liver                | 5.00E-08              | 1.30E-02       | 3.50E-03 | 2.76E-01  |
| Neuroactive ligand-receptor interaction | PTGIR  | rs931647   | subcutaneous adipose | 1.90E-06              | 1.30E-02       | 3.50E-03 | 2.76E-01  |
| Neuroactive ligand-receptor interaction | PTHR1  | rs7633581  | omental adipose      | 3.10E-05              | 2.30E-01       | 6.00E-02 | 8.82E-01  |
| Neuroactive ligand-receptor interaction | PTHR2  | rs4673402  | subcutaneous adipose | 2.80E-20              | 6.80E-01       | 1.10E-01 | 4.74E-01  |
| Neuroactive ligand-receptor interaction | PTHR2  | rs4675764  | subcutaneous adipose | 9.10E-20              | 6.80E-01       | 1.10E-01 | 4.74E-01  |
| Neuroactive ligand-receptor interaction | SCTR   | rs6750751  | subcutaneous adipose | 6.90E-05              | 7.80E-01       | 3.30E-01 | 6.91E-01  |
| Neuroactive ligand-receptor interaction | SSTR2  | rs6501584  | subcutaneous adipose | 6.50E-05              | 3.70E-01       | 6.70E-02 | 8.15E-01  |
| Neuroactive ligand-receptor interaction | TACR2  | rs4745987  | omental adipose      | 3.50E-07              | 1.00E-01       | 2.80E-01 | 1.59E-01  |
| Neuroactive ligand-receptor interaction | THRB   | rs9812189  | omental adipose      | 2.70E-07              | 8.10E-02       | 6.70E-02 | 3.46E-01  |
| Neuroactive ligand-receptor interaction | TRPV1  | rs17707155 | omental adipose      | 9.40E-05              | 3.80E-01       | 7.20E-01 | 3.53E-01  |
| Neuroactive ligand-receptor interaction | TSPO   | rs11574528 | liver                | 3.30E-05              | 5.20E-01       | 8.70E-03 | 2.21E-01  |

| Pathway                                 | Gene    | eSNP       | Tissue               | SNP-Expression Pvalue | SNP-T2D Pvalue |          |            |
|-----------------------------------------|---------|------------|----------------------|-----------------------|----------------|----------|------------|
|                                         |         |            |                      |                       | DIAGRAM        | WTCCC    | Non-WTCCC  |
| Neuroactive ligand-receptor interaction | TSPO    | rs11574528 | omental adipose      | 9.10E-07              | 5.20E-01       | 8.70E-03 | 2.21E-01   |
| Neuroactive ligand-receptor interaction | VIPR1   | rs342541   | liver                | 1.70E-08              | 5.00E-01       | 4.50E-03 | 1.75E-01   |
| Neuroactive ligand-receptor interaction | VIPR1   | rs342541   | subcutaneous adipose | 1.10E-05              | 5.00E-01       | 4.50E-03 | 1.75E-01   |
| Neuroactive ligand-receptor interaction | VIPR2   | rs1124425  | subcutaneous adipose | 1.40E-06              | 6.00E-02       | 2.30E-01 | 1.01E-01   |
| N-Glycan biosynthesis                   | ALG1    | rs3760030  | liver                | 7.60E-34              | NA             | 3.30E-01 | NA         |
| N-Glycan biosynthesis                   | ALG1    | rs3760030  | omental adipose      | 7.10E-42              | NA             | 3.30E-01 | NA         |
| N-Glycan biosynthesis                   | ALG1    | rs3760030  | subcutaneous adipose | 1.80E-33              | NA             | 3.30E-01 | NA         |
| N-Glycan biosynthesis                   | ALG10   | rs11053254 | liver                | 2.40E-06              | 5.20E-01       | 9.20E-02 | 6.41E-01   |
| N-Glycan biosynthesis                   | ALG11   | rs6650384  | liver                | 0                     | 0.42           | 0.52     | 0.54877316 |
| N-Glycan biosynthesis                   | ALG12   | rs6009870  | omental adipose      | 4.90E-06              | NA             | 1.10E-01 | NA         |
| N-Glycan biosynthesis                   | ALG14   | rs3789445  | subcutaneous adipose | 1.40E-05              | 5.30E-02       | 6.10E-04 | 9.36E-01   |
| N-Glycan biosynthesis                   | ALG3    | rs17774396 | omental adipose      | 4.20E-09              | NA             | 3.20E-02 | NA         |
| N-Glycan biosynthesis                   | ALG3    | rs17774396 | subcutaneous adipose | 2.70E-08              | NA             | 3.20E-02 | NA         |
| N-Glycan biosynthesis                   | ALG6    | rs3004318  | omental adipose      | 4.00E-05              | 9.30E-01       | 3.70E-01 | 5.48E-01   |
| N-Glycan biosynthesis                   | ALG8    | rs567697   | liver                | 1.60E-07              | 1.40E-01       | 2.20E-01 | 2.90E-01   |
| N-Glycan biosynthesis                   | ALG8    | rs567697   | omental adipose      | 2.80E-08              | 1.40E-01       | 2.20E-01 | 2.90E-01   |
| N-Glycan biosynthesis                   | ALG8    | rs567697   | subcutaneous adipose | 2.70E-05              | 1.40E-01       | 2.20E-01 | 2.90E-01   |
| N-Glycan biosynthesis                   | B4GALT1 | rs10971438 | subcutaneous adipose | 5.30E-05              | 5.90E-01       | 1.40E-01 | 6.58E-01   |
| N-Glycan biosynthesis                   | B4GALT3 | rs11576830 | subcutaneous adipose | 3.50E-05              | 3.50E-01       | 3.70E-01 | 5.66E-01   |
| N-Glycan biosynthesis                   | DAD1    | rs3811189  | subcutaneous adipose | 0.00011               | 0.45           | 0.094    | 0.76208262 |
| N-Glycan biosynthesis                   | DDOST   | rs3738133  | subcutaneous adipose | 6.10E-05              | 3.10E-01       | 6.60E-01 | 2.92E-01   |
| N-Glycan biosynthesis                   | DPAGT1  | rs639373   | liver                | 2.80E-06              | 1.30E-01       | 7.00E-01 | 7.36E-02   |
| N-Glycan biosynthesis                   | DPM2    | rs7874186  | liver                | 7.80E-08              | 2.10E-01       | 3.20E-03 | 5.23E-01   |
| N-Glycan biosynthesis                   | DPM2    | rs7874186  | omental adipose      | 3.00E-10              | 2.10E-01       | 3.20E-03 | 5.23E-01   |
| N-Glycan biosynthesis                   | DPM2    | rs7874186  | subcutaneous adipose | 7.00E-07              | 2.10E-01       | 3.20E-03 | 5.23E-01   |
| N-Glycan biosynthesis                   | FUT8    | rs10132229 | omental adipose      | 3.80E-05              | 6.60E-01       | 1.30E-01 | 5.41E-01   |
| N-Glycan biosynthesis                   | MAN1A1  | rs924397   | liver                | 5.40E-07              | 3.00E-01       | 5.10E-02 | 8.92E-01   |



| Pathway               | Gene   | eSNP       | Tissue               | SNP-Expression Pvalue | SNP-T2D Pvalue |          |            |
|-----------------------|--------|------------|----------------------|-----------------------|----------------|----------|------------|
|                       |        |            |                      |                       | DIAGRAM        | WTCCC    | Non-WTCCC  |
| N-Glycan biosynthesis | MAN1A2 | rs2767322  | subcutaneous adipose | 2.70E-06              | 8.40E-02       | 4.90E-03 | 8.98E-01   |
| N-Glycan biosynthesis | MAN1B1 | rs4880201  | liver                | 7.10E-07              | NA             | 8.20E-02 | NA         |
| N-Glycan biosynthesis | MAN1B1 | rs4880201  | omental adipose      | 1.30E-05              | NA             | 8.20E-02 | NA         |
| N-Glycan biosynthesis | MAN1B1 | rs4880201  | subcutaneous adipose | 1.60E-05              | NA             | 8.20E-02 | NA         |
| N-Glycan biosynthesis | MAN1C1 | rs760599   | liver                | 0                     | 0.00095        | 0.2      | 0.00038527 |
| N-Glycan biosynthesis | MAN1C1 | rs760599   | liver                | 3.20E-10              | 9.50E-04       | 2.00E-01 | 3.85E-04   |
| N-Glycan biosynthesis | MAN2A1 | rs11744065 | subcutaneous adipose | 5.70E-05              | 2.40E-01       | 6.90E-03 | 5.83E-01   |
| N-Glycan biosynthesis | MGAT2  | rs4900927  | liver                | 1.00E-04              | 1.50E-01       | 8.50E-03 | 9.00E-01   |
| N-Glycan biosynthesis | MGAT2  | rs4900928  | liver                | 9.50E-05              | 1.80E-01       | 8.50E-03 | 7.93E-01   |
| N-Glycan biosynthesis | MGAT3  | rs5757373  | omental adipose      | 3.80E-05              | 2.90E-01       | 3.80E-01 | 4.48E-01   |
| N-Glycan biosynthesis | MGAT4A | rs2276645  | subcutaneous adipose | 9.50E-05              | 9.70E-01       | 1.70E-01 | 2.92E-01   |
| N-Glycan biosynthesis | MGAT5  | rs3748900  | subcutaneous adipose | 4.90E-05              | 3.50E-01       | 2.00E-01 | 7.93E-01   |
| N-Glycan biosynthesis | RFT1   | rs2581795  | liver                | 9.70E-05              | NA             | 9.00E-01 | NA         |
| N-Glycan biosynthesis | RPN1   | rs7429360  | omental adipose      | 4.40E-05              | 2.10E-01       | 2.30E-01 | 4.41E-01   |
| N-Glycan biosynthesis | RPN1   | rs7429360  | subcutaneous adipose | 2.40E-05              | 2.10E-01       | 2.30E-01 | 4.41E-01   |
| N-Glycan biosynthesis | STT3B  | rs3792551  | omental adipose      | 1.50E-13              | NA             | 1.70E-02 | NA         |
| N-Glycan biosynthesis | STT3B  | rs3792551  | subcutaneous adipose | 2.70E-06              | NA             | 1.70E-02 | NA         |
| Pancreatic cancer     | ACVR1C | rs13383985 | liver                | 5.90E-06              | NA             | 4.90E-01 | NA         |
| Pancreatic cancer     | BRAF   | rs10487888 | omental adipose      | 5.60E-07              | 5.70E-01       | 3.60E-01 | 9.60E-01   |
| Pancreatic cancer     | BRAF   | rs10487888 | subcutaneous adipose | 7.30E-08              | 5.70E-01       | 3.60E-01 | 9.60E-01   |
| Pancreatic cancer     | CASP9  | rs11576404 | omental adipose      | 8.00E-07              | 2.50E-01       | 4.90E-02 | 9.94E-01   |
| Pancreatic cancer     | CCND1  | rs4584599  | subcutaneous adipose | 1.10E-06              | NA             | 2.40E-02 | NA         |
| Pancreatic cancer     | CDK4   | rs867008   | subcutaneous adipose | 1.30E-05              | 4.30E-01       | 3.80E-01 | 6.99E-01   |
| Pancreatic cancer     | CDK6   | rs2237572  | omental adipose      | 6.80E-07              | 4.30E-01       | 1.90E-01 | 9.70E-01   |
| Pancreatic cancer     | E2F3   | rs9368222  | subcutaneous adipose | 5.20E-06              | 1.50E-11       | 1.50E-05 | 4.42E-09   |
| Pancreatic cancer     | EGFR   | rs13244925 | subcutaneous adipose | 2.10E-05              | 2.90E-01       | 1.10E-01 | 8.58E-01   |
| Pancreatic cancer     | IKBKB  | rs7015100  | omental adipose      | 3.70E-06              | 9.80E-01       | 3.70E-01 | 4.91E-01   |
| Pancreatic cancer     | KRAS   | rs11048019 | omental adipose      | 0.00011               | 0.051          | 0.041    | 0.28980561 |
| Pancreatic cancer     | KRAS   | rs4963884  | omental adipose      | 5.90E-05              | 6.30E-02       | 4.10E-02 | 3.52E-01   |
| Pancreatic cancer     | MAP2K1 | rs11857642 | subcutaneous adipose | 1.30E-08              | 7.20E-01       | 6.60E-01 | 8.87E-01   |

| Pathway                               | Gene   | eSNP       | Tissue               | SNP-Expression Pvalue | SNP-T2D Pvalue |          |            |
|---------------------------------------|--------|------------|----------------------|-----------------------|----------------|----------|------------|
|                                       |        |            |                      |                       | DIAGRAM        | WTCCC    | Non-WTCCC  |
| Pancreatic cancer                     | MAPK10 | rs10022237 | liver                | 1.80E-05              | 4.30E-02       | 4.40E-02 | 2.37E-01   |
| Pancreatic cancer                     | MAPK3  | rs11865086 | subcutaneous adipose | 9.30E-05              | 8.00E-01       | 4.10E-01 | 7.54E-01   |
| Pancreatic cancer                     | MAPK9  | rs3828686  | liver                | 2.90E-05              | 4.70E-01       | 8.70E-02 | 7.05E-01   |
| Pancreatic cancer                     | NFKB1  | rs3774937  | liver                | 5.20E-05              | 5.50E-01       | 3.80E-01 | 9.04E-01   |
| Pancreatic cancer                     | PLD1   | rs4894512  | subcutaneous adipose | 1.00E-04              | 9.60E-01       | 2.60E-01 | 4.02E-01   |
| Pancreatic cancer                     | RAC1   | rs2347338  | omental adipose      | 8.00E-11              | 9.10E-01       | 1.30E-01 | 2.87E-01   |
| Pancreatic cancer                     | RAC1   | rs2347338  | subcutaneous adipose | 4.70E-08              | 9.10E-01       | 1.30E-01 | 2.87E-01   |
| Pancreatic cancer                     | RAD51  | rs1044474  | omental adipose      | 6.50E-16              | 2.20E-01       | 7.70E-02 | 7.83E-01   |
| Pancreatic cancer                     | RAD51  | rs1044474  | subcutaneous adipose | 2.60E-08              | 2.20E-01       | 7.70E-02 | 7.83E-01   |
| Pancreatic cancer                     | RAF1   | rs7617041  | liver                | 3.10E-05              | 3.60E-01       | 4.00E-01 | 5.55E-01   |
| Pancreatic cancer                     | RALBP1 | rs9960247  | subcutaneous adipose | 6.70E-05              | 2.30E-01       | 5.00E-02 | 9.33E-01   |
| Pancreatic cancer                     | RELA   | rs11227306 | omental adipose      | 6.20E-06              | 5.00E-01       | 3.30E-03 | 1.52E-01   |
| Pancreatic cancer                     | SMAD2  | rs8085335  | subcutaneous adipose | 4.40E-05              | 5.20E-01       | 9.30E-02 | 6.44E-01   |
| Pancreatic cancer                     | SMAD3  | rs266332   | liver                | 2.90E-05              | 4.60E-02       | 1.80E-03 | 8.02E-01   |
| Pancreatic cancer                     | SMAD4  | rs12456284 | omental adipose      | 1.80E-05              | 1.30E-01       | 1.60E-01 | 3.34E-01   |
| Pancreatic cancer                     | STAT3  | rs1076188  | subcutaneous adipose | 1.30E-05              | NA             | 3.90E-01 | NA         |
| Pancreatic cancer                     | TGFA   | rs399819   | liver                | 3.90E-06              | 2.70E-01       | 6.60E-02 | 9.62E-01   |
| Pancreatic cancer                     | TGFBR1 | rs10819634 | liver                | 4.40E-05              | 7.30E-01       | 4.30E-02 | 2.49E-01   |
| Pancreatic cancer                     | TGFBR2 | rs7625163  | liver                | 0                     | 0.7            | 0.24     | 0.67954428 |
| Pancreatic cancer                     | VEGF   | rs3025033  | omental adipose      | 1.80E-06              | NA             | 4.10E-02 | NA         |
| Pancreatic cancer                     | VEGFB  | rs3751120  | omental adipose      | 1.50E-10              | 8.70E-02       | 2.30E-02 | 5.89E-01   |
| Pancreatic cancer                     | VEGFB  | rs3751120  | subcutaneous adipose | 1.30E-05              | 8.70E-02       | 2.30E-02 | 5.89E-01   |
| Pancreatic cancer                     | VEGFC  | rs1449738  | omental adipose      | 9.00E-05              | 1.40E-01       | 4.40E-01 | 1.54E-01   |
| Phosphatidylinositol signaling system | CALM1  | rs3213718  | liver                | 2.60E-06              | 1.50E-01       | 4.50E-02 | 7.04E-01   |
| Phosphatidylinositol signaling system | CALM2  | rs13430277 | omental adipose      | 1.10E-05              | 3.60E-01       | 1.80E-03 | 2.12E-01   |
| Phosphatidylinositol signaling system | CALM3  | rs11083846 | omental adipose      | 4.20E-05              | 7.60E-01       | 6.30E-01 | 9.72E-01   |
| Phosphatidylinositol signaling system | CALML5 | rs7098007  | liver                | 5.90E-05              | 7.30E-01       | 6.60E-02 | 3.15E-01   |

| Pathway                               | Gene   | eSNP       | Tissue               | SNP-Expression Pvalue | SNP-T2D Pvalue |          |            |
|---------------------------------------|--------|------------|----------------------|-----------------------|----------------|----------|------------|
|                                       |        |            |                      |                       | DIAGRAM        | WTCCC    | Non-WTCCC  |
| Phosphatidylinositol signaling system | CALML6 | rs4648592  | omental adipose      | 4.80E-05              | 9.10E-01       | 3.10E-01 | 5.08E-01   |
| Phosphatidylinositol signaling system | CALML6 | rs4648592  | subcutaneous adipose | 9.10E-05              | 9.10E-01       | 3.10E-01 | 5.08E-01   |
| Phosphatidylinositol signaling system | CARKL  | rs1873880  | omental adipose      | 3.20E-06              | NA             | 8.20E-03 | NA         |
| Phosphatidylinositol signaling system | CARKL  | rs1873880  | subcutaneous adipose | 1.60E-06              | NA             | 8.20E-03 | NA         |
| Phosphatidylinositol signaling system | CDS2   | rs1292197  | liver                | 6.50E-06              | 5.10E-02       | 5.60E-02 | 2.44E-01   |
| Phosphatidylinositol signaling system | CDS2   | rs1292197  | omental adipose      | 1.10E-05              | 5.10E-02       | 5.60E-02 | 2.44E-01   |
| Phosphatidylinositol signaling system | CDS2   | rs1292197  | subcutaneous adipose | 1.10E-06              | 5.10E-02       | 5.60E-02 | 2.44E-01   |
| Phosphatidylinositol signaling system | DGKB   | rs6461048  | liver                | 1.40E-05              | NA             | 2.60E-01 | NA         |
| Phosphatidylinositol signaling system | DGKE   | rs1879145  | liver                | 3.10E-06              | 9.30E-01       | 3.60E-01 | 5.38E-01   |
| Phosphatidylinositol signaling system | DGKQ   | rs2290405  | omental adipose      | 2.20E-05              | 7.20E-01       | 1.20E-01 | 4.49E-01   |
| Phosphatidylinositol signaling system | DGKQ   | rs2290405  | subcutaneous adipose | 8.70E-06              | 7.20E-01       | 1.20E-01 | 4.49E-01   |
| Phosphatidylinositol signaling system | IMPA1  | rs7007207  | omental adipose      | 1.90E-16              | 3.50E-01       | 1.40E-01 | 9.16E-01   |
| Phosphatidylinositol signaling system | IMPA1  | rs7007207  | subcutaneous adipose | 2.40E-14              | 3.50E-01       | 1.40E-01 | 9.16E-01   |
| Phosphatidylinositol signaling system | IMPA2  | rs7235296  | liver                | 6.70E-05              | 4.40E-01       | 8.60E-02 | 7.54E-01   |
| Phosphatidylinositol signaling system | INPP4A | rs11676357 | omental adipose      | 1.40E-06              | 6.30E-01       | 1.80E-01 | 6.80E-01   |
| Phosphatidylinositol signaling system | INPP4B | rs17701271 | liver                | 7.40E-05              | 9.20E-01       | 6.20E-01 | 7.94E-01   |
| Phosphatidylinositol signaling system | INPP5D | rs2138580  | liver                | 0                     | 0.81           | 0.91     | 0.80856366 |
| Phosphatidylinositol signaling system | INPP5E | rs11103033 | omental adipose      | 5.10E-06              | 2.60E-03       | 2.10E-02 | 2.06E-02   |
| Phosphatidylinositol signaling system | ITPK1  | rs11160071 | subcutaneous adipose | 2.90E-05              | 7.00E-01       | 8.80E-02 | 4.00E-01   |

| Pathway                               | Gene    | eSNP       | Tissue               | SNP-Expression Pvalue | SNP-T2D Pvalue |          |            |
|---------------------------------------|---------|------------|----------------------|-----------------------|----------------|----------|------------|
|                                       |         |            |                      |                       | DIAGRAM        | WTCCC    | Non-WTCCC  |
| Phosphatidylinositol signaling system | ITPKB   | rs837748   | omental adipose      | 1.00E-04              | 1.50E-01       | 5.00E-01 | 1.46E-01   |
| Phosphatidylinositol signaling system | ITPR1   | rs4684443  | liver                | 1.70E-06              | 8.00E-03       | 1.70E-02 | 7.95E-02   |
| Phosphatidylinositol signaling system | ITPR2   | rs10506007 | omental adipose      | 4.20E-05              | 6.80E-01       | 5.20E-01 | 9.58E-01   |
| Phosphatidylinositol signaling system | ITPR3   | rs7769838  | liver                | 1.60E-06              | 7.90E-01       | 2.20E-01 | 5.35E-01   |
| Phosphatidylinositol signaling system | PIK3C2G | rs4385947  | liver                | 3.10E-07              | 4.50E-03       | 1.00E-02 | 6.25E-02   |
| Phosphatidylinositol signaling system | PIK3C3  | rs1944967  | subcutaneous adipose | 1.20E-06              | 3.40E-01       | 3.60E-01 | 5.58E-01   |
| Phosphatidylinositol signaling system | PIK4CA  | rs165862   | omental adipose      | 1.20E-08              | 1.40E-01       | 2.10E-01 | 3.00E-01   |
| Phosphatidylinositol signaling system | PIP5K1B | rs2039624  | omental adipose      | 3.80E-06              | NA             | 9.80E-02 | NA         |
| Phosphatidylinositol signaling system | PIP5K1B | rs2039624  | subcutaneous adipose | 2.60E-08              | NA             | 9.80E-02 | NA         |
| Phosphatidylinositol signaling system | PIP5K2B | rs7207178  | subcutaneous adipose | 1.50E-07              | 7.30E-01       | 1.00E-02 | 1.10E-01   |
| Phosphatidylinositol signaling system | PIP5K3  | rs6716615  | liver                | 0                     | 0.97           | 0.12     | 0.2295403  |
| Phosphatidylinositol signaling system | PLCB1   | rs978266   | subcutaneous adipose | 0.00012               | 0.47           | 0.021    | 0.39028309 |
| Phosphatidylinositol signaling system | PLCB2   | rs3743033  | liver                | 0                     | 0.23           | 0.47     | 0.2792028  |
| Phosphatidylinositol signaling system | PLCD1   | rs11129780 | subcutaneous adipose | 7.20E-08              | 2.40E-01       | 5.40E-02 | 9.40E-01   |
| Phosphatidylinositol signaling system | PLCD3   | rs12450321 | subcutaneous adipose | 7.40E-06              | 8.50E-01       | 2.40E-01 | 4.93E-01   |
| Phosphatidylinositol signaling system | PLCD4   | rs2279014  | liver                | 3.70E-05              | 8.00E-01       | 1.20E-02 | 9.41E-02   |
| Phosphatidylinositol signaling system | PLCE1   | rs11593126 | omental adipose      | 5.90E-05              | 5.20E-01       | 2.10E-01 | 9.06E-01   |
| Phosphatidylinositol signaling system | PLCG2   | rs4074445  | subcutaneous adipose | 6.50E-05              | NA             | 1.60E-01 | NA         |
| Phosphatidylinositol signaling system | PRKCA   | rs16960228 | liver                | 1.60E-06              | 5.30E-01       | 1.90E-03 | 1.02E-01   |

| Pathway                               | Gene    | eSNP       | Tissue               | SNP-Expression Pvalue | SNP-T2D Pvalue |          |            |
|---------------------------------------|---------|------------|----------------------|-----------------------|----------------|----------|------------|
|                                       |         |            |                      |                       | DIAGRAM        | WTCCC    | Non-WTCCC  |
| Phosphatidylinositol signaling system | PRKCB1  | rs12931116 | subcutaneous adipose | 2.70E-06              | 2.50E-01       | 3.20E-01 | 4.28E-01   |
| Phosphatidylinositol signaling system | PTEN    | rs406671   | subcutaneous adipose | 7.60E-05              | 8.80E-01       | 2.10E-01 | 4.23E-01   |
| Phosphatidylinositol signaling system | SYNJ1   | rs2211676  | liver                | 0                     | 0.85           | 0.48     | 0.75864791 |
| Phosphatidylinositol signaling system | SYNJ2   | rs13340445 | subcutaneous adipose | 7.00E-05              | 1.10E-01       | 7.10E-02 | 4.47E-01   |
| Positive Control Pathway              | ADAMTS9 | rs4132228  | omental              | 4.50E-07              | 7.10E-04       | 2.40E-02 | 4.04E-03   |
| Positive Control Pathway              | CDKAL1  | rs807835   | subq                 | 1.24E-05              | 4.90E-01       | 7.60E-02 | 6.36E-01   |
| Positive Control Pathway              | JAZF1   | rs1635852  | liver                | 3.55E-10              | 2.20E-05       | 2.80E-03 | 5.11E-04   |
| Positive Control Pathway              | NOTCH2  | rs2793823  | liver                | 1.46E-05              | 4.20E-03       | 4.90E-01 | 6.41E-04   |
| Positive Control Pathway              | PPARG   | rs1797912  | liver                | 5.70E-05              | 3.90E-01       | 5.70E-01 | 4.63E-01   |
| Positive Control Pathway              | TSPAN8  | rs1614565  | liver                | 2.05E-32              | 9.70E-05       | 4.70E-08 | 3.17E-01   |
| PPAR signaling pathway                | ACAA1   | rs1979845  | liver                | 5.30E-05              | NA             | 3.70E-02 | NA         |
| PPAR signaling pathway                | ACAA1   | rs1979845  | omental adipose      | 7.80E-14              | NA             | 3.70E-02 | NA         |
| PPAR signaling pathway                | ACAA1   | rs1979845  | subcutaneous adipose | 1.80E-14              | NA             | 3.70E-02 | NA         |
| PPAR signaling pathway                | ACADM   | rs7547056  | liver                | 3.80E-10              | 3.00E-01       | 9.70E-02 | 9.21E-01   |
| PPAR signaling pathway                | ACADM   | rs7547056  | omental adipose      | 4.00E-06              | 3.00E-01       | 9.70E-02 | 9.21E-01   |
| PPAR signaling pathway                | ACADM   | rs7547056  | subcutaneous adipose | 9.50E-07              | 3.00E-01       | 9.70E-02 | 9.21E-01   |
| PPAR signaling pathway                | ACOX1   | rs363796   | omental adipose      | 2.60E-08              | NA             | 4.30E-02 | NA         |
| PPAR signaling pathway                | ACOX1   | rs363796   | subcutaneous adipose | 4.00E-05              | NA             | 4.30E-02 | NA         |
| PPAR signaling pathway                | ACOX2   | rs4681689  | omental adipose      | 7.80E-06              | NA             | 5.00E-02 | NA         |
| PPAR signaling pathway                | ACOX2   | rs4681689  | subcutaneous adipose | 2.90E-06              | NA             | 5.00E-02 | NA         |
| PPAR signaling pathway                | ACOX3   | rs747580   | liver                | 3.80E-05              | 1.40E-01       | 3.70E-02 | 7.15E-01   |
| PPAR signaling pathway                | ACOX3   | rs747580   | omental adipose      | 1.10E-18              | 1.40E-01       | 3.70E-02 | 7.15E-01   |
| PPAR signaling pathway                | ACOX3   | rs747580   | subcutaneous adipose | 8.40E-07              | 1.40E-01       | 3.70E-02 | 7.15E-01   |
| PPAR signaling pathway                | ACSL1   | rs13120078 | subcutaneous adipose | 1.10E-05              | 5.90E-01       | 6.70E-02 | 4.66E-01   |
| PPAR signaling pathway                | ACSL6   | rs2306772  | liver                | 3.60E-07              | 3.80E-01       | 7.40E-02 | 8.23E-01   |
| PPAR signaling pathway                | ADIPOQ  | rs6444175  | subcutaneous adipose | 7.70E-06              | 9.30E-01       | 8.90E-01 | 9.92E-01   |
| PPAR signaling pathway                | ANGPTL4 | rs2278236  | liver                | 2.80E-08              | NA             | 2.70E-01 | NA         |
| PPAR signaling pathway                | APOA1   | rs4938316  | liver                | 0                     | 0.19           | 0.31     | 0.31783675 |

| Pathway                | Gene    | eSNP       | Tissue               | SNP-Expression Pvalue | SNP-T2D Pvalue |          |            |
|------------------------|---------|------------|----------------------|-----------------------|----------------|----------|------------|
|                        |         |            |                      |                       | DIAGRAM        | WTCCC    | Non-WTCCC  |
| PPAR signaling pathway | APOA2   | rs16857019 | omental adipose      | 2.90E-05              | 4.80E-01       | 3.40E-01 | 8.34E-01   |
| PPAR signaling pathway | AQP7    | rs675469   | liver                | 7.30E-06              | 2.40E-01       | 7.90E-02 | 8.31E-01   |
| PPAR signaling pathway | CD36    | rs1722505  | omental adipose      | 9.50E-14              | 5.20E-02       | 1.20E-02 | 5.03E-01   |
| PPAR signaling pathway | CD36    | rs1722505  | subcutaneous adipose | 5.10E-14              | 5.20E-02       | 1.20E-02 | 5.03E-01   |
| PPAR signaling pathway | CPT1B   | rs140521   | liver                | 6.80E-09              | NA             | 1.50E-01 | NA         |
| PPAR signaling pathway | CPT1B   | rs140521   | omental adipose      | 1.10E-05              | NA             | 1.50E-01 | NA         |
| PPAR signaling pathway | CPT1C   | rs10417008 | omental adipose      | 5.40E-08              | 8.10E-01       | 5.00E-01 | 8.33E-01   |
| PPAR signaling pathway | CYP4A11 | rs6692958  | liver                | 2.00E-06              | 5.90E-01       | 1.10E-03 | 5.95E-02   |
| PPAR signaling pathway | DBI     | rs6717403  | omental adipose      | 4.10E-05              | 7.80E-01       | 5.50E-02 | 2.46E-01   |
| PPAR signaling pathway | FABP1   | rs2970901  | liver                | 3.00E-05              | 1.80E-01       | 1.20E-01 | 5.45E-01   |
| PPAR signaling pathway | FABP1   | rs2970901  | subcutaneous adipose | 9.10E-07              | 1.80E-01       | 1.20E-01 | 5.45E-01   |
| PPAR signaling pathway | FABP2   | rs10084915 | liver                | 8.00E-07              | 3.60E-01       | 1.70E-01 | 8.71E-01   |
| PPAR signaling pathway | FABP3   | rs11576621 | liver                | 5.90E-08              | 1.00E-01       | 5.70E-01 | 6.83E-02   |
| PPAR signaling pathway | FABP3   | rs11576621 | omental adipose      | 6.00E-06              | 1.00E-01       | 5.70E-01 | 6.83E-02   |
| PPAR signaling pathway | FABP3   | rs11576621 | subcutaneous adipose | 9.10E-07              | 1.00E-01       | 5.70E-01 | 6.83E-02   |
| PPAR signaling pathway | FADS2   | rs174579   | omental adipose      | 4.20E-07              | 6.20E-01       | 2.30E-02 | 2.52E-01   |
| PPAR signaling pathway | LPL     | rs6586872  | subcutaneous adipose | 0.00013               | 0.78           | 0.19     | 0.50322376 |
| PPAR signaling pathway | ME1     | rs2300465  | subcutaneous adipose | 2.00E-05              | 2.60E-01       | 8.40E-02 | 8.66E-01   |
| PPAR signaling pathway | NR1H3   | rs11988    | omental adipose      | 7.10E-05              | 5.60E-01       | 1.10E-01 | 6.31E-01   |
| PPAR signaling pathway | PCK1    | rs6025610  | omental adipose      | 4.10E-07              | 2.60E-02       | 7.70E-03 | 3.48E-01   |
| PPAR signaling pathway | PCK2    | rs11623285 | omental adipose      | 5.00E-06              | NA             | 2.70E-03 | NA         |
| PPAR signaling pathway | PCK2    | rs11623285 | subcutaneous adipose | 8.90E-06              | NA             | 2.70E-03 | NA         |
| PPAR signaling pathway | PLTP    | rs4810482  | liver                | 6.40E-06              | 8.00E-01       | 2.50E-02 | 1.45E-01   |
| PPAR signaling pathway | PPARA   | rs4253772  | liver                | 4.20E-05              | 5.30E-02       | 6.10E-02 | 2.41E-01   |
| PPAR signaling pathway | PPARA   | rs4253772  | omental adipose      | 1.60E-05              | 5.30E-02       | 6.10E-02 | 2.41E-01   |
| PPAR signaling pathway | PPARD   | rs9368849  | subcutaneous adipose | 9.20E-05              | 1.70E-03       | 7.60E-04 | 1.02E-01   |
| PPAR signaling pathway | PPARG   | rs1797912  | liver                | 3.30E-05              | 3.90E-01       | 5.70E-01 | 4.63E-01   |
| PPAR signaling pathway | RXRA    | rs17664384 | liver                | 1.00E-04              | NA             | 5.50E-01 | NA         |
| PPAR signaling pathway | RXRB    | rs3129274  | omental adipose      | 1.60E-23              | 2.40E-01       | 1.00E-01 | 7.62E-01   |
| PPAR signaling pathway | RXRB    | rs3129274  | subcutaneous adipose | 3.30E-18              | 2.40E-01       | 1.00E-01 | 7.62E-01   |

| Pathway                    | Gene    | eSNP       | Tissue               | SNP-Expression Pvalue | SNP-T2D Pvalue |          |            |
|----------------------------|---------|------------|----------------------|-----------------------|----------------|----------|------------|
|                            |         |            |                      |                       | DIAGRAM        | WTCCC    | Non-WTCCC  |
| PPAR signaling pathway     | RXRG    | rs2651860  | liver                | 3.50E-06              | 1.70E-01       | 1.00E-01 | 5.64E-01   |
| PPAR signaling pathway     | SCD     | rs11190462 | omental adipose      | 1.60E-07              | 6.10E-03       | 9.20E-02 | 1.45E-02   |
| PPAR signaling pathway     | SLC27A1 | rs3815904  | omental adipose      | 5.10E-05              | 7.20E-01       | 7.10E-02 | 3.38E-01   |
| PPAR signaling pathway     | SLC27A2 | rs11853852 | subcutaneous adipose | 1.60E-07              | 2.00E-01       | 1.30E-01 | 5.78E-01   |
| PPAR signaling pathway     | SLC27A5 | rs893185   | omental adipose      | 1.30E-05              | 7.70E-01       | 5.10E-01 | 9.00E-01   |
| PPAR signaling pathway     | SLC27A6 | rs2577503  | omental adipose      | 0.00011               | 0.057          | 0.38     | 0.05340134 |
| PPAR signaling pathway     | SORBS1  | rs3193970  | liver                | 5.60E-06              | 6.40E-01       | 1.60E-01 | 6.28E-01   |
| PPAR signaling pathway     | UCP1    | rs17005845 | omental adipose      | 7.90E-05              | 4.30E-01       | 7.40E-02 | 7.29E-01   |
| TGF-beta signaling pathway | ACVR1C  | rs13383985 | liver                | 5.90E-06              | NA             | 4.90E-01 | NA         |
| TGF-beta signaling pathway | ACVR2A  | rs13004499 | subcutaneous adipose | 8.40E-05              | 2.40E-01       | 8.10E-01 | 1.51E-01   |
| TGF-beta signaling pathway | ACVR2B  | rs3935472  | omental adipose      | 0.00012               | 0.071          | 0.003    | 0.91175224 |
| TGF-beta signaling pathway | ACVRL1  | rs3847859  | omental adipose      | 5.70E-05              | NA             | 9.50E-01 | NA         |
| TGF-beta signaling pathway | AMH     | rs10407022 | omental adipose      | 4.90E-05              | NA             | 5.70E-02 | NA         |
| TGF-beta signaling pathway | AMH     | rs10407022 | subcutaneous adipose | 8.10E-05              | NA             | 5.70E-02 | NA         |
| TGF-beta signaling pathway | BMP4    | rs4444235  | omental adipose      | 7.00E-07              | 3.70E-01       | 3.70E-01 | 6.03E-01   |
| TGF-beta signaling pathway | BMP6    | rs592849   | subcutaneous adipose | 3.90E-05              | 5.40E-01       | 5.70E-01 | 6.95E-01   |
| TGF-beta signaling pathway | BMP8A   | rs4660378  | liver                | 4.70E-05              | 6.20E-02       | 1.10E-01 | 1.94E-01   |
| TGF-beta signaling pathway | BMP8B   | rs12118033 | subcutaneous adipose | 7.40E-05              | 3.10E-01       | 3.20E-01 | 5.44E-01   |
| TGF-beta signaling pathway | BMPR1A  | rs11597689 | liver                | 7.90E-06              | 3.90E-01       | 1.30E-02 | 4.18E-01   |
| TGF-beta signaling pathway | BMPR1B  | rs1434546  | omental adipose      | 0.00011               | 0.11           | 0.022    | 0.71170838 |
| TGF-beta signaling pathway | BMPR2   | rs13430786 | liver                | 1.40E-11              | 6.20E-01       | 1.70E-01 | 6.75E-01   |
| TGF-beta signaling pathway | BMPR2   | rs6747756  | liver                | 0                     | 0.63           | 0.17     | 0.66108666 |

| Pathway                    | Gene   | eSNP       | Tissue               | SNP-Expression Pvalue | SNP-T2D Pvalue |          |           |
|----------------------------|--------|------------|----------------------|-----------------------|----------------|----------|-----------|
|                            |        |            |                      |                       | DIAGRAM        | WTCCC    | Non-WTCCC |
| TGF-beta signaling pathway | CDKN2B | rs1537375  | omental adipose      | 2.40E-06              | 9.50E-02       | 2.20E-01 | 1.85E-01  |
| TGF-beta signaling pathway | CHRD   | rs11716770 | subcutaneous adipose | 3.40E-05              | NA             | 4.30E-01 | NA        |
| TGF-beta signaling pathway | CREBBP | rs129963   | omental adipose      | 1.00E-04              | NA             | 3.70E-02 | NA        |
| TGF-beta signaling pathway | CUL1   | rs1029888  | omental adipose      | 3.50E-06              | 1.80E-01       | 3.20E-01 | 2.90E-01  |
| TGF-beta signaling pathway | E2F5   | rs17811680 | liver                | 4.60E-05              | 3.30E-02       | 3.50E-01 | 2.76E-02  |
| TGF-beta signaling pathway | EP300  | rs133036   | liver                | 2.90E-05              | 1.20E-01       | 2.50E-01 | 2.19E-01  |
| TGF-beta signaling pathway | FST    | rs27323    | liver                | 1.60E-05              | 6.60E-01       | 7.70E-03 | 1.24E-01  |
| TGF-beta signaling pathway | GDF5   | rs4911494  | omental adipose      | 2.00E-06              | 8.10E-01       | 2.00E-01 | 4.84E-01  |
| TGF-beta signaling pathway | GDF5   | rs6088813  | omental adipose      | 2.00E-06              | 8.10E-01       | 2.00E-01 | 4.84E-01  |
| TGF-beta signaling pathway | ID3    | rs2920     | omental adipose      | 5.60E-05              | 4.40E-01       | 4.90E-02 | 6.06E-01  |
| TGF-beta signaling pathway | ID4    | rs1202305  | subcutaneous adipose | 2.20E-07              | 7.80E-01       | 2.50E-01 | 5.89E-01  |
| TGF-beta signaling pathway | IFNG   | rs4913277  | liver                | 8.80E-05              | 7.30E-01       | 5.30E-01 | 9.78E-01  |
| TGF-beta signaling pathway | INHBB  | rs11677557 | omental adipose      | 1.00E-04              | 3.50E-03       | 5.60E-01 | 3.44E-04  |
| TGF-beta signaling pathway | LEFTY1 | rs2755093  | omental adipose      | 3.60E-05              | 1.00E-01       | 5.30E-04 | 6.08E-01  |
| TGF-beta signaling pathway | LTBP1  | rs12618959 | liver                | 2.10E-05              | 8.10E-01       | 5.60E-02 | 2.27E-01  |
| TGF-beta signaling pathway | MAPK3  | rs11865086 | subcutaneous adipose | 9.30E-05              | 8.00E-01       | 4.10E-01 | 7.54E-01  |
| TGF-beta signaling pathway | PPP2CB | rs2956012  | liver                | 2.50E-13              | 6.30E-01       | 1.00E-01 | 5.10E-01  |
| TGF-beta signaling pathway | PPP2CB | rs2956012  | omental adipose      | 2.30E-09              | 6.30E-01       | 1.00E-01 | 5.10E-01  |
| TGF-beta signaling pathway | PPP2CB | rs2956012  | subcutaneous adipose | 5.30E-09              | 6.30E-01       | 1.00E-01 | 5.10E-01  |



| Pathway                    | Gene    | eSNP       | Tissue               | SNP-Expression Pvalue | SNP-T2D Pvalue |          |           |
|----------------------------|---------|------------|----------------------|-----------------------|----------------|----------|-----------|
|                            |         |            |                      |                       | DIAGRAM        | WTCCC    | Non-WTCCC |
| TGF-beta signaling pathway | PPP2R1A | rs6509628  | omental adipose      | 8.30E-12              | 3.10E-01       | 1.70E-01 | 7.63E-01  |
| TGF-beta signaling pathway | PPP2R1A | rs6509628  | subcutaneous adipose | 2.90E-09              | 3.10E-01       | 1.70E-01 | 7.63E-01  |
| TGF-beta signaling pathway | PPP2R1B | rs10502145 | liver                | 1.10E-05              | 5.60E-01       | 1.20E-01 | 6.56E-01  |
| TGF-beta signaling pathway | PPP2R2A | rs7829309  | liver                | 5.40E-05              | 5.90E-01       | 9.60E-01 | 4.80E-01  |
| TGF-beta signaling pathway | PPP2R2C | rs11734695 | omental adipose      | 1.80E-06              | 6.20E-01       | 3.50E-01 | 9.47E-01  |
| TGF-beta signaling pathway | RBL2    | rs4784312  | liver                | 3.30E-09              | 8.80E-04       | 2.30E-04 | 1.00E-01  |
| TGF-beta signaling pathway | RHOA    | rs9586     | omental adipose      | 3.60E-06              | 4.50E-01       | 3.00E-01 | 8.32E-01  |
| TGF-beta signaling pathway | ROCK2   | rs4669700  | omental adipose      | 5.00E-06              | 8.20E-01       | 4.20E-01 | 7.38E-01  |
| TGF-beta signaling pathway | RPS6KB1 | rs4968384  | subcutaneous adipose | 5.70E-07              | 4.20E-02       | 6.00E-02 | 1.92E-01  |
| TGF-beta signaling pathway | RPS6KB2 | rs2509712  | liver                | 1.10E-09              | 7.20E-01       | 2.30E-02 | 1.82E-01  |
| TGF-beta signaling pathway | RPS6KB2 | rs2509712  | omental adipose      | 1.50E-19              | 7.20E-01       | 2.30E-02 | 1.82E-01  |
| TGF-beta signaling pathway | RPS6KB2 | rs2509712  | subcutaneous adipose | 1.40E-17              | 7.20E-01       | 2.30E-02 | 1.82E-01  |
| TGF-beta signaling pathway | SKP1A   | rs7703433  | subcutaneous adipose | 4.70E-05              | 8.60E-01       | 4.30E-01 | 6.95E-01  |
| TGF-beta signaling pathway | SMAD1   | rs11944685 | omental adipose      | 4.20E-07              | 7.70E-01       | 2.50E-01 | 6.02E-01  |
| TGF-beta signaling pathway | SMAD1   | rs11944685 | subcutaneous adipose | 1.60E-05              | 7.70E-01       | 2.50E-01 | 6.02E-01  |
| TGF-beta signaling pathway | SMAD1   | rs2289737  | omental adipose      | 3.90E-07              | 7.90E-01       | 2.50E-01 | 5.77E-01  |
| TGF-beta signaling pathway | SMAD1   | rs2289737  | subcutaneous adipose | 1.90E-05              | 7.90E-01       | 2.50E-01 | 5.77E-01  |
| TGF-beta signaling pathway | SMAD2   | rs8085335  | subcutaneous adipose | 4.40E-05              | 5.20E-01       | 9.30E-02 | 6.44E-01  |
| TGF-beta signaling pathway | SMAD3   | rs266332   | liver                | 2.90E-05              | 4.60E-02       | 1.80E-03 | 8.02E-01  |

| Pathway                    | Gene    | eSNP       | Tissue               | SNP-Expression Pvalue | SNP-T2D Pvalue |          |            |
|----------------------------|---------|------------|----------------------|-----------------------|----------------|----------|------------|
|                            |         |            |                      |                       | DIAGRAM        | WTCCC    | Non-WTCCC  |
| TGF-beta signaling pathway | SMAD4   | rs12456284 | omental adipose      | 1.80E-05              | 1.30E-01       | 1.60E-01 | 3.34E-01   |
| TGF-beta signaling pathway | SMAD5   | rs13158661 | subcutaneous adipose | 0.00013               | 0.71           | 0.067    | 0.33641087 |
| TGF-beta signaling pathway | SMAD6   | rs12902785 | omental adipose      | 2.90E-05              | 1.40E-02       | 3.80E-03 | 2.83E-01   |
| TGF-beta signaling pathway | SMAD9   | rs6563501  | omental adipose      | 3.40E-05              | 2.30E-01       | 2.20E-02 | 8.55E-01   |
| TGF-beta signaling pathway | SMURF1  | rs10266176 | omental adipose      | 5.80E-06              | 8.50E-01       | 4.30E-01 | 7.08E-01   |
| TGF-beta signaling pathway | SMURF2  | rs17401012 | omental adipose      | 3.20E-06              | 9.20E-03       | 1.50E-01 | 1.42E-02   |
| TGF-beta signaling pathway | SP1     | rs11170555 | liver                | 4.40E-07              | 1.20E-01       | 7.10E-02 | 4.84E-01   |
| TGF-beta signaling pathway | SP1     | rs11170555 | omental adipose      | 2.80E-34              | 1.20E-01       | 7.10E-02 | 4.84E-01   |
| TGF-beta signaling pathway | SP1     | rs11170555 | subcutaneous adipose | 1.50E-18              | 1.20E-01       | 7.10E-02 | 4.84E-01   |
| TGF-beta signaling pathway | SP1     | rs2683525  | liver                | 8.10E-07              | 1.30E-01       | 7.10E-02 | 5.20E-01   |
| TGF-beta signaling pathway | SP1     | rs2683525  | omental adipose      | 8.60E-34              | 1.30E-01       | 7.10E-02 | 5.20E-01   |
| TGF-beta signaling pathway | SP1     | rs2683525  | subcutaneous adipose | 3.80E-18              | 1.30E-01       | 7.10E-02 | 5.20E-01   |
| TGF-beta signaling pathway | TGFBR1  | rs10819634 | liver                | 4.40E-05              | 7.30E-01       | 4.30E-02 | 2.49E-01   |
| TGF-beta signaling pathway | TGFBR2  | rs7625163  | liver                | 0                     | 0.7            | 0.24     | 0.67954428 |
| TGF-beta signaling pathway | THBS1   | rs11070174 | omental adipose      | 4.10E-05              | 8.30E-01       | 4.10E-01 | 7.14E-01   |
| TGF-beta signaling pathway | THBS2   | rs2494673  | omental adipose      | 1.60E-05              | NA             | 8.70E-01 | NA         |
| TGF-beta signaling pathway | THBS3   | rs4246529  | subcutaneous adipose | 3.40E-05              | 2.90E-01       | 1.10E-01 | 8.58E-01   |
| TGF-beta signaling pathway | THBS4   | rs11749003 | omental adipose      | 0.00012               | 0.3            | 0.052    | 0.89695784 |
| TGF-beta signaling pathway | ZFYVE16 | rs192313   | liver                | 9.90E-05              | 4.70E-01       | 7.10E-01 | 4.83E-01   |

| Pathway                    | Gene    | eSNP       | Tissue               | SNP-Expression Pvalue | SNP-T2D Pvalue |          |            |
|----------------------------|---------|------------|----------------------|-----------------------|----------------|----------|------------|
|                            |         |            |                      |                       | DIAGRAM        | WTCCC    | Non-WTCCC  |
| TGF-beta signaling pathway | ZFYVE16 | rs192313   | subcutaneous adipose | 5.30E-06              | 4.70E-01       | 7.10E-01 | 4.83E-01   |
| TGF-beta signaling pathway | ZFYVE16 | rs2544600  | liver                | 5.20E-05              | 4.70E-01       | 7.10E-01 | 4.83E-01   |
| TGF-beta signaling pathway | ZFYVE16 | rs2544600  | omental adipose      | 0.00013               | 0.47           | 0.71     | 0.48261473 |
| TGF-beta signaling pathway | ZFYVE16 | rs2544600  | subcutaneous adipose | 6.50E-06              | 4.70E-01       | 7.10E-01 | 4.83E-01   |
| Tight junction             | ACTG1   | rs7342974  | liver                | 0                     | 0.38           | 0.18     | 0.8915344  |
| Tight junction             | ACTG1   | rs7342974  | liver                | 3.00E-30              | 3.80E-01       | 1.80E-01 | 8.92E-01   |
| Tight junction             | ACTN1   | rs743128   | liver                | 6.50E-05              | 6.60E-02       | 7.70E-03 | 6.89E-01   |
| Tight junction             | ACTN3   | rs7925108  | omental adipose      | 1.20E-25              | 6.30E-02       | 9.30E-04 | 9.27E-01   |
| Tight junction             | ACTN3   | rs7925108  | subcutaneous adipose | 7.30E-08              | 6.30E-02       | 9.30E-04 | 9.27E-01   |
| Tight junction             | CDK4    | rs867008   | subcutaneous adipose | 1.30E-05              | 4.30E-01       | 3.80E-01 | 6.99E-01   |
| Tight junction             | CLDN10  | rs12583161 | omental adipose      | 1.50E-10              | 9.10E-01       | 8.90E-02 | 2.25E-01   |
| Tight junction             | CLDN11  | rs11915263 | omental adipose      | 0.00011               | 0.48           | 0.46     | 0.70116788 |
| Tight junction             | CLDN14  | rs9985060  | liver                | 1.50E-05              | 1.90E-01       | 5.50E-02 | 7.87E-01   |
| Tight junction             | CLDN15  | rs6942609  | subcutaneous adipose | 5.00E-07              | 1.30E-01       | 1.50E-02 | 8.90E-01   |
| Tight junction             | CLDN23  | rs2976929  | liver                | 2.70E-08              | 6.90E-03       | 4.30E-04 | 3.64E-01   |
| Tight junction             | CLDN23  | rs2976929  | omental adipose      | 7.10E-17              | 6.90E-03       | 4.30E-04 | 3.64E-01   |
| Tight junction             | CLDN23  | rs2976929  | subcutaneous adipose | 5.70E-10              | 6.90E-03       | 4.30E-04 | 3.64E-01   |
| Tight junction             | CLDN3   | rs6460052  | liver                | 1.40E-10              | 2.00E-01       | 1.70E-01 | 5.02E-01   |
| Tight junction             | CLDN4   | rs6460052  | omental adipose      | 4.80E-12              | 2.00E-01       | 1.70E-01 | 5.02E-01   |
| Tight junction             | CLDN4   | rs6460052  | subcutaneous adipose | 2.10E-12              | 2.00E-01       | 1.70E-01 | 5.02E-01   |
| Tight junction             | CLDN5   | rs2871029  | omental adipose      | 6.80E-06              | 3.60E-01       | 6.50E-01 | 3.66E-01   |
| Tight junction             | CLDN7   | rs2654189  | liver                | 3.80E-07              | 2.60E-01       | 3.90E-01 | 3.85E-01   |
| Tight junction             | CSDA    | rs10845202 | omental adipose      | 2.70E-05              | 2.60E-01       | 1.20E-01 | 7.58E-01   |
| Tight junction             | CSNK2B  | rs1077394  | liver                | 2.00E-07              | 2.10E-05       | 5.50E-04 | 1.85E-03   |
| Tight junction             | CSNK2B  | rs1077394  | omental adipose      | 2.20E-08              | 2.10E-05       | 5.50E-04 | 1.85E-03   |
| Tight junction             | CSNK2B  | rs1077394  | subcutaneous adipose | 9.50E-08              | 2.10E-05       | 5.50E-04 | 1.85E-03   |
| Tight junction             | CTNNA1  | rs10062943 | omental adipose      | 3.00E-19              | 1.40E-01       | 1.90E-01 | 3.22E-01   |
| Tight junction             | CTNNA1  | rs10062943 | subcutaneous adipose | 1.10E-09              | 1.40E-01       | 1.90E-01 | 3.22E-01   |

| Pathway        | Gene    | eSNP       | Tissue               | SNP-Expression Pvalue | SNP-T2D Pvalue |          |            |
|----------------|---------|------------|----------------------|-----------------------|----------------|----------|------------|
|                |         |            |                      |                       | DIAGRAM        | WTCCC    | Non-WTCCC  |
| Tight junction | CTNNA1  | rs744675   | omental adipose      | 2.90E-18              | 1.40E-01       | 1.90E-01 | 3.22E-01   |
| Tight junction | CTNNA1  | rs744675   | subcutaneous adipose | 2.20E-11              | 1.40E-01       | 1.90E-01 | 3.22E-01   |
| Tight junction | CTNNA2  | rs4296451  | omental adipose      | 1.60E-06              | 9.50E-01       | 1.00E-01 | 2.15E-01   |
| Tight junction | CTNNA3  | rs2441718  | liver                | 8.80E-07              | 6.70E-02       | 1.60E-01 | 1.59E-01   |
| Tight junction | CTNNB1  | rs9862024  | omental adipose      | 7.20E-05              | 9.20E-01       | 9.20E-02 | 2.23E-01   |
| Tight junction | CTTN    | rs12787159 | liver                | 7.00E-05              | NA             | 3.60E-01 | NA         |
| Tight junction | CTTN    | rs12801756 | liver                | 5.70E-05              | NA             | 3.60E-01 | NA         |
| Tight junction | EPB41   | rs12045777 | omental adipose      | 1.00E-04              | 7.40E-02       | 3.80E-01 | 7.68E-02   |
| Tight junction | EPB41L1 | rs6058296  | omental adipose      | 8.90E-07              | 9.20E-01       | 1.20E-01 | 2.65E-01   |
| Tight junction | EPB41L1 | rs6058296  | subcutaneous adipose | 6.50E-05              | 9.20E-01       | 1.20E-01 | 2.65E-01   |
| Tight junction | EPB41L2 | rs6933789  | omental adipose      | 9.80E-05              | 4.10E-01       | 3.40E-01 | 7.09E-01   |
| Tight junction | EXOC3   | rs11134054 | omental adipose      | 3.20E-18              | 1.30E-01       | 2.10E-02 | 8.11E-01   |
| Tight junction | EXOC3   | rs11134054 | subcutaneous adipose | 2.30E-14              | 1.30E-01       | 2.10E-02 | 8.11E-01   |
| Tight junction | EXOC4   | rs6976491  | liver                | 1.30E-05              | 6.70E-04       | 2.10E-04 | 8.39E-02   |
| Tight junction | F11R    | rs11265544 | liver                | 3.90E-07              | 9.70E-01       | 1.70E-01 | 2.92E-01   |
| Tight junction | GNAI1   | rs6467133  | subcutaneous adipose | 1.30E-05              | 1.10E-01       | 1.30E-01 | 3.19E-01   |
| Tight junction | GNAI3   | rs17035630 | omental adipose      | 2.90E-05              | 8.30E-01       | 6.80E-02 | 2.40E-01   |
| Tight junction | HCLS1   | rs1920322  | omental adipose      | 2.30E-09              | 5.90E-01       | 1.10E-01 | 5.88E-01   |
| Tight junction | HRAS    | rs4963128  | omental adipose      | 5.70E-09              | 9.30E-01       | 2.50E-01 | 4.20E-01   |
| Tight junction | INADL   | rs10889286 | liver                | 0                     | 0.94           | 0.035    | 0.11055581 |
| Tight junction | JAM3    | rs11606866 | liver                | 2.30E-05              | 8.20E-02       | 1.10E-02 | 7.18E-01   |
| Tight junction | JAM3    | rs11606866 | omental adipose      | 2.00E-08              | 8.20E-02       | 1.10E-02 | 7.18E-01   |
| Tight junction | JAM3    | rs12573858 | liver                | 6.20E-05              | 8.70E-02       | 1.10E-02 | 7.47E-01   |
| Tight junction | JAM3    | rs12573858 | omental adipose      | 2.10E-08              | 8.70E-02       | 1.10E-02 | 7.47E-01   |
| Tight junction | KRAS    | rs11048019 | omental adipose      | 0.00011               | 0.051          | 0.041    | 0.28980561 |
| Tight junction | KRAS    | rs4963884  | omental adipose      | 5.90E-05              | 6.30E-02       | 4.10E-02 | 3.52E-01   |
| Tight junction | LLGL2   | rs8064529  | subcutaneous adipose | 1.00E-04              | 8.00E-01       | 5.40E-01 | 8.86E-01   |
| Tight junction | MAGI3   | rs11804407 | subcutaneous adipose | 0.00011               | 0.39           | 0.067    | 0.77576527 |
| Tight junction | MLLT4   | rs6906754  | liver                | 1.20E-06              | 4.60E-01       | 6.40E-01 | 5.17E-01   |
| Tight junction | MLLT4   | rs6906754  | omental adipose      | 6.90E-08              | 4.60E-01       | 6.40E-01 | 5.17E-01   |

| Pathway        | Gene    | eSNP       | Tissue               | SNP-Expression Pvalue | SNP-T2D Pvalue |          |            |
|----------------|---------|------------|----------------------|-----------------------|----------------|----------|------------|
|                |         |            |                      |                       | DIAGRAM        | WTCCC    | Non-WTCCC  |
| Tight junction | MPP5    | rs7359115  | subcutaneous adipose | 4.80E-05              | 4.60E-01       | 6.90E-02 | 6.59E-01   |
| Tight junction | MYH1    | rs1989811  | omental adipose      | 8.10E-13              | 1.60E-04       | 4.40E-05 | 5.23E-02   |
| Tight junction | MYH1    | rs1989811  | subcutaneous adipose | 1.70E-08              | 1.60E-04       | 4.40E-05 | 5.23E-02   |
| Tight junction | MYH1    | rs2097657  | omental adipose      | 8.10E-13              | 4.30E-04       | 4.40E-05 | 1.12E-01   |
| Tight junction | MYH1    | rs2097657  | subcutaneous adipose | 1.70E-08              | 4.30E-04       | 4.40E-05 | 1.12E-01   |
| Tight junction | MYH10   | rs8067045  | liver                | 2.50E-07              | 6.60E-01       | 7.70E-01 | 7.08E-01   |
| Tight junction | MYH14   | rs10408812 | omental adipose      | 0.00012               | 0.04           | 0.27     | 0.0501446  |
| Tight junction | MYH2    | rs1989811  | omental adipose      | 7.60E-09              | 1.60E-04       | 4.40E-05 | 5.23E-02   |
| Tight junction | MYH2    | rs1989811  | subcutaneous adipose | 4.90E-10              | 1.60E-04       | 4.40E-05 | 5.23E-02   |
| Tight junction | MYH2    | rs2097657  | omental adipose      | 7.60E-09              | 4.30E-04       | 4.40E-05 | 1.12E-01   |
| Tight junction | MYH2    | rs2097657  | subcutaneous adipose | 4.90E-10              | 4.30E-04       | 4.40E-05 | 1.12E-01   |
| Tight junction | MYH3    | rs1544500  | subcutaneous adipose | 0.00011               | 0.27           | 0.13     | 0.7574358  |
| Tight junction | MYH6    | rs4635261  | liver                | 6.60E-05              | NA             | 8.60E-01 | NA         |
| Tight junction | MYH9    | rs2239781  | omental adipose      | 7.30E-05              | 3.00E-01       | 4.00E-01 | 4.48E-01   |
| Tight junction | MYL5    | rs7687129  | subcutaneous adipose | 3.50E-05              | 9.40E-01       | 5.70E-02 | 1.53E-01   |
| Tight junction | OCLN    | rs11744596 | omental adipose      | 4.40E-08              | 7.90E-01       | 3.40E-01 | 6.89E-01   |
| Tight junction | OCLN    | rs2932777  | omental adipose      | 5.00E-08              | 7.90E-01       | 3.40E-01 | 6.89E-01   |
| Tight junction | PARD3   | rs3781128  | liver                | 0                     | 0.28           | 0.26     | 0.55522983 |
| Tight junction | PARD6G  | rs12458154 | omental adipose      | 0.00013               | 0.86           | 0.54     | 0.8029392  |
| Tight junction | PPM1J   | rs10857978 | omental adipose      | 8.60E-05              | 6.80E-01       | 5.80E-02 | 3.39E-01   |
| Tight junction | PPP2CB  | rs2956012  | liver                | 2.50E-13              | 6.30E-01       | 1.00E-01 | 5.10E-01   |
| Tight junction | PPP2CB  | rs2956012  | omental adipose      | 2.30E-09              | 6.30E-01       | 1.00E-01 | 5.10E-01   |
| Tight junction | PPP2CB  | rs2956012  | subcutaneous adipose | 5.30E-09              | 6.30E-01       | 1.00E-01 | 5.10E-01   |
| Tight junction | PPP2R1A | rs6509628  | omental adipose      | 8.30E-12              | 3.10E-01       | 1.70E-01 | 7.63E-01   |
| Tight junction | PPP2R1A | rs6509628  | subcutaneous adipose | 2.90E-09              | 3.10E-01       | 1.70E-01 | 7.63E-01   |
| Tight junction | PPP2R1B | rs10502145 | liver                | 1.10E-05              | 5.60E-01       | 1.20E-01 | 6.56E-01   |
| Tight junction | PPP2R2A | rs7829309  | liver                | 5.40E-05              | 5.90E-01       | 9.60E-01 | 4.80E-01   |
| Tight junction | PPP2R2C | rs11734695 | omental adipose      | 1.80E-06              | 6.20E-01       | 3.50E-01 | 9.47E-01   |
| Tight junction | PPP2R3A | rs36064    | omental adipose      | 2.30E-05              | 1.20E-01       | 2.40E-01 | 2.27E-01   |
| Tight junction | PPP2R4  | rs1075650  | subcutaneous adipose | 3.90E-05              | 2.50E-01       | 3.20E-06 | 3.07E-02   |

| Pathway                             | Gene    | eSNP       | Tissue               | SNP-Expression Pvalue | SNP-T2D Pvalue |          |           |
|-------------------------------------|---------|------------|----------------------|-----------------------|----------------|----------|-----------|
|                                     |         |            |                      |                       | DIAGRAM        | WTCCC    | Non-WTCCC |
| Tight junction                      | PRKCA   | rs16960228 | liver                | 1.60E-06              | 5.30E-01       | 1.90E-03 | 1.02E-01  |
| Tight junction                      | PRKCB1  | rs12931116 | subcutaneous adipose | 2.70E-06              | 2.50E-01       | 3.20E-01 | 4.28E-01  |
| Tight junction                      | PRKCH   | rs2246695  | omental adipose      | 3.20E-07              | 2.40E-02       | 4.50E-01 | 1.17E-02  |
| Tight junction                      | PRKCI   | rs1352204  | omental adipose      | 9.30E-07              | 1.30E-01       | 5.30E-02 | 5.90E-01  |
| Tight junction                      | PTEN    | rs406671   | subcutaneous adipose | 7.60E-05              | 8.80E-01       | 2.10E-01 | 4.23E-01  |
| Tight junction                      | RAB13   | rs11264743 | subcutaneous adipose | 5.70E-05              | 9.20E-01       | 6.40E-01 | 8.12E-01  |
| Tight junction                      | RHOA    | rs9586     | omental adipose      | 3.60E-06              | 4.50E-01       | 3.00E-01 | 8.32E-01  |
| Tight junction                      | SYMPK   | rs7248426  | omental adipose      | 1.50E-08              | 3.60E-02       | 1.90E-01 | 6.41E-02  |
| Tight junction                      | TJP3    | rs2067019  | liver                | 7.60E-06              | NA             | 1.20E-01 | NA        |
| Antigen processing and presentation | KLRC1   | rs2900420  | liver                | 2.10E-10              | 1.60E-01       | 7.90E-02 | 5.95E-01  |
| Antigen processing and presentation | KLRC1   | rs2900420  | subcutaneous adipose | 4.80E-05              | 1.60E-01       | 7.90E-02 | 5.95E-01  |
| Antigen processing and presentation | KLRC2   | rs2607894  | liver                | 1.60E-05              | 3.40E-01       | 7.20E-02 | 8.99E-01  |
| Antigen processing and presentation | KLRC3   | rs2900420  | liver                | 5.80E-07              | 1.60E-01       | 7.90E-02 | 5.95E-01  |
| Antigen processing and presentation | KLRC3   | rs2900420  | subcutaneous adipose | 1.30E-05              | 1.60E-01       | 7.90E-02 | 5.95E-01  |
| Antigen processing and presentation | KLRC4   | rs2255336  | subcutaneous adipose | 3.40E-09              | 6.60E-01       | 1.70E-01 | 6.20E-01  |
| Antigen processing and presentation | KLRD1   | rs17808345 | omental adipose      | 2.40E-14              | 9.00E-01       | 2.10E-01 | 4.03E-01  |
| Antigen processing and presentation | KLRD1   | rs17808345 | subcutaneous adipose | 2.00E-10              | 9.00E-01       | 2.10E-01 | 4.03E-01  |
| Antigen processing and presentation | KIR2DL1 | rs581623   | liver                | 8.50E-10              | NA             | 4.50E-01 | NA        |
| Antigen processing and presentation | KIR2DL1 | rs581623   | omental adipose      | 8.50E-08              | NA             | 4.50E-01 | NA        |
| Antigen processing and presentation | KIR2DL1 | rs581623   | subcutaneous adipose | 1.90E-12              | NA             | 4.50E-01 | NA        |
| Antigen processing and presentation | KIR2DL3 | rs581623   | subcutaneous adipose | 2.90E-06              | NA             | 4.50E-01 | NA        |
| Antigen processing and presentation | KIR2DS4 | rs3745902  | liver                | 6.70E-06              | 5.30E-01       | 3.70E-01 | 8.82E-01  |

| Pathway                             | Gene     | eSNP      | Tissue               | SNP-Expression Pvalue | SNP-T2D Pvalue |          |           |
|-------------------------------------|----------|-----------|----------------------|-----------------------|----------------|----------|-----------|
|                                     |          |           |                      |                       | DIAGRAM        | WTCCC    | Non-WTCCC |
| Antigen processing and presentation | KIR3DL2  | rs3745902 | liver                | 9.20E-08              | 5.30E-01       | 3.70E-01 | 8.82E-01  |
| Antigen processing and presentation | HLA-DMB  | rs3134954 | subcutaneous adipose | 5.70E-05              | 5.70E-03       | 3.20E-01 | 2.43E-03  |
| Antigen processing and presentation | HLA-DOA  | rs2239839 | omental adipose      | 1.80E-05              | 5.20E-01       | 4.40E-02 | 4.64E-01  |
| Antigen processing and presentation | HLA-DOB  | rs209473  | omental adipose      | 1.00E-04              | 3.90E-01       | 4.50E-01 | 5.60E-01  |
| Antigen processing and presentation | HLA-DPA1 | rs3117324 | omental adipose      | 1.30E-05              | 5.70E-01       | 9.90E-02 | 5.87E-01  |
| Antigen processing and presentation | HLA-DPB1 | rs210170  | subcutaneous adipose | 3.10E-05              | 7.00E-01       | 1.50E-02 | 1.54E-01  |
| Antigen processing and presentation | HLA-DQA1 | rs1077394 | liver                | 6.90E-05              | 2.10E-05       | 5.50E-04 | 1.85E-03  |
| Antigen processing and presentation | HLA-DQA1 | rs1077394 | omental adipose      | 3.00E-12              | 2.10E-05       | 5.50E-04 | 1.85E-03  |
| Antigen processing and presentation | HLA-A    | rs2844786 | omental adipose      | 9.90E-09              | 4.00E-01       | 5.20E-04 | 1.03E-01  |
| Antigen processing and presentation | HLA-A    | rs2844786 | subcutaneous adipose | 6.80E-07              | 4.00E-01       | 5.20E-04 | 1.03E-01  |
| Antigen processing and presentation | HLA-B    | rs2260000 | subcutaneous adipose | 4.90E-06              | 7.20E-04       | 1.80E-03 | 2.98E-02  |
| Antigen processing and presentation | HLA-C    | rs2596503 | liver                | 4.60E-06              | 2.40E-03       | 3.20E-03 | 6.68E-02  |
| Antigen processing and presentation | HLA-C    | rs2596503 | omental adipose      | 3.50E-06              | 2.40E-03       | 3.20E-03 | 6.68E-02  |
| Antigen processing and presentation | HLA-C    | rs2596503 | subcutaneous adipose | 3.30E-06              | 2.40E-03       | 3.20E-03 | 6.68E-02  |
| Antigen processing and presentation | HLA-DMA  | rs2395296 | subcutaneous adipose | 0.00013               | 0.96           | 0.76     | 0.8596876 |
| Antigen processing and presentation | HLA-E    | rs2523589 | omental adipose      | 5.70E-05              | 1.40E-04       | 1.90E-03 | 5.48E-03  |
| Antigen processing and presentation | HLA-F    | rs5009448 | liver                | 3.60E-06              | 3.00E-01       | 5.40E-03 | 4.20E-01  |
| Antigen processing and presentation | HLA-G    | rs2256902 | liver                | 1.20E-05              | 1.10E-03       | 8.10E-04 | 6.80E-02  |
| Antigen processing and presentation | HLA-G    | rs2256902 | omental adipose      | 7.40E-06              | 1.10E-03       | 8.10E-04 | 6.80E-02  |

| Pathway                             | Gene     | eSNP       | Tissue               | SNP-Expression Pvalue | SNP-T2D Pvalue |          |           |
|-------------------------------------|----------|------------|----------------------|-----------------------|----------------|----------|-----------|
|                                     |          |            |                      |                       | DIAGRAM        | WTCCC    | Non-WTCCC |
| Antigen processing and presentation | HLA-G    | rs2256902  | subcutaneous adipose | 3.60E-06              | 1.10E-03       | 8.10E-04 | 6.80E-02  |
| Antigen processing and presentation | HLA-DRB1 | rs1077394  | omental adipose      | 2.90E-11              | 2.10E-05       | 5.50E-04 | 1.85E-03  |
| Antigen processing and presentation | HLA-DRB1 | rs1077394  | subcutaneous adipose | 2.20E-09              | 2.10E-05       | 5.50E-04 | 1.85E-03  |
| Antigen processing and presentation | HLA-DRB5 | rs1077394  | omental adipose      | 1.40E-05              | 2.10E-05       | 5.50E-04 | 1.85E-03  |
| Antigen processing and presentation | HLA-DRB5 | rs1077394  | subcutaneous adipose | 2.20E-05              | 2.10E-05       | 5.50E-04 | 1.85E-03  |
| Antigen processing and presentation | HLA-DQA1 | rs1077394  | subcutaneous adipose | 9.20E-07              | 2.10E-05       | 5.50E-04 | 1.85E-03  |
| Antigen processing and presentation | HLA-DQA2 | rs2858331  | omental adipose      | 7.40E-05              | 9.00E-02       | 2.70E-03 | 9.46E-01  |
| Antigen processing and presentation | HLA-DQB1 | rs7745656  | liver                | 7.40E-07              | 7.90E-02       | 1.90E-03 | 9.46E-01  |
| Antigen processing and presentation | HLA-DQB1 | rs7745656  | omental adipose      | 1.20E-19              | 7.90E-02       | 1.90E-03 | 9.46E-01  |
| Antigen processing and presentation | HLA-DQB1 | rs7745656  | subcutaneous adipose | 7.60E-22              | 7.90E-02       | 1.90E-03 | 9.46E-01  |
| Antigen processing and presentation | HLA-DRA  | rs2858331  | liver                | 1.90E-07              | 9.00E-02       | 2.70E-03 | 9.46E-01  |
| Antigen processing and presentation | HLA-DRB1 | rs1077394  | liver                | 1.50E-05              | 2.10E-05       | 5.50E-04 | 1.85E-03  |
| Antigen processing and presentation | IFNA10   | rs10738611 | omental adipose      | 8.10E-05              | 7.50E-01       | 9.30E-01 | 7.11E-01  |
| Antigen processing and presentation | IFNA14   | rs2073854  | subcutaneous adipose | 4.90E-05              | NA             | 5.20E-01 | NA        |
| Antigen processing and presentation | HSPA1B   | rs1077394  | liver                | 1.50E-05              | 2.10E-05       | 5.50E-04 | 1.85E-03  |
| Antigen processing and presentation | HSPA1B   | rs1077394  | omental adipose      | 3.90E-07              | 2.10E-05       | 5.50E-04 | 1.85E-03  |
| Antigen processing and presentation | HSPA1B   | rs1077394  | subcutaneous adipose | 1.00E-06              | 2.10E-05       | 5.50E-04 | 1.85E-03  |
| Antigen processing and presentation | HSPA1L   | rs2260000  | omental adipose      | 4.80E-05              | 7.20E-04       | 1.80E-03 | 2.98E-02  |
| Antigen processing and presentation | HSPA2    | rs7143124  | omental adipose      | 5.10E-07              | 5.90E-01       | 7.10E-01 | 6.55E-01  |



| Pathway                             | Gene  | eSNP       | Tissue               | SNP-Expression Pvalue | SNP-T2D Pvalue |          |            |
|-------------------------------------|-------|------------|----------------------|-----------------------|----------------|----------|------------|
|                                     |       |            |                      |                       | DIAGRAM        | WTCCC    | Non-WTCCC  |
| Antigen processing and presentation | HSPA4 | rs12517292 | liver                | 1.10E-06              | NA             | 1.50E-01 | NA         |
| Antigen processing and presentation | HSPA4 | rs12517292 | omental adipose      | 6.00E-05              | NA             | 1.50E-01 | NA         |
| Antigen processing and presentation | HSPA4 | rs12517292 | subcutaneous adipose | 1.00E-04              | NA             | 1.50E-01 | NA         |
| Antigen processing and presentation | HSPA8 | rs7113273  | omental adipose      | 1.20E-05              | 1.90E-01       | 6.40E-02 | 7.46E-01   |
| Antigen processing and presentation | PSME1 | rs10144409 | liver                | 7.10E-05              | 9.20E-01       | 2.40E-01 | 4.19E-01   |
| Antigen processing and presentation | NFYB  | rs11111897 | liver                | 5.60E-05              | 3.20E-01       | 2.60E-01 | 6.38E-01   |
| Antigen processing and presentation | NFYC  | rs2744805  | liver                | 3.80E-06              | 1.50E-01       | 6.00E-02 | 6.31E-01   |
| Antigen processing and presentation | NFYC  | rs2744805  | omental adipose      | 1.70E-06              | 1.50E-01       | 6.00E-02 | 6.31E-01   |
| Antigen processing and presentation | CD4   | rs1055141  | liver                | 1.40E-06              | 1.90E-01       | 5.50E-02 | 7.87E-01   |
| Antigen processing and presentation | CALR  | rs8012     | liver                | 2.30E-05              | NA             | 4.80E-02 | NA         |
| Antigen processing and presentation | CANX  | rs10516146 | subcutaneous adipose | 3.30E-05              | 3.40E-01       | 3.60E-01 | 5.58E-01   |
| Antigen processing and presentation | CANX  | rs12374446 | subcutaneous adipose | 2.90E-05              | 3.50E-01       | 3.60E-01 | 5.77E-01   |
| Antigen processing and presentation | CIITA | rs7501308  | subcutaneous adipose | 0.00013               | 0.2            | 0.11     | 0.62514245 |
| Antigen processing and presentation | CD8B  | rs6547705  | omental adipose      | 0.00013               | 0.2            | 0.087    | 0.69117694 |
| Antigen processing and presentation | CREB1 | rs2042135  | liver                | 9.00E-05              | 5.00E-01       | 1.60E-01 | 8.43E-01   |
| Antigen processing and presentation | CTSS  | rs10305724 | omental adipose      | 1.10E-05              | 9.60E-02       | 6.10E-02 | 4.25E-01   |
| Antigen processing and presentation | CTSB  | rs2898295  | liver                | 5.50E-05              | 1.20E-02       | 5.60E-03 | 2.11E-01   |
| Antigen processing and presentation | TAP1  | rs2071477  | liver                | 2.60E-06              | 1.30E-01       | 4.70E-01 | 1.29E-01   |
| Antigen processing and presentation | TAP2  | rs2858331  | omental adipose      | 2.20E-07              | 9.00E-02       | 2.70E-03 | 9.46E-01   |

| Pathway                             | Gene  | eSNP      | Tissue               | SNP-Expression Pvalue | SNP-T2D Pvalue |          |           |
|-------------------------------------|-------|-----------|----------------------|-----------------------|----------------|----------|-----------|
|                                     |       |           |                      |                       | DIAGRAM        | WTCCC    | Non-WTCCC |
| Antigen processing and presentation | TAP2  | rs2858331 | subcutaneous adipose | 1.90E-07              | 9.00E-02       | 2.70E-03 | 9.46E-01  |
| Antigen processing and presentation | TAPBP | rs2239839 | liver                | 2.20E-05              | 5.20E-01       | 4.40E-02 | 4.64E-01  |
| Antigen processing and presentation | TAPBP | rs2239839 | omental adipose      | 1.10E-07              | 5.20E-01       | 4.40E-02 | 4.64E-01  |
| Antigen processing and presentation | TAPBP | rs2239839 | subcutaneous adipose | 8.40E-05              | 5.20E-01       | 4.40E-02 | 4.64E-01  |

**Table S3. eSNP-GWAS SNP Linkage Disequilibrium**

Among the 18 T2D genes derived from the replicated GWAS SNPs, six genes have at least one eSNP. Based on HapMap data, four out of the six eSNPs that we used to represent these six GWAS genes are in reasonable linkage disequilibrium (LD) with the corresponding GWAS hits. However, the eSNP for *PPARG* is not in LD with the GWAS SNP and the eSNP for *CDKAL1* is over 600kb away from the GWAS SNP.

| Gene    | eSNP      | GWAS SNP   | eSNP_Position | GWAS SNP Position | Population | D'    | r <sup>2</sup> | LOD   | Distance |
|---------|-----------|------------|---------------|-------------------|------------|-------|----------------|-------|----------|
| NOTCH2  | rs2793823 | rs10923931 | 1.2E+08       | 1.2E+08           | CEU        | 1     | 0.69           | 18.64 | -80241   |
| PPARG   | rs1797912 | rs1801282  | 12445239      | 12368125          | CEU        | 0.527 | 0.019          | 0.77  | -77114   |
| ADAMTS9 | rs4132228 | rs4607103  | 64683154      | 64686944          | CEU        | 0.96  | 0.681          | 21.56 | -3790    |
| CDKAL1  | rs807835  | rs7754840  | 21385742      | 20769229          | CEU        |       |                |       | 616513   |
| JAZ1    | rs1635852 | rs864745   | 28155936      | 28147081          | CEU        | 1     | 0.978          | 49.35 | -8855    |
| TSPAN8  | rs1614565 | rs7961581  | 69835363      | 69949369          | CEU        | 0.852 | 0.269          | 8.31  | -114006  |
